Rajab *et al.*

## **iMAC: An interactive atlas to explore phenotypic differences between *in vivo*, *ex vivo* and *in vitro*-derived myeloid cells in the Stemformatics platform.**

Nadia Rajab<sup>1,2</sup>, Paul W Angel<sup>1</sup>, Yidi Deng<sup>1,6</sup>, Jennifer Gu<sup>1</sup>, Vanta Jameson<sup>3</sup>, Mariola Kurowska-Stolarska<sup>4</sup>, Simon Milling<sup>4</sup>, Chris M Pacheco<sup>1</sup>, Matt Rutar<sup>1</sup>, Andrew L Laslett<sup>5,6</sup>, Kim Anh Le Cao<sup>7</sup>, Jarny Choi<sup>1</sup> and Christine A Wells\*<sup>1</sup>.

### **AFFILIATIONS:**

1. The Centre for Stem Cell Systems, Faculty of Medicine, Dentistry and Health Sciences, The University of Melbourne, 30 Royal Parade Parkville, Victoria 3010, Australia.
2. CSIRO Synthetic Biology Future Science Platform
3. Melbourne Cytometry Platform (MBC node), Department of Anatomy and Neuroscience, University of Melbourne
4. The Institute of Infection, Immunity and Inflammation, Rheumatoid Arthritis Pathogenesis Centre of Excellence (RACE), The University of Glasgow.
5. CSIRO Manufacturing, Clayton, Victoria 3168, Australia
6. Australian Regenerative Medicine Institute, Monash University, Victoria 3800, Australia.
7. Melbourne Integrative Genomics, School of Mathematics and Statistics, Faculty of Science, The University of Melbourne, 30 Royal Parade Parkville, Victoria 3010, Australia

\*CORRESPONDING AUTHOR email [wells.c@unimelb.edu.au](mailto:wells.c@unimelb.edu.au)

[Key words: monocyte, macrophage, dendritic cell, microglia, langerhan cell, tissue resident macrophage, hematopoietic progenitor, monocyte-derived macrophage, pluripotent stem cell-derived macrophage.]

### **Summary:**

Understanding the myriad of myeloid subsets and identifying specific and discrete phenotypes is challenging in a human setting. Laboratory models of human myeloid biology lack tissue context, but the differences between common models and *in vivo* phenotypes have not been systematically evaluated. Here, we assemble a large transcriptional atlas of human myeloid biology representing ~1000 samples, comparing freshly isolated, cultured, and stem-cell derived myeloid cell types. Common myeloid models including pluripotent stem cell-derived macrophages fail to recapitulate developmental or tissue contexts. A shared feature of pluripotent stem cell-derived macrophages is the atypical expression of collagen, in addition to being highly efferocytotic. The resulting iMAC atlas is available at the Stemformatics.org platform, where users can review gene expression as well as upload and benchmark their own samples for comparison against a library of human tissue-resident and laboratory models of macrophage or dendritic cell biology.

Rajab et al.

## 1 **Introduction**

2 Macrophages are innate immune cells that are found resident in every tissue, with roles in  
3 tissue homeostasis, and response to infection or injury. The distinct functional roles of tissue  
4 macrophages are reflected in their transcriptional phenotypes: atlases of tissue-resident mouse  
5 macrophages, for example, have given great insight into their complexity and heterogeneity  
6 (Gautier et al., 2012; Gosselin et al., 2017). Individual transcriptome studies have played an  
7 essential role in unravelling the importance of the environment on macrophage phenotype and  
8 function (reviewed by (Huang and Wells, 2014)). These data evidence the shared molecular  
9 pathways of myeloid cells responding to pathogenic challenge, and the receptiveness of  
10 macrophages to environmental cues.

11  
12 Much of our understanding of macrophage biology, including many of the molecular  
13 mechanisms of innate immune signaling, have arisen from mouse gene knock-out studies.  
14 However, cross-species comparisons of immune cells highlight differences between mouse and  
15 man. These include the glycolytic switch associated with metabolic reprogramming in activated  
16 mouse macrophages (Vijayan et al., 2019); divergent patterns of pathogen receptor expression  
17 (Vijayan et al., 2012) and transcriptional responses to innate immune stimuli (Schroder et al.,  
18 2012). Cross-species comparisons are further hampered by the absence of population level  
19 immune-activation maps, with most mouse studies in macrophage biology conducted on a  
20 limited number of inbred lines.

21  
22 The need for improved molecular models of primary human cells is evident from the rising  
23 popularity of single cell transcriptomic atlases, exemplified by the human cell atlas consortium  
24 (Hay et al., 2018; Regev et al., 2017). However, unbiased profiling of cells also requires  
25 computational predictions of cell identity, raising further questions about how best to accurately  
26 identify immune cell populations resident in tissues, and discriminate these from circulating or  
27 infiltrating peripheral blood cells. The isolation, and identification of tissue-resident myeloid cells  
28 can be particularly fraught if populations are rare or hard to isolate using enzymatic or other  
29 dissociation methods. These procedures can alter myeloid transcriptomes (Gosselin et al.,  
30 2017), resulting in underrepresentation or phenotypic ambiguity of resident macrophages in  
31 single cell maps of a tissue. It might be argued that human macrophages suffer from an identity  
32 crisis, relying on equivalency to laboratory models of human macrophage biology such as ex-  
33 vivo culture of monocyte-derived macrophages, which may not be appropriate as a benchmark  
34 for specialized tissue functions.

35  
36 The potential to model tissue residency, disease phenotypes and activation status of human  
37 macrophages using pluripotent stem cells (PSC) is a growing area of interest (Reviewed (Lee et  
38 al., 2018; Rajab et al., 2018)). However, the anatomical context or developmental ontogeny of  
39 these cells is still not well understood, nor their capacity to model specialized behaviors of  
40 myeloid cells including roles within a tissue niche. While databases such as BloodSpot (Bagger  
41 et al., 2016) and Haematlas (Watkins et al., 2009) provide a useful snapshot of gene expression  
42 of blood types, these lack depth with regard to tissue representation, common laboratory  
43 models or activating stimuli. Here, we describe an integrated myeloid transcriptome atlas to  
44 identify and benchmark human myeloid subpopulations from *ex vivo*, *in vivo* and *in vitro*

Rajab et al.

45 sources. Our motivation was to construct a reference atlas of human myeloid biology that draws  
46 on important studies already in the public domain, and that can be added to by the research  
47 community as new cell models or new profiling platforms become available. The atlas is made  
48 available as an interactive online resource <https://www.stemformatics.org/atlas/imac>.

49

### 50 **A reference atlas for human myeloid biology.**

51 We first compiled a reference transcriptional atlas (Figure 1A) from public and proprietary  
52 transcriptomic data from 44 studies and ~1000 samples representing peripheral blood  
53 monocytes, tissue-resident, *ex vivo* and *in vitro*-derived macrophages and dendritic cells.  
54 Samples were curated with respect to phenotype, source and isolation method. Datasets were  
55 processed through the Stemformatics pipeline which includes a stringent set of quality control  
56 requirements for hosting on the Stemformatics.org portal (Choi et al., 2019a). We constructed  
57 the atlas by implementing a two-step process (Angel et al., 2020). Firstly, transformation of  
58 expression values from the original studies to percentile values to facilitate the comparison of  
59 different experimental series was performed. Secondly, using a univariate estimation of their  
60 platform dependence, genes whose expression values were significantly impacted by the way  
61 that they were measured were removed from the atlas. This approach led to reproducible  
62 clustering of distinct myeloid classes on a PCA (Figure 1B and Supplementary Figure 1).  
63 Variables such as progenitor source (hematopoietic stem cell (HSC), monocyte-derived, or  
64 pluripotent stem cell (PSC)-derived), culture status or activating condition contributed to  
65 clustering of samples. The reproducibility of myeloid subsets including dendritic cells,  
66 monocytes and neutrophils was validated by projecting an independent RNAseq dataset of well  
67 annotated blood cell types from Haemopedia (Choi et al., 2019b) (Figure 1C).

68

69 We next assessed the usefulness of the atlas as an annotation reference tool for single cell  
70 data. We took two datasets describing blood monocytes and dendritic cells (Villani et al., 2017)  
71 and (Dutertre et al., 2019) which had previously not shown clear agreement on the identity of  
72 dendritic cell (DC) subsets (Figure 1D). Using the iMAC atlas as the reference, the Villani  
73 scRNA seq clusters clearly aligned to respective DC and monocyte groups, with a Capybara  
74 similarity estimate (Figure 1E) predicting that the Villani data had identified 2 distinct  
75 plasmacytoid DC (pDC) subsets, 2 distinct DC2 (CD1c+) subsets and an intermediate subset  
76 that sat between the classical monocyte and DC2 clusters. The DC5 cluster in the original study  
77 was described as an AXL+ SIGLEC6+ (AS-DC) subset that shared classical cell surface  
78 markers with pDCs. AS-DCs were suggested to be the subset contaminating traditional pDC  
79 isolation strategies with the capacity to stimulate T-cells. The Dutertre DC2 subsets aligned  
80 closely with atlas DC2 cells. Thus, the iMAC atlas provides a useful annotation tool to  
81 benchmark myeloid datasets that does not require identification of classical cell surface  
82 markers, and that can predict novel or intermediate cell clusters.

83

### 84 **Monocytes acquire a 'Culture-Phenotype'**

85 Monocytes are post-mitotic blood cells derived from bone marrow progenitors that are short  
86 lived in circulation and can repopulate macrophages in some tissue niches. The largest  
87 population of circulating monocytes is marked by high levels of expression of the LPS co-  
88 receptor CD14, which is typically used to isolate monocytes from blood. Intermediate and

Rajab et al.

89 nonclassical subsets are marked by acquisition of the type III FcR $\gamma$ , CD16 (Schmidl et al.,  
90 2014) and are included in the atlas. Cultured monocytes have been previously described as  
91 'activated', but while we observe a distinct culture phenotype (Figure 2), the transcriptome of  
92 cultured cells mimics many of the features of a monocyte after extravasation into tissue. Figure  
93 2B shows the grouping of peripheral blood monocytes, in a distinct cluster to monocytes that  
94 have been exposed to tissue culture plastic and culture media. This culture phenotype is typified  
95 here by a decrease in endothelial-adhesion proteins including the selectin SELL (Figure 2D).  
96 Regulators of RAS/RAF signaling including SPRED2 (Wakioka et al., 2001) have an elevated  
97 expression in cultured monocytes (Figure 2E), consistent with spreading and migration across  
98 tissue culture plastics. The classical monocyte-derived macrophage (MDM) requires *in vitro*  
99 differentiation of monocytes using several days exposure to growth factors such as  
100 macrophage-colony stimulating factor (M-CSF; CSF-1) or granulocyte-macrophage colony-  
101 stimulating factor (GM-CSF). These group distinctly from the cultured monocyte cluster,  
102 spreading further upwards along the culture axis (Figure 2F).

103  
104 One interactive feature of the atlas is that gene expression and cell source can be explored  
105 together. The culture phenotype acquired by monocytes appears to be a prelude to activation,  
106 which can be observed along an adjacent axis in Figure 2F and is exemplified by the expression  
107 of IL6. Pathogen-activated phenotypes of cultured monocytes or MDM are typified by high  
108 expression of this and other cytokines, but this is. Cultured monocytes express higher levels of  
109 chemokines, such as CCL2, than peripheral monocytes (Figure 2G). Culture induces the  
110 expression of SLAMF1 (Supplementary Table 1), which has shown to be necessary for TLR4  
111 activation in human macrophages (Yurchenko et al., 2018). Cultured monocytes also express  
112 higher levels of ITGB8 than circulating monocytes (Supplementary Table 1), which is necessary  
113 for activating latent TGF- $\beta$  (Kelly et al., 2018).

114  
115 **Primary tissue-resident cells segregate into 'DC-like' and 'monocyte-like' communities.**

116 Circulating and tissue resident dendritic cells occupied a distinct transcriptional niche but share  
117 the activation axis seen in monocytes and macrophages. *In vitro* differentiated dendritic cells,  
118 expanded from cord blood isolated hematopoietic progenitor cells and monocytes, are  
119 considerably removed from the *in vivo* cells (Figure 1 D and Figure 3A), including down-  
120 regulation of receptors such as CX3CR1, IL18R1 and TLR7 (Figure 3B and Supplementary  
121 Table 4). Other molecules, such as the cell-fusion protein DC-STAMP are gained in culture  
122 (Figure 3C and Supplementary Table 4). In terms of proximity to other atlas cell types, these  
123 appear high on the activation axis and are closely associated with monocyte-derived  
124 macrophages. So, while providing useful models of myeloid biology, cord blood-derived  
125 dendritic cells don't adequately capture key aspects of *in vivo* myeloid biology.

126  
127 Isolation of primary tissue-resident macrophages is particularly difficult as this can result in  
128 alterations in phenotype (Gosselin et al., 2017). The difficulty of isolating tissue-resident  
129 populations from healthy human tissue is evident from the spread of tissue resident  
130 macrophages in comparison to tissue-resident dendritic cells (Figure 3D), noting that several of  
131 the macrophage datasets were obtained through surgical biopsies from patients with  
132 inflammatory disease, and indeed mapped across the inflammatory axis. Tissue resident

Rajab et al.

133 macrophages, including Kupffer cells, microglia, alveolar macrophages, gut and synovial  
134 macrophages occupy a broad niche on the atlas between dendritic cells, peripheral blood  
135 monocytes, and cultured monocytes (Figure 3D). Although there was no discrete partitioning of  
136 macrophages from individual tissues, distinct classes of tissue resident macrophages were  
137 observed in the atlas –(the alveolar, colon and macrophages isolated from tumour ascites  
138 (TAM) (Figure 3D and Supplementary Figure 2A) grouped together between cultured  
139 monocytes and CD1c+ dendritic cells, and a second spread containing synovial macrophages,  
140 microglia and Kupffer cells aligned with the iPSC-derived cells.

141  
142 Primary microglia included in the iMAC atlas include both *in vivo* isolated fetal and cultured *ex*  
143 *vivo* fetal and adult microglia (Supplementary Figure 2A). The profiles of *in vivo* isolated fetal  
144 microglia cluster apart from the spread of *ex vivo* cultured adult and fetal microglia. Cultured  
145 tissue macrophages including cultured primary microglia or Kupffer cells shared a broad  
146 transcriptional signature with monocyte-derived macrophages, and pluripotent-stem cell derived  
147 myeloid cells.

148  
149 **PSC-derived macrophages share features with tissue-resident macrophages despite**  
150 **poor maturation**

151 Macrophages derived from human PSCs offer new opportunities to model *in vivo* macrophage  
152 biology. When reviewing the studies contributing to this atlas, we noted that PSC-derived  
153 macrophages are typically benchmarked against monocyte-derived macrophages (MDMs), or  
154 cultured primary cells, using a suite of phenotyping techniques. Each experiment includes a  
155 small number of samples for transcriptional profiling, with a few notable exceptions (Alasoo et  
156 al., 2018). We argue that, given the spectrum of possible resident tissue macrophage  
157 phenotypes, it would be more useful to compare PSC-derived cells against an atlas of possible  
158 macrophage phenotypes. Whilst several groups reuse publicly available tissue macrophage  
159 data, the opportunity to carry out large-scale comparisons to different primary myeloid cells has  
160 been limited by the availability of relevant data on a compatible platform.

161  
162 Microglia represent just over a third of PSC-directed myeloid differentiation studies in the atlas.  
163 These do not resolve into a unique cluster but share transcriptional phenotypes with PSC-  
164 derived and tissue-resident macrophages, which sit deep in the broad culture axis associated  
165 with the expression of lipid-scavenging genes required for efferocytosis. The exception are  
166 ‘cytokine-matured’ PSC-derived microglia samples from (Abud et al., 2017). These are closest  
167 to the *in vivo* fetal microglia samples of the PSC-microglia but are also closely associated with  
168 other primary tissue resident macrophages from lung, joint and gut. The atlas does provide an  
169 opportunity to review the expression of markers thought to distinguish microglia from other  
170 primary macrophages. TMEM119, for example, is largely restricted to primary or PSC-derived  
171 microglia, although the (Abud et al., 2017) samples have low expression of this marker  
172 (Supplementary Figure 2B). P2RY12 is variably expressed across all microglial samples, but its  
173 expression is also evident in different tissue-resident samples including those derived from gut  
174 and synovial tissues (Figure 3D).

175



Rajab et al.

176 Dendritic cells and macrophages are known professional antigen-presenting cells. The initiation  
177 of adaptive immune responses requires presentation of antigen through major histocompatibility  
178 complex I or II. The majority of *in vitro*-derived macrophages have low expression of HLA  
179 relevant genes (Supplementary Table 2) including CIITA, a known master regulator of MHCII  
180 gene expression, which suggests poor maturation in regard to their antigen presentation.  
181 Nevertheless, some *in vitro*-derived macrophages cultured with stimulating factors  
182 (Supplementary Figure 2C) do show inducible CIITA expression, demonstrating that they have  
183 the capacity to express antigen-presenting machinery. It is also worth noting that there are *in*  
184 *vitro*-derived macrophages, and microglia, (Abud et al., 2017; Honda-Ozaki et al., 2018) that do  
185 appear to have high CIITA expression without stimulating factors (Supplementary Figure 2C).  
186 For microglia samples (Abud et al., 2017), this may be an impact of long term culture conditions  
187 in addition to supplementation of CX3CL1 and CD200, the latter confirming the authors'  
188 observations. In regards to macrophage samples (Honda-Ozaki et al., 2018), this may be an  
189 impact of immortalization of progenitor cells.

190

### 191 **PSC-derived macrophages display transcriptional hallmarks of efferocytosis**

192 There has been growing interest in the importance of metabolic reprogramming in macrophage  
193 responses, so we asked whether media supplementation could explain the spread of PSC-  
194 derived macrophages on the iMAC atlas. All PSC-derivation protocols supplement media with  
195 fatty- or amino-acids, including L-Glutamine, non-essential amino acids (NEAA), Linoleic and  
196 Linolenic acids. Some methods add fetal bovine or calf serum, but there was no obvious  
197 correlation between serum addition and without. Overall, factors are so ubiquitously used that  
198 supplementation alone could not explain the differences between PSC and cultured primary  
199 macrophages.

200

201 Lipid homeostasis is an important role for resident tissue macrophages. A high proportion of  
202 genes differentially expressed between *in vitro*-derived macrophages/microglia/kupffer cells and  
203 tissue resident cells are involved in lipid transport, catabolism and in buffering the cells from  
204 concomitant stresses associated with lipid turn-over. For example, reduced expression of  
205 ABCA6 is consistent with high efflux of cholesterol from these macrophages (Supplementary  
206 Figure 3A). Higher levels of mitochondrial acyl-CoA dehydrogenase ACADM (Supplementary  
207 Figure 3B) and phosphatidate phosphatase LPIN3 (Supplementary Figure 3C) suggests high  
208 lipid turnover.

209

210 Efferocytosis, or apoptotic cell clearance, has broad immunomodulatory effects (Reviewed by  
211 (Elliott et al., 2017)) and active engulfment and clearance of cells by PSC-macrophages is  
212 clearly observed in the absence of any inflammatory activation (Supplementary Video).  
213 Efferocytosis modulates macrophages from a pro-inflammatory phenotype to one with resolving  
214 qualities (Yamaguchi et al., 2014), consistent with the patterns of gene expression observed in  
215 cultured macrophages. A study (Cao et al., 2019) demonstrated higher lipid uptake in PSC-  
216 macrophages compared to peripheral blood MDMs, concordant with higher expression of  
217 efferocytosis-related genes including S1PR1 and MERTK. We confirm that MERTK is generally  
218 highly expressed in PSC-derived macrophages, but that there is also a tissue-resident  
219 distribution of MERTK expression, with very low levels observed in primary alveolar

Rajab et al.

220 macrophages, and highest levels observed in human fetal microglia (Supplementary Figure 2).  
221 Tissue-resident macrophages are known first-responders to tissue damage and are key in  
222 orchestrating inflammation and its subsequent resolution. This appears to be a phenotype that  
223 is selected for in cultured macrophages and may be an inevitable consequence of derivation  
224 that strives for high cell yield.

225

### 226 **PSC-derived macrophages do not recapitulate a developmental hematopoietic ontogeny.**

227 Many PSC-derived systems recapitulate fetal, rather than adult phenotypes, so it is no surprise  
228 that others have argued that PSC-derivation protocols mimic primitive rather than definitive  
229 myeloid biology. This is largely based on discriminating MYB expression in progenitor cells,  
230 which is associated with definitive hematopoiesis and has high expression in hematopoietic  
231 progenitor cells. It is clear that MYB is not required for PSC-derived myelopoiesis as  
232 macrophages are derived in MYB-KO embryonic stem cells (Buchrieser et al., 2017).  
233 Nevertheless, MYB is highly and ubiquitously expressed in PSC-myeloid progenitors, including  
234 common myeloid progenitors and hemogenic endothelium, and is retained at high levels in  
235 some PSC-derived microglia (Supplementary Figure 3D).

236

237 In comparison to primary cell datasets, PSC-macrophage studies that were overlaid onto the  
238 iMAC atlas grouped broadly with cultured monocytes and tissue-resident macrophages. Despite  
239 arguments on recapitulation of fetal origin, PSC-macrophages, including PSC-microglia and  
240 PSC-Kupffer cells, form an extended group associated with high expression of the human  
241 homologue of the F4/80 antigen, ADGRE1, as well as high expression of lipid-scavenging  
242 receptors such as SCARB1 (Supplementary Table 2, 3 and 5). Furthermore, MAF expression is  
243 indistinguishable in macrophages of different origin (Supplementary Figure 3E). Interestingly,  
244 LIN28B, appears to be highly expressed in *in vitro*-derived macrophages compared to *in vivo*  
245 and *ex vivo* cells (Supplementary Figure 3F), which may point to incomplete silencing of the  
246 Let7 microRNA pathway and maintenance of a fetal state (Grant Rowe et al., 2016; Zhou et al.,  
247 2017), but is also characteristic of myeloid leukemias.

248

249 Some other phenotypes previously attributed to ontogeny in PSC-derived cells may rather  
250 reflect a more general culture context. For example, ADGRE1 (F4/80) expression has been  
251 attributed to yolk-sac derived myeloid cells in mouse (Schulz et al., 2012). While high on PSC-  
252 derived cells, ADGRE1 is also clearly upregulated in culture. This is exemplified through primary  
253 human microglia that have low expression of ADGRE1 in comparison to *ex vivo* culture or PSC-  
254 derived cells (Supplementary Table 5).

255

### 256 **PSC-Macrophages express high levels of collagen**

257

258 Collagen production and deposition alongside extracellular matrix remodeling are processes  
259 involved in wound healing and scarring. Macrophages are instrumental in instructing tissue  
260 repair, particularly through the production of growth factors such as TGF- $\beta$ , IGF1 and PDGF  
261 (Shook et al., 2018). Secreted growth factors drive fibroblasts and endothelial cells to produce  
262 extracellular matrix components, promoting keloid formation as well as angiogenesis. This  
263 model has macrophages influencing collagen deposition by neighboring stromal cells, however,

Rajab et al.

264 in some instances are capable of contributing to collagen deposition as demonstrated in mouse  
265 and zebrafish injury models (Simões et al., 2020). Gene-set enrichment analysis of the genes  
266 that are most correlated with *in vitro*-derived macrophages moving away (Figure 4A) from the  
267 tissue resident populations revealed that the most significant pathways in these cells involved  
268 collagen synthesis and production (Table 1). A STRING protein-protein interaction network  
269 (Figure 4B) shows that this phenotype is significantly enriched for highly connected matrix  
270 remodeling, collagen deposition and cadherin-mediated cell-cell and cell-matrix interactions.

271  
272 Perhaps pluripotent stem cell-derived cells are being driven to adopt a pro-fibrotic phenotype  
273 through the derivation or culture contents. Initial observations on analysis of myeloid-,  
274 pluripotent stem cell- and hematopoietic progenitor-derived cells, highlight higher expression of  
275 collagen genes in pluripotent stem cell-derived cells (Figure 4C). To investigate whether this  
276 phenotype is due to culture impact, we isolated peripheral blood monocytes and derived human  
277 PSC-progenitors and cultured these cells with the same culture media in the presence of M-  
278 CSF for 5 days to drive macrophage differentiation. On day 5, cells were either stimulated with  
279 LPS for 2 hours before extraction or extracted as control samples for sequencing analysis.  
280 Analysis of sequencing samples showed the same enriched collagen and cadherin networks  
281 with high expression of these genes observed in PSC-macrophages, with little or no expression  
282 in monocyte-derived macrophages regardless of whether cells were stimulated or not (Figure  
283 4D). To determine this at a protein level, we carried out intracellular flow cytometry analysis of  
284 type I collagen in PSC- and monocyte-derived cells (Figure 4E). Compared with staining  
285 controls, we observed higher levels of type I collagen in PSC-macrophages. Collectively, our  
286 results suggest that although culture media can impact cell phenotype, it is not the main driver  
287 for this pro-fibrotic phenotype in PSC-macrophages in the final stages of differentiation.

288

### 289 **Concluding Remarks**

290 Human macrophage biology is integral to the development homeostasis and disease  
291 mechanisms in every tissue in the body, but our understanding of human myeloid biology is  
292 limited by the quality by the models available to us. Here we describe an integrated myeloid  
293 transcriptome atlas as a novel resource to identify myeloid cells in single cell datasets and to  
294 benchmark *in vitro* models of *in vivo* biology. Implementation in Stemformatics enables users to  
295 upload their own data to benchmark cell types against the atlas for rapid and intuitive cell-  
296 classification.

297

298 By benchmarking curated public data of PSC-macrophages and their precursor cells against the  
299 atlas, it is apparent that these represent neither definitive nor primitive myelopoiesis, or rather,  
300 that they imperfectly recapitulate aspects of both. PSC-conditions clearly do not mimic the  
301 developmental time-frame nor tissue niche of yolk-sac, fetal liver or bone marrow. In our hands  
302 PSC-macrophages display transcriptional hallmarks of efferocytosis and surprisingly collagen  
303 production, which may suggest that the derivation process of these cells are driving a pro-  
304 fibrotic phenotype. Perhaps the ontogeny question is less interesting than understanding the  
305 molecular networks that can be co-opted in stem cell derived myeloid models, to deliver specific  
306 phenotypic properties outside of the constraints of development.

307



Rajab et al.

308 **Acknowledgements**

309 The authors thank Tyrone Chen and Othmar Korn for assistance with data processing and Isha  
310 Nagpal for website development to support the iMAC interactive viewer. The authors thank  
311 Ramaciotti Centre for Genomics (University of New South Wales; Sydney) for mRNA  
312 sequencing, and the Melbourne Cytometry Platform for flow cytometry assistance. This work  
313 was funded by Stem Cells Australia, an Australian Research Council Special Research Initiative  
314 [SRI110001002]; Wellcome Trust funding and acknowledgement of UoG facilities; NR is funded  
315 by the Centre for Stem Cell Systems and the CSIRO Synthetic Biology Future Science Platform.  
316 CAW is funded by a Future Fellowship from the Australian Research Council [FT150100330];  
317 JC is funded by the JEM Research Foundation to the Stem Cell Atlas.

318

319 **Author Contributions**

320 Conception NR, JC, CAW; Experimental Investigation and Interpretation NR, VJ, JG, CAW;  
321 Experimental Resources ALL, CAW; Methodology PWA, JC, YD; Data provider NR, MKS, SM;  
322 Curation NR, MR, CMP, CAW; Statistical analysis YD, KALC, PWA; Writing – original draft NR,  
323 CAW; Writing - review and editing NR, PWA, SM, ALL, KALC, JC, CAW; Supervision CAW,  
324 ALL, KAC; Project Funding - CAW.

325

326 **Declaration of Interests**

327 None

328

329 **References**

- 330 Abud, E.M., Ramirez, R.N., Martinez, E.S., Healy, L.M., Nguyen, C.H.H., Newman, S.A.,  
331 Yeromin, A. V., Scarfone, V.M., Marsh, S.E., Fimbres, C., et al. (2017). iPSC-Derived Human  
332 Microglia-like Cells to Study Neurological Diseases. *Neuron* 94, 278-293.e9.
- 333 Alasoo, K., Rodrigues, J., Mukhopadhyay, S., Knights, A.J., Mann, A.L., Kundu, K., Hale, C.,  
334 Dougan, G., and Gaffney, D.J. (2018). Shared genetic effects on chromatin and gene  
335 expression indicate a role for enhancer priming in immune response. *Nat. Genet.* 50, 424–431.
- 336 Angel, P.W., Rajab, N., Deng, Y., Pacheco, C.M., Chen, T., Le Cao, K.-A., Choi, J., and Wells,  
337 C. (2020). A simple, scalable approach to building a cross-platform transcriptome atlas. *BioRxiv*  
338 2020.03.09.984468.
- 339 Bagger, F.O., Sasivarevic, D., Sohi, S.H., Laursen, L.G., Pundhir, S., Sønderby, C.K., Winther,  
340 O., Rapin, N., and Porse, B.T. (2016). BloodSpot: A database of gene expression profiles and  
341 transcriptional programs for healthy and malignant haematopoiesis. *Nucleic Acids Res.* 44,  
342 D917–D924.
- 343 Buchrieser, J., James, W., and Moore, M.D. (2017). Human Induced Pluripotent Stem Cell-  
344 Derived Macrophages Share Ontogeny with MYB-Independent Tissue-Resident Macrophages.  
345 *Stem Cell Reports* 8, 334–345.
- 346 Cao, X., Yakala, G.K., van den Hil, F.E., Cochrane, A., Mummery, C.L., and Orlova, V. V.  
347 (2019). Differentiation and Functional Comparison of Monocytes and Macrophages from hiPSCs  
348 with Peripheral Blood Derivatives. *Stem Cell Reports* 12, 1282–1297.
- 349 Choi, J., Pacheco, C.M., Mosbergen, R., Korn, O., Chen, T., Nagpal, I., Englart, S., Angel, P.W.,  
350 and Wells, C.A. (2019a). Stemformatics: visualize and download curated stem cell data. *Nucleic*  
351 *Acids Res.* 47, D841–D846.

Rajab et al.

- 352 Choi, J., Baldwin, T.M., Wong, M., Bolden, J.E., Fairfax, K.A., Lucas, E.C., Cole, R., Biben, C.,  
353 Morgan, C., Ramsay, K.A., et al. (2019b). Haemopedia RNA-seq: a database of gene  
354 expression during haematopoiesis in mice and humans. *Nucleic Acids Res.* *47*, D780–D785.
- 355 Dutertre, C.A., Becht, E., Irac, S.E., Khalilnezhad, A., Narang, V., Khalilnezhad, S., Ng, P.Y.,  
356 van den Hoogen, L.L., Leong, J.Y., Lee, B., et al. (2019). Single-Cell Analysis of Human  
357 Mononuclear Phagocytes Reveals Subset-Defining Markers and Identifies Circulating  
358 Inflammatory Dendritic Cells. *Immunity* *51*, 573-589.e8.
- 359 Elliott, M.R., Koster, K.M., and Murphy, P.S. (2017). Efferocytosis Signaling in the Regulation of  
360 Macrophage Inflammatory Responses. *J. Immunol.* *198*, 1387–1394.
- 361 Fabregat, A., Jupe, S., Matthews, L., Sidiropoulos, K., Gillespie, M., Garapati, P., Haw, R.,  
362 Jassal, B., Korninger, F., May, B., et al. (2018). The Reactome Pathway Knowledgebase.  
363 *Nucleic Acids Res.* *46*, D649–D655.
- 364 Gautier, E.L., Shay, T., Miller, J., Greter, M., Jakubzick, C., Ivanov, S., Helft, J., Chow, A.,  
365 Elpek, K.G., Gordonov, S., et al. (2012). Gene-expression profiles and transcriptional regulatory  
366 pathways that underlie the identity and diversity of mouse tissue macrophages. *Nat. Immunol.*  
367 *13*, 1118–1128.
- 368 Gosselin, D., Skola, D., Coufal, N.G., Holtman, I.R., Schlachetzki, J.C.M., Sajti, E., Jaeger, B.N.,  
369 O'Connor, C., Fitzpatrick, C., Pasillas, M.P., et al. (2017). An environment-dependent  
370 transcriptional network specifies human microglia identity. *Science* (80-. ). *356*, 1248–1259.
- 371 Grant Rowe, R., Wang, L.D., Coma, S., Han, A., Mathieu, R., Pearson, D.S., Ross, S., Sousa,  
372 P., Nguyen, P.T., Rodriguez, A., et al. (2016). Developmental regulation of myeloerythroid  
373 progenitor function by the Lin28b-let-7-Hmga2 axis. *J. Exp. Med.* *213*, 1497–1512.
- 374 Hay, S.B., Ferchen, K., Chetal, K., Grimes, H.L., and Salomonis, N. (2018). The Human Cell  
375 Atlas bone marrow single-cell interactive web portal. *Exp. Hematol.* *68*, 51–61.
- 376 Honda-Ozaki, F., Terashima, M., Niwa, A., Saiki, N., Kawasaki, Y., Ito, H., Hotta, A., Nagahashi,  
377 A., Igura, K., Asaka, I., et al. (2018). Pluripotent Stem Cell Model of Nakajo-Nishimura  
378 Syndrome Untangles Proinflammatory Pathways Mediated by Oxidative Stress. *Stem Cell*  
379 *Reports* *10*, 1835–1850.
- 380 Huang, E., and Wells, C.A. (2014). Environmental Influences Interface of Genetic, Epigenetic,  
381 and Responsiveness Is Determined at the The Ground State of Innate Immune Downloaded  
382 from. *J Immunol J. Immunol. J. Immunol.* *193*, 13–19.
- 383 Jones, J.C., Sabatini, K., Liao, X., Tran, H.T., Lynch, C.L., Morey, R.E., Glenn-Pratola, V.,  
384 Boscolo, F.S., Yang, Q., Parast, M.M., et al. (2013). Melanocytes derived from transgene-free  
385 human induced pluripotent stem cells. *J. Invest. Dermatol.* *133*, 2104–2108.
- 386 Joshi, K., Elso, C., Motazedian, A., Labonne, T., Schiesser, J. V., Cameron, F., Mannering, S.I.,  
387 Elefanty, A.G., and Stanley, E.G. (2019). Induced pluripotent stem cell macrophages present  
388 antigen to proinsulin-specific T cell receptors from donor-matched islet-infiltrating T cells in type  
389 1 diabetes. *Diabetologia* *62*, 2245–2251.
- 390 Kelly, A., Gunaltay, S., McEntee, C.P., Shuttleworth, E.E., Smedley, C., Houston, S.A., Fenton,  
391 T.M., Levison, S., Mann, E.R., and Travis, M.A. (2018). Human monocytes and macrophages  
392 regulate immune tolerance via integrin  $\alpha\beta 8$ -mediated TGF $\beta$  activation. *J. Exp. Med.* *215*,  
393 2725–2736.
- 394 Kong, W., Fu, Y.C., and Morris, S.A. (2020). Capybara: A computational tool to measure cell  
395 identity and fate transitions. *BioRxiv* 2020.02.17.947390.

Rajab et al.

- 396 Lee, C.Z.W., Kozaki, T., and Ginhoux, F. (2018). Studying tissue macrophages in vitro: are  
397 iPSC-derived cells the answer? *Nat. Rev. Immunol.* 18, 716–725.
- 398 Ng, E.S., Davis, R., Stanley, E.G., and Elefanty, A.G. (2008). A protocol describing the use of a  
399 recombinant protein-based, animal product-free medium (APEL) for human embryonic stem cell  
400 differentiation as spin embryoid bodies. *Nat. Protoc.* 3, 768–776.
- 401 Rajab, N., Rutar, M., Laslett, A.L., and Wells, C.A. (2018). Designer macrophages: Pitfalls and  
402 opportunities for modelling macrophage phenotypes from pluripotent stem cells. *Differentiation*  
403 104, 42–49.
- 404 Regev, A., Teichmann, S.A., Lander, E.S., Amit, I., Benoist, C., Birney, E., Bodenmiller, B.,  
405 Campbell, P., Carninci, P., Clatworthy, M., et al. (2017). The Human Cell Atlas. *Elife* 6.
- 406 Schmidl, C., Renner, K., Peter, K., Eder, R., Lassmann, T., Balwierz, P.J., Itoh, M., Nagao-Sato,  
407 S., Kawaji, H., Carninci, P., et al. (2014). Transcription and enhancer profiling in human  
408 monocyte subsets. *Blood* 123, e90–e99.
- 409 Schroder, K., Irvine, K.M., Taylor, M.S., Bokil, N.J., Le Cao, K.-A., Masterman, K.-A., Labzin,  
410 L.I., Semple, C.A., Kapetanovic, R., Fairbairn, L., et al. (2012). Conservation and divergence in  
411 Toll-like receptor 4-regulated gene expression in primary human versus mouse macrophages.  
412 *Proc. Natl. Acad. Sci. U. S. A.* 109, E944-53.
- 413 Shook, B.A., Wasko, R.R., Rivera-Gonzalez, G.C., Salazar-Gatzimas, E., López-Giráldez, F.,  
414 Dash, B.C., Muñoz-Rojas, A.R., Aultman, K.D., Zwick, R.K., Lei, V., et al. (2018). Myofibroblast  
415 proliferation and heterogeneity are supported by macrophages during skin repair. *Science* (80-  
416 ). 362, eaar2971.
- 417 Simões, F.C., Cahill, T.J., Kenyon, A., Gavriouchkina, D., Vieira, J.M., Sun, X., Pezzolla, D.,  
418 Ravaud, C., Masmanian, E., Weinberger, M., et al. (2020). Macrophages directly contribute  
419 collagen to scar formation during zebrafish heart regeneration and mouse heart repair. *Nat.*  
420 *Commun.* 11, 1–17.
- 421 Szklarczyk, D., Gable, A.L., Lyon, D., Junge, A., Wyder, S., Huerta-Cepas, J., Simonovic, M.,  
422 Doncheva, N.T., Morris, J.H., Bork, P., et al. (2019). STRING v11: protein–protein association  
423 networks with increased coverage, supporting functional discovery in genome-wide  
424 experimental datasets. *Nucleic Acids Res.* 47, D607–D613.
- 425 Turlach, B.A., and Weingessel, A. (2019). quadprog: Functions to Solve Quadratic  
426 Programming Problems. R package version 1.5-8.
- 427 Vijayan, D., Radford, K.J., Beckhouse, A.G., Ashman, R.B., and Wells, C.A. (2012). Mincle  
428 polarizes human monocyte and neutrophil responses to *Candida albicans*. *Immunol. Cell Biol.*  
429 90, 889–895.
- 430 Vijayan, V., Pradhan, P., Braud, L., Fuchs, H.R., Gueler, F., Motterlini, R., Foresti, R., and  
431 Immenschuh, S. (2019). Human and murine macrophages exhibit differential metabolic  
432 responses to lipopolysaccharide - A divergent role for glycolysis. *Redox Biol.* 22, 101147.
- 433 Villani, A.C., Satija, R., Reynolds, G., Sarkizova, S., Shekhar, K., Fletcher, J., Griesbeck, M.,  
434 Butler, A., Zheng, S., Lazo, S., et al. (2017). Single-cell RNA-seq reveals new types of human  
435 blood dendritic cells, monocytes, and progenitors. *Science* (80- ). 356.
- 436 Virtanen, P., Gommers, R., Oliphant, T.E., Haberland, M., Reddy, T., Cournapeau, D., Burovski,  
437 E., Peterson, P., Weckesser, W., Bright, J., et al. (2019). SciPy 1.0--Fundamental Algorithms for  
438 Scientific Computing in Python. *Nat. Methods* 17, 261–272.
- 439 Vlahos, K., Sourris, K., Mayberry, R., McDonald, P., Bruveris, F.F., Schiesser, J. V., Bozaoglu,

Rajab *et al.*

- 440 K., Lockhart, P.J., Stanley, E.G., and Elefanty, A.G. (2019). Generation of iPSC lines from  
441 peripheral blood mononuclear cells from 5 healthy adults. *Stem Cell Res.* **34**, 101380.
- 442 Wakioka, T., Sasaki, A., Kato, R., Shouda, T., Matsumoto, A., Miyoshi, K., Tsuneoka, M.,  
443 Komiya, S., Baron, R., and Yoshimura, A. (2001). Spred is a Sprouty-related suppressor of Ras  
444 signalling. *Nature* **412**, 647–651.
- 445 Watkins, N.A., Gusnanto, A., de Bono, B., De, S., Miranda-Saavedra, D., Hardie, D.L.,  
446 Angenent, W.G.J., Attwood, A.P., Ellis, P.D., Erber, W., et al. (2009). A HaemAtlas:  
447 characterizing gene expression in differentiated human blood cells. *Blood* **113**, e1-9.
- 448 Yamaguchi, H., Maruyama, T., Urade, Y., and Nagata, S. (2014). Immunosuppression via  
449 adenosine receptor activation by adenosine monophosphate released from apoptotic cells. *Elife*  
450 **3**.
- 451 Yurchenko, M., Skjesol, A., Ryan, L., Richard, G.M., Kandasamy, R.K., Wang, N., Terhorst, C.,  
452 Husebye, H., and Espevik, T. (2018). SLAMF1 is required for TLR4-mediated TRAM-TRIF–  
453 dependent signaling in human macrophages. *J. Cell Biol.* **217**, 1411–1429.
- 454 Zhou, J., Chan, Z.L., Bi, C., Lu, X., Chong, P.S.Y., Chooi, J.Y., Cheong, L.L., Liu, S.C., Ching,  
455 Y.Q., Zhou, Y., et al. (2017). LIN28B activation by PRL-3 promotes leukemogenesis and a stem  
456 cell-like transcriptional program in AML. *Mol. Cancer Res.* **15**, 294–303.

457

## 458 **Figure Titles and Legends**

459

### 460 **Figure 1: A reference atlas for human myeloid biology**

461 (A) iMAC atlas with samples coloured by cell type. Navy blue - monocytes, blue - macrophages,  
462 aqua -Dendritic cells, dark green - CD141+ DC, light green - CD1c+ DC, yellow - pDC, brown –  
463 granulocytes, pink stem and progenitor cells, hemogenic endothelium. (B) iMAC atlas coloured  
464 by platform: red various microarray platforms, black RNAseq platforms. (C) Validation with  
465 Haemopedia RNAseq myeloid samples: diamond shape – monocytes, circle granulocytes, cross  
466 DC. (D) Single cell projections of Villani *et al.* (2017) and Dutertre *et al.* (2019) samples onto  
467 iMAC atlas (F) Heatmap derived from Copybara analysis of Villani *et al.* (2017) and Dutertre  
468 *et al.* (2019) samples compared to iMAC cell types. Colour gradients reflect similarity of single cell  
469 clusters to iMAC atlas cell types (dark least similar, to light most similar).

470

### 471 **Figure 2: Monocytes acquire a culture phenotype**

472 (A) Schematic of rolling monocytes, highlighting cultured cells mimic many of the features of a  
473 monocyte after extravasation (B) Cultured monocytes form a distinct cluster away from *in vivo*  
474 monocytes along PC3 (C) STRING-DB network of top-ranked genes differentially expressed  
475 between peripheral blood (*in vivo*, n=107) and cultured monocytes (*ex vivo*, n=171) indicating  
476 upregulation of cytoskeletal proteins and down regulation of endothelial-adhesion proteins (D)  
477 Ranked expression (Y-axis) of gene involved in endothelial adhesion, SELL, comparing  
478 cultured monocytes (n=171) with monocytes directly profiled from blood (*in vivo*, n=107). Grey  
479 stripe indicates variance attributable to platform. P-value: Mann-Whitney-Wilcoxon rank sum  
480 test (E) Ranked expression (Y-axis) of gene involved in the regulation of RAS/RAF signaling  
481 comparing cultured monocytes (n=171) with monocytes directly profiled from blood (*in vivo*,  
482 n=107). Grey stripe indicates variance attributable to platform. P-value: Mann-Whitney-Wilcoxon  
483 rank sum test (F) iMAC atlas coloured by ranked expression of IL-6 (Scale bar: high ranked



Rajab et al.

484 expression (dark red) to low ranked expression (grey) indicating axis of activation) (G) Ranked  
485 expression (Y-axis) of Chemokine CCL2 comparing cultured monocytes (n=171) with  
486 monocytes directly profiled from blood (*in vivo*, n=107). Grey stripe indicates variance  
487 attributable to platform. P-value: Mann-Whitney-Wilcoxon rank sum test.

488

489

490 **Figure 3: Cultured and *in vitro*-derived dendritic cells do not capture aspects *in vivo***  
491 **myeloid biology**

492 (A) iMAC atlas coloured by cell source to highlight origin of dendritic cells contributes to  
493 clustering. Dark green samples are profiled directly from blood or tissue (*in vivo*); mid-green are  
494 cultured primary cells (*ex vivo*); light green are differentiated *in vitro* from cord blood or iPSC  
495 progenitors (*in vitro*). (B and C) Ranked expression (Y-axis) of (B) receptor CX3CR1 and (C)  
496 cel-fusion protein DC-STAMP *in vivo* dendritic cells (n=145), *ex vivo* dendritic cells (n=17) and *in*  
497 *vitro*-derived dendritic cells (n=57). Grey stripe indicates variance attributable to platform. P-  
498 value: Mann-Whitney-Wilcoxon rank sum test. (D) iMAC atlas coloured by ranked expression of  
499 P2RY12. (Scale bar: high ranked expression (dark red) to low ranked expression (grey)).

500

501 **Figure 4: *in vitro*-derived macrophages do not capture developmental ontogeny**

502 (A) iMAC atlas coloured by cell source to highlight *in vitro*-derived macrophages used for  
503 regression testing (B) STRING\_DB Protein-Protein network of *in vitro*-derived macrophages  
504 highlights enrichment of collagen, growth factor and cadherin networks. Line color indicates the  
505 type of interaction evidence. Light blue solid lines indicate known interactions from curated  
506 databases, solid pink line indicates known interactions that have been experimentally  
507 determined, bright green lines indicate gene neighborhood predicted interactions, red lines  
508 indicate gene fusions predicted interactions, dark blue lines indicate gene co-occurrence  
509 predicted interactions, yellow/green lines indicate textmining, black lines indicate co-expression,  
510 and light purple lines indicate protein homology. (C) Violin plots of myeloid- (n=584), pluripotent  
511 stem cell- (n=116) and hematopoietic progenitor- (n=201) derived cells comparing expression  
512 of collagen genes (COL1A1 and COL4A2)(D) mRNA-seq gene expression from human  
513 peripheral blood monocyte-derived macrophages (HMDM) (n=3) and human pluripotent stem  
514 cell derived macrophages (PSCM) (n=2) samples (C= control, S = stimulated) (E) Intracellular  
515 flow cytometry analysis of human peripheral blood monocyte-derived macrophages (HMDM)  
516 and human pluripotent stem cell derived macrophages (PSCM), representative of 2  
517 experimental repeats (n=2 HMDM, n=2 PSCM). Red = no primary antibody control, Black =  
518 isotype control, Purple = Type I Collagen stain.

519

520 **Supplementary Figure Titles and Legends**

521

522 **Supplementary Figure 1: iMAC as a reference atlas and annotation tool**

523 (A) Pre-gene filtering (left) and Post-gene filtering (right). Different platforms highlighted by  
524 different colours. (B) Kolmogorov–Smirnov (KS) statistics (y-axis) to assess the difference in  
525 gene expression distribution between pseudo-bulk single cells DC6 and bulk sample  
526 plasmacytoid dendritic cells from the atlas, with respect to the number of single cells that are  
527 aggregated (x-axis). Each line indicates one of thirty random sub-samplings with replacement



Rajab et al.

528 trial. KS statistics are calculated on each gene and averaged across all genes. A minimum KS  
529 statistic is obtained when aggregating 8 cells. (C) iMAC atlas cell types before single cell  
530 projection (D) Single cell projection of (Dutertre et al., 2019) and (Villani et al., 2017) samples  
531 onto the iMAC atlas where an 8 cells are aggregated based on (B) cells.

532

533

534

### 535 **Supplementary Figure 2: Tissue Macrophages**

536 iMAC atlas coloured by ranked expression of (A) MERTK (B) TMEM119 (Scale bar: high ranked  
537 expression (dark red) to low ranked expression (grey) (C) Ranked expression (Y-axis) of Class  
538 II transactivator (CIITA) in vivo versus in vitro-derived macrophages (gut, synovial, kupffer,  
539 microglia, macrophage). Red – activated, yellow – (Abud et al., 2017) microglia samples, khaki-  
540 Honda-Ozaki et al. (2018) macrophage samples.

541

### 542 **Supplementary Figure 3: *in vitro*-derived macrophages do not capture developmental 543 ontogeny**

544 Ranked expression (Y-axis) of genes comparing *in vivo*, *ex vivo* and *in vitro*-derived  
545 macrophages (gut, synovial, kupffer, microglia, macrophage) (A, B, C) Lipid turnover (A)  
546 cholesterol efflux (B) mitochondrial acyl-CoA dehydrogenase (C) phosphatidate phosphatase.  
547 (D) iMAC atlas coloured by ranked expression of MYB (Scale bar: high ranked expression (dark  
548 red) to low ranked expression (grey). (E) Comparison of MAF expression from *in vivo* (n=61), *ex*  
549 *vivo* (n=26) and *in vitro*- (n=96) derived macrophages (gut, synovial, kupffer, microglia,  
550 macrophage). Grey stripe indicates variance attributable to platform. (E) Comparison of LIN28B  
551 expression from *in vivo* (n=61), *ex vivo* (n=26) and *in vitro*- (n=96) derived macrophages (gut,  
552 synovial, kupffer, microglia, macrophage). Grey stripe indicates variance attributable to platform.  
553 P-value MannWhitney-Wilcoxon rank sum test.

554

555

### 556 **Tables with Titles and Legends**

#### 557 **Table1: Gene-Set Enrichment Analysis**

558 Table of the top 10 Reactome pathways enriched in genes highly correlated with *in vitro*-derived  
559 macrophage spread. Enrichment: number of genes in the list/number of genes in that pathway  
560 (False Discovery Rate-value). Genes: multiple entries assigned to the same gene indicated by  
561 underlining of gene symbol with UniProt accessions in brackets.

562

Rajab et al.

| Table 1                                                      |                   |                                                                                                                                                           |
|--------------------------------------------------------------|-------------------|-----------------------------------------------------------------------------------------------------------------------------------------------------------|
| Pathway                                                      | Enrichment        | Genes                                                                                                                                                     |
| Collagen biosynthesis and modifying enzymes                  | 11/76 (3.76e-09)  | ADAMTS3, COL1A2, COL4A2, SERPINH1, COL14A1, COL3A1, COL4A5, COL1A1, <u>COL4A1(P02462, Q03692)</u> , COL5A1                                                |
| Extracellular matrix organization                            | 18/329 (4.48e-09) | ADAMTS1, COL1A1, <u>COL4A1(P02462, Q03692)</u> , COL5A1, LTBP1, PTPRS, ADAMTS3, COL1A2, COL4A2, KDR, LUM, SERPINH1, COL14A1, COL3A1, COL4A5, LAMB1, MFAP4 |
| Collagen chain trimerization                                 | 9/44 (4.81e-09)   | COL14A1, COL3A1, COL4A5, COL1A1, <u>COL4A1(P02462, Q03692)</u> , COL5A1, COL1A2, COL4A2                                                                   |
| Collagen formation                                           | 11/104 (2.39e-08) | ADAMTS3, COL1A2, COL4A2, SERPINH1, COL14A1, COL3A1, COL4A5, COL1A1, <u>COL4A1(P02462, Q03692)</u> , COL5A1                                                |
| ECM proteoglycans                                            | 10/79 (2.39e-08)  | COL1A1, COL4A1, COL5A1, PTPRS, COL1A2, COL4A2, LAMB1, COL3A1, COL4A5, LUM                                                                                 |
| Non-integrin membrane-ECM interactions                       | 9/61 (3.83e-08)   | COL1A1, <u>COL4A1(P02462, Q03692)</u> , COL5A1, COL1A2, COL4A2, LAMB1, COL3A1, COL4A5                                                                     |
| Integrin cell surface interactions                           | 10/86 (3.83e-08)  | COL1A1, <u>COL4A1(P02462, Q03692)</u> , COL5A1, COL1A2, COL4A2, KDR, COL3A1, COL4A5, LUM                                                                  |
| Assembly of collagen fibrils and other multimeric structures | 9/67 (6.95e-08)   | COL14A1, COL3A1, COL4A5, COL1A1, <u>COL4A1(P02462, Q03692)</u> , COL5A1, COL1A2, COL4A2                                                                   |
| Collagen degradation                                         | 9/69 (7.93e-08)   | COL14A1, COL3A1, COL4A5, COL1A1, <u>COL4A1(P02462, Q03692)</u> , COL5A1, COL1A2, COL4A2                                                                   |
| Degradation of the extracellular matrix                      | 11/148 (3.73e-07) | ADAMTS1, COL1A2, COL4A2, LAMB1, COL14A1, COL3A1, COL4A5, COL1A1, <u>COL4A1(P02462, Q03692)</u> , COL5A1                                                   |

563

564 **Supplementary Tables and Legends**

565

566 **Supplementary Table 1: *in vivo* vs. *ex vivo* monocytes**

567 Comparison of gene expression of *ex vivo* (n=171) and *in vivo* (n=107) monocytes. Columns  
 568 refer to gene symbols, P-values re-calculated by Mann-Whitney-Wilcoxon rank-sum test, mean  
 569 and standard deviation.

570

Rajab et al.

571 **Supplementary Table 2: *in vivo* vs. *in vitro* macrophages**

572 Comparison of gene expression of *in vivo* (n=61) and *in vitro*- (n=96) derived macrophages (gut,  
573 synovial, kupffer, microglia, macrophage). Columns refer to gene symbols, P-values  
574 recalculated by Mann-Whitney-Wilcoxon rank-sum test, mean and standard deviation.

575

576 **Supplementary Table 3: *in vivo* vs. *ex vivo* vs. *in vitro* macrophages**

577 Comparison of gene expression of *in vivo* (n=61), *ex vivo* (n=26) and *in vitro*- (n=96) derived  
578 macrophages (gut, synovial, kupffer, microglia, macrophage). Columns refer to gene symbols,  
579 P-values re-calculated by Mann-Whitney-Wilcoxon rank-sum test, mean and standard deviation.

580

581 **Supplementary Table 4: dendritic cells**

582 Comparison of gene expression of *in vivo* (n=145), *ex vivo* (n=17) and *in vitro*- (n=57) derived  
583 dendritic cells. Columns refer to gene symbols, P-values re-calculated by Mann-  
584 WhitneyWilcoxon rank-sum test, mean and standard deviation.

585

586 **Supplementary Table 5: *in vivo* vs. *ex vivo* vs. *in vitro* microglia**

587 Comparison of gene expression of *in vivo* (n=10), *ex vivo* (n=21) and *in vitro*- (n=43) derived  
588 microglia. Columns refer to gene symbols, P-values re-calculated by Mann-Whitney-Wilcoxon  
589 rank-sum test, mean and standard deviation.

590

591 **Supplementary Table 6: Datasets and samples to compile iMAC atlas and single cell  
592 projection**

593 Tissue resident macrophages and dendritic cells from peripheral blood, spleen, thymus, joint,  
594 lung, gut, brain and liver. Samples also included monocytes from peripheral and cord blood, as  
595 well as *in vitro* differentiated DCs from cord blood progenitors or monocyte-derived  
596 macrophages. Columns include dataset accession ID, platform, Stemformatics Dataset ID,  
597 number of samples, tier categorization, cell type and relevant tissue/organism part.

598

599 **Additional Supplementary Material**

600

601 **Supplementary Video**

602 Active engulfment and clearance of cells by pluripotent stem cell-derived macrophages.

603

604 **Methods**

605 Atlas formation was developed as described in (Angel et al., 2020) and is comprised of 44  
606 datasets, 901 samples and 3757 genes. Mapping, and analysis of microarray and RNA  
607 sequencing datasets were conducted in the Stemformatics platform. Scripts are available for  
608 download from the Stemformatics BitBucket (Choi et al., 2019a)). All datasets and relevant  
609 samples (Supplementary Table 6) passed stringent quality control checks required for hosting  
610 on the stemformatics platform. Quality control checks include evaluation of library quality, and  
611 inclusion of replicates associated with experimental design. These datasets were either already  
612 hosted on stemformatics, or were downloaded from public depositories and processed through  
613 the stemformatics pipeline for inclusion.

614

Rajab et al.

### 615 Platform Effect Analysis and Gene Selection for PCA

616 This method assesses each gene independently for a dependence upon experimental platform.  
617 The initial step is to transform expression values from RNA Sequencing and Microarray into  
618 percentile values. The second step uses a univariate estimate of gene platform dependence  
619 and then selects genes with a small ratio of platform dependent variance to total variance.  
620 These genes are used to run the PCA (3757 genes passed this cut). The threshold for gene  
621 selection is empirically determined by using the Kruskal Wallis H Test to assess the difference  
622 in platform expression distribution for each principal component. A platform variance fraction of  
623 0.2 is found to remove the platform effect for the first three principal component. For further  
624 details, please refer to (Angel et al., 2020).

625

### 626 Quantification and Statistical Analysis

627 P-values were re-calculated using the Mann-Whitney-Wilcoxon rank-sum test (two-sided). This  
628 was implemented via the python (version 3.7.5) SciPy package (version 1.3.1)(Virtanen et al.,  
629 2019). Multiple testing over the set of genes was accounted for with Bonferroni correction  
630 implemented in the statsmodels package (Seabold and Perktold, 2010)

631

### 632 Pseudo-bulk samples from Villani's Single Cell Data

633 Single cells were aggregated to form pseudo-bulk samples to mitigate library size differences  
634 between single cell and bulk data, and to project samples onto the atlas. Each group of (known)  
635 cell type in the single cell data was randomly sampled for  $k$  single cells with replacement.  
636 Aggregation consisted in summing up their expression profiles.  $k$  was determined by the  
637 number of sampling (i.e. how many pseudo-bulk samples for each cell type) as half of the cell  
638 type's population size. The optimum aggregation size  $k$  was investigated by evaluating the  
639 similarity in distribution between the atlas' plasmacytoid dendritic cells and the aggregated  
640 pseudo-bulk DC6 samples using Kolmogorov–Smirnov (KS) statistic  $D$  averaged across all  
641 genes. KS statistic measured the difference between the empirical cumulative distribution  
642 functions of two groups of samples; the smaller the value, the closer the aggregated DC6  
643 resembled the reference transcriptional profiles from the pDC in the bulk atlas. A minimum  $D$   
644 value was obtained for  $k = 8$  across 30 iterations (Supplementary Figure 1). Similar results were  
645 obtained for other cell types. Thus, every pseudo-bulk samples were aggregated from 8 single  
646 cells.

647

### 648 Capybara Cell Score

649 Capybara (Kong et al., 2020) cell scores was used to measure cell identities continuum of the  
650 pseudo-bulk samples using iMac as the reference. Capybara cell scores were calculated by  
651 performing restricted linear regression of reference iMac samples on each of the pseudo-bulk  
652 samples' expression profiles. Denote  $y_i$  the expression profile of the  $i^{th}$  pseudo-bulk sample of  
653 length  $G$ , where  $G$  represents the total number of genes in the data, and  $X$  a  $(G \times T)$  the  
654 reference iMac matrix, where  $T$  represents the number of known cell types of interest. We  
655 considered 5 cell types: Dendritic cell, Monocyte, CD141+ dendritic cell, CD1c+ dendritic cell  
656 and Plasmacytoid dendritic cells.  $X$  is obtained by averaging the expression profiles of the iMac  
657 samples according to their cell types. Capybara solves the optimization problem

658

$$\operatorname{argmin}_{\beta} (y_i - X\beta_i)^T (y_i - X\beta_i)$$

Rajab et al.

659 under the constraint that

$$\beta_{it} > 0 \quad \forall t \in \{1, 2, \dots, T\}, \quad \sum_t^T \beta_{it} < 1$$

660  
661 where  $\beta_{it}$  is a regression coefficient, or cell score, for each pseudo-bulk sample  $i$  and each  
662 iMac cell type  $t$ . The cell score is obtained using quadratic programming implemented with R  
663 (version 3.6.2) package *quadprog* (version 1.5-8)(Turlach and Weingessel, 2019).

#### 664 Enrichment analysis and Protein-Protein Network

665 An enrichment analysis was conducted on the top 92 genes ranked by Pearson correlation  
666 ( $\geq 0.7$ ) along the upward axis including invitro-derived cells. Enriched pathways were identified  
667 using these genes at Reactome (Fabregat et al., 2018) and significance ranked by p-value/false  
668 discovery rate. A protein-protein network was generated using the top 92 genes on STRING-DB  
669 (Szklarczyk et al., 2019). Disconnected nodes are not shown.

#### 670 671 Pluripotent Stem Cell Differentiation

672 Stem cell work was carried out in accordance with The University of Melbourne ethics  
673 committee HREC (approval 1851831). Stem cell lines used were PB001.1 (Vlahos et al., 2019),  
674 a kind gift from the Stem Cell Core Facility at the Murdoch Children's Research Institute, and  
675 HDF51 (Jones et al., 2013) was kindly provided to ALL by Prof. Jeanne Loring (The Scripps  
676 Research Institute, CA, USA). Human pluripotent stem cells were differentiated into  
677 macrophages based on protocol described by (Joshi et al., 2019; Ng et al., 2008), with  
678 modifications. Modifications were as follows: embryoid bodies were kept in rotational cultures  
679 without transference to matrigel plates for adherence, and the collection of progenitors from  
680 week 2 were immediately re-suspended in RPMI-1640 containing L-Glutamine (Life  
681 Technologies) and 10% Fetal Bovine Serum for macrophage differentiation (see macrophage  
682 differentiation).

#### 683 684 Monocyte isolation from peripheral blood

685 Buffy Coat was obtained from the Australian Red Cross Blood Service in accordance with The  
686 University of Melbourne ethics committee HREC (approval 1646608). The blood was diluted  
687 with PBS at a 1:3 dilution and underlayered with Ficoll-Hypaque. The underlayered blood samples  
688 were centrifuged at 350g for 30 minutes at 24°C with no brake. Peripheral blood mononuclear  
689 cells were isolated from the interphase and washed twice by using MACs buffer (DPBS, 0.5%  
690 heat inactivated Fetal Bovine Serum, 2mM EDTA) and centrifuging at 400g for 5 minutes at  
691 4°C. Cells were centrifuged at 400g for 5 minutes at 4°C and resuspended in 40µl MACs buffer  
692 per 107 cells. Monocytes were positively selected by a magnetic field using Human  
693 CD14 MicroBeads (MACS Miltenyi Biotec) and LS Columns (Miltenybiotec). These cells were  
694 plated for macrophage differentiation (see Macrophage differentiation

#### 695 696 697 Macrophage differentiation

698 Monocytes/progenitor cells were cultured in tissue-culture treated 6 well plates. Cells were  
699 cultured in RPMI-1640 medium containing L-Glutamine (Life Technologies) with 10% Fetal  
700 Bovine Serum and 100ng/ml recombinant Human M-CSF (R&D Systems; 216-MC) for 5 days.  
701 Media changes were carried out on day 4.

#### 702 703 Flow Cytometry

704 HMDM and PSCM were collected and centrifuged at 400g for 5 minutes. Supernatant was  
705 aspirated and 5µl mouse serum was added to 'dry' pellets for 5 minutes on ice. Cells were



Rajab et al.

706 resuspended in FACS Buffer (Hanks Balanced Salt Solution, 0.5% Human Serum Albumin) and  
707 stained with CD14 or matched isotype control antibodies on ice for 20 minutes then washed  
708 twice (3ml FACS Buffer, spun at 400g, 5 minutes). Resuspended cells were fixed with 4%  
709 paraformaldehyde (PFA) for 15 minutes at room temperature. PFA was washed out and cells  
710 rinsed twice in FACS buffer before resuspending in PBS and stored overnight at 4°C. Fixed  
711 cells were permeabilized with 0.1% Triton X-100 (in 1XPBS) for 10 minutes at room temperature  
712 and washed twice. Blocking buffer (0.3M glycine buffer, 10% Goat Serum, 1XPBS) was added  
713 to 'dry' pellets on ice for 1 hour. Cells were stained with antibodies to Type I Collagen or  
714 matched isotype control on ice for 20 minutes. Cells were washed twice then incubated with  
715 secondary antibody for 20 minutes on ice in the dark. Cells were then washed twice and  
716 resuspended for analysis on a CytoFLEX S flow cytometer (Beckman Coulter, Brea, CA) using  
717 CytExpert acquisition software. Post-acquisition analysis was performed with FCS Express 7  
718 flow cytometry software.  
719

| Flow Cytometry antibodies        |                                                                       |
|----------------------------------|-----------------------------------------------------------------------|
| CD14                             | Brilliant Violet 421™ anti-Human CD14 (BioLegend: Cat. No. 325628)    |
| CD14 Isotype                     | Brilliant Violet 421™ Mouse IgG1 (BioLegend: Cat. No. 400157)         |
| Type I Collagen Primary antibody | Rabbit Anti-Collagen I antibody (Abcam: Cat. No. ab264074)            |
| Secondary Antibody               | Goat Anti-Rabbit IgG H&L (Alexa Fluor®488) (Abcam: Cat. No. ab150077) |
| Type I Collagen Isotype          | Rabbit IgG monoclonal Isotype Control (Abcam: Cat. No. 172730)        |

720

#### 721 Stimulation Assay

722 On day 5 of differentiation, one well containing peripheral blood monocyte- or human pluripotent  
723 stem cell-derived macrophages were stimulated with 10ng/ml Lipopolysaccharide (LPS) (Sigma-  
724 Aldrich; *Salmonella enterica* serotype minnesota) for 2 hours. After stimulation period, media  
725 was aspirated, and the wells were washed twice with PBS (Ca<sup>2+</sup>+Mg<sup>2+</sup> free). before cell lysis  
726 using 2-mercaptoethanol (Sigma-Aldrich) and RNeasy Plus Lysis Buffer (Qiagen). Samples  
727 were placed into Eppendorf's and stored at -80°C before RNA extraction.  
728

#### 729 RNA extraction

730 Total RNA was isolated using the RNeasy® Plus Mini Kit (Qiagen) according to manufacturer's  
731 instructions. In summary: for the removal of genomic DNA, samples were placed into gDNA  
732 columns and centrifuged for 30 seconds at 8000g. Ethanol (70%) was mixed with the flow  
733 through and samples were transferred to RNeasy spin columns. The columns were centrifuged  
734 for 15 seconds at 8000g. Buffer RW1 was then added to the columns and columns were  
735 centrifuged for 15 seconds at 8000g. Buffer RPE was added to the columns and columns were  
736 centrifuged for 15 seconds. Buffer RPE was again added to the columns with centrifugation at  
737 8000g for 2 minutes. Columns were then placed into new collection tubes and centrifuged at full  
738 speed for 1 minute to dry the membrane. RNase-free water was then added directly onto the  
739 column membrane and columns placed into Eppendorf's and centrifuged at 8000g for 1 minute  
740 to collect RNA. RNA quality and quantity were determined using a TapeStation (Agilent  
741 Technologies 2200). Samples were stored at -80°C. Zymo Research RNA Clean &

*Rajab et al.*

742 Concentrator-25 Kit was used to pool replicates (from the same donor) together and elute in  
743 elute into smaller volume with maximum concentration.

744

745 RNA sequencing

746 RNA samples were processed by the Ramaciotti Centre for Genomics (University of New South  
747 Wales; Sydney). Illumina Novaseq\_6000 was used for mRNA-sequencing.

748

749 Data and Code Availability

750 mRNA-sequencing data is available through accession GSE150893. All public accessions are  
751 listed in Supplementary Table 6. Stemformatics code is publicly available  
752 at [bitbucket.org/stemformatics](http://bitbucket.org/stemformatics). Atlas code is available  
753 at [bitbucket.org/stemformatics/s4m\\_pyramid/src/master/scripts/atlas.py](http://bitbucket.org/stemformatics/s4m_pyramid/src/master/scripts/atlas.py).

754

755 Graphing software and Illustration

756 Graphs for mRNA-seq gene expression were generated using Graphpad Prism. Violin plots  
757 were generated through the [www.stemformatics.org](http://www.stemformatics.org) platform. Schematic Figure illustration  
758 created with BioRender.com

(A)

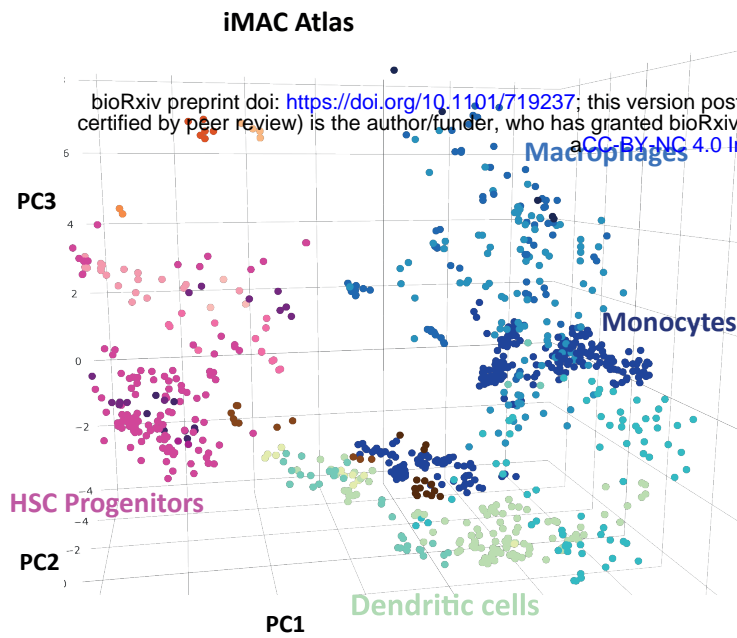

(B)

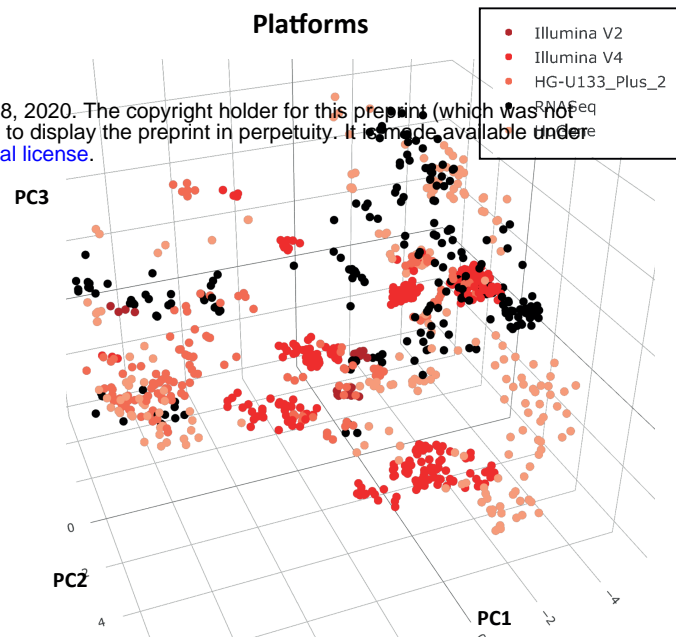

(C)

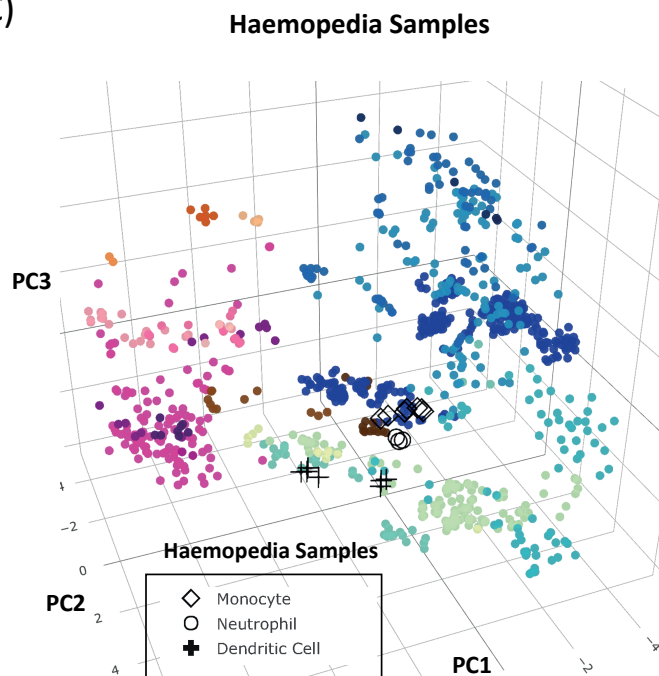

(D)

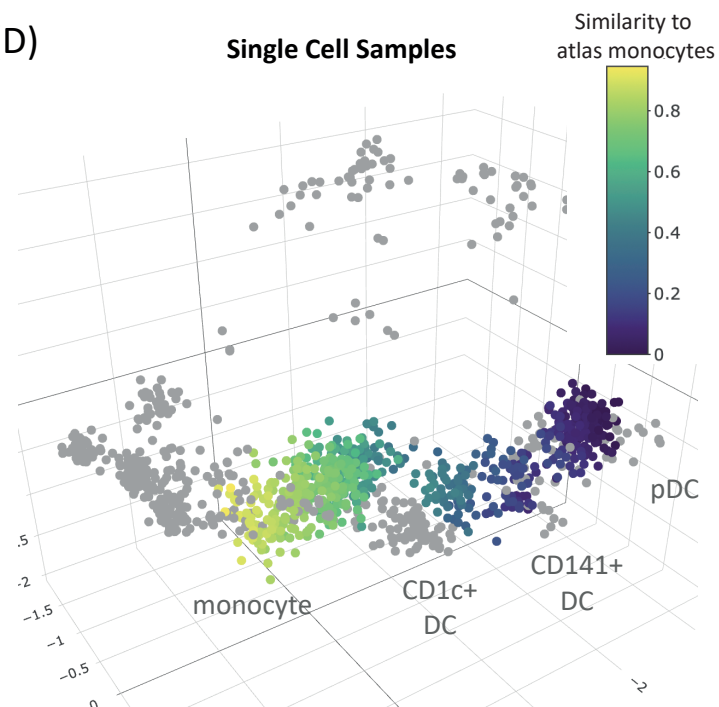

(E)

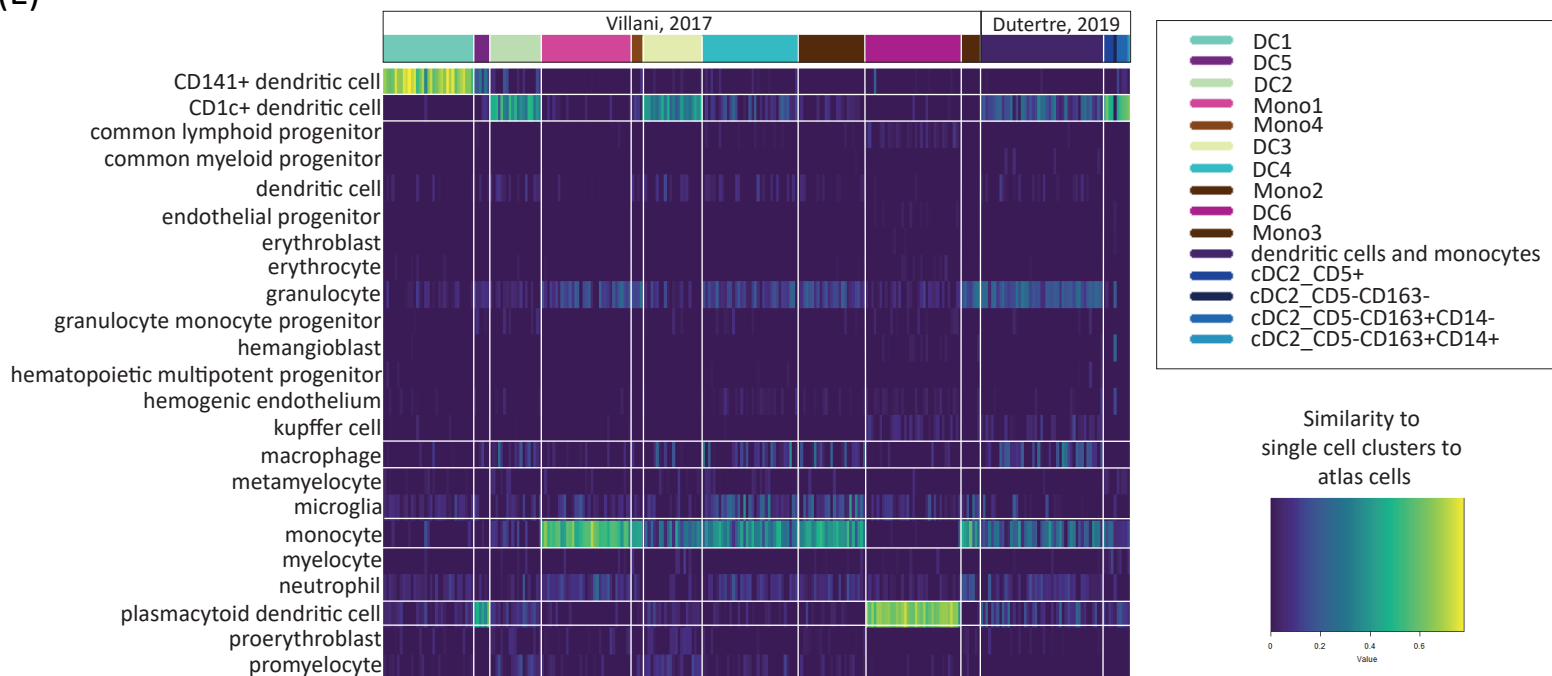

**Figure 1: A reference atlas and annotation tool for human myeloid biology**

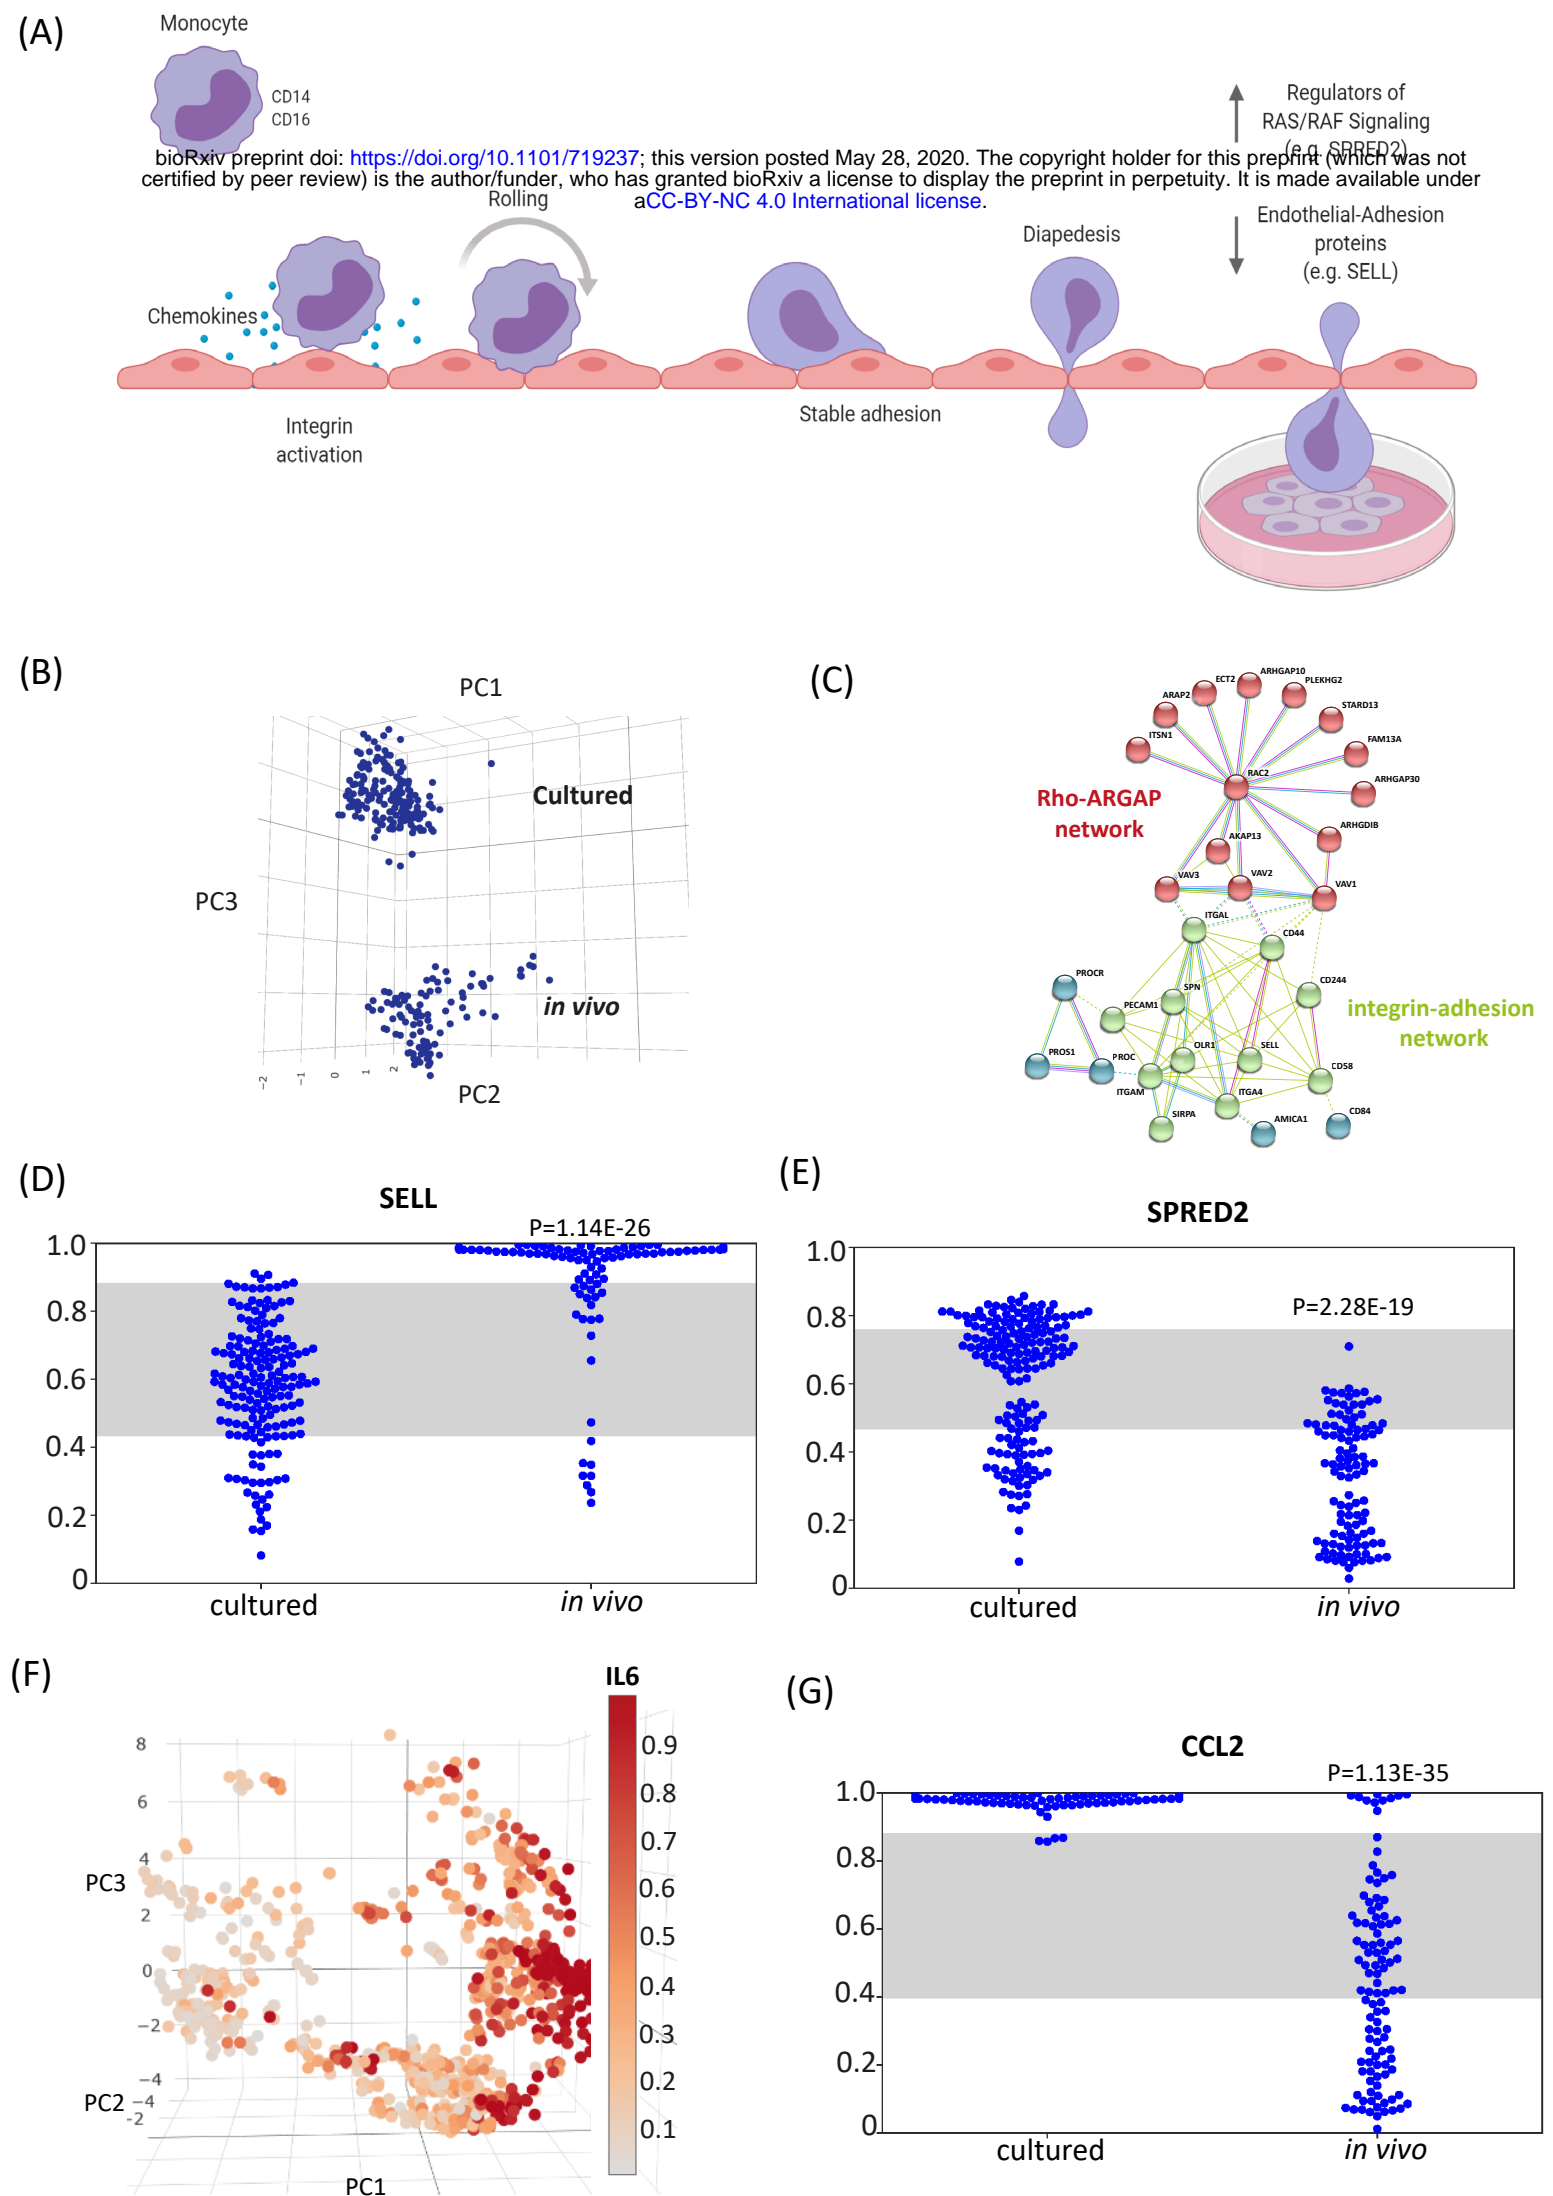

**Figure 2: Monocytes acquire a culture phenotype**

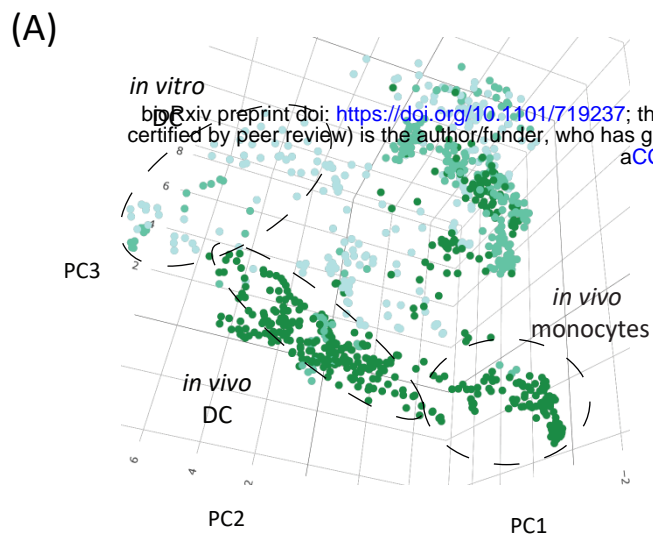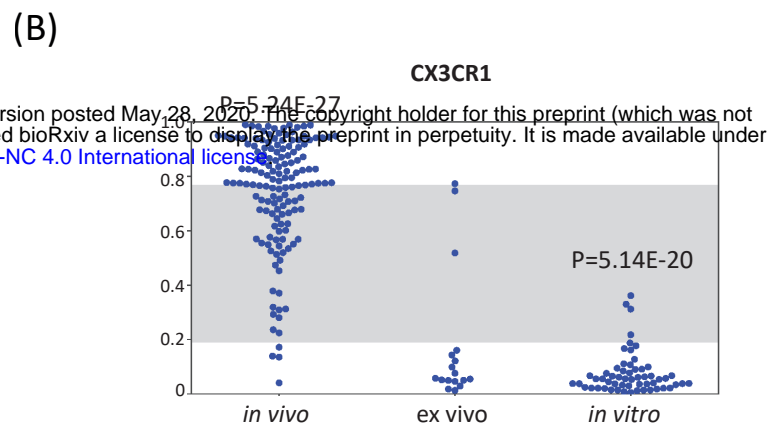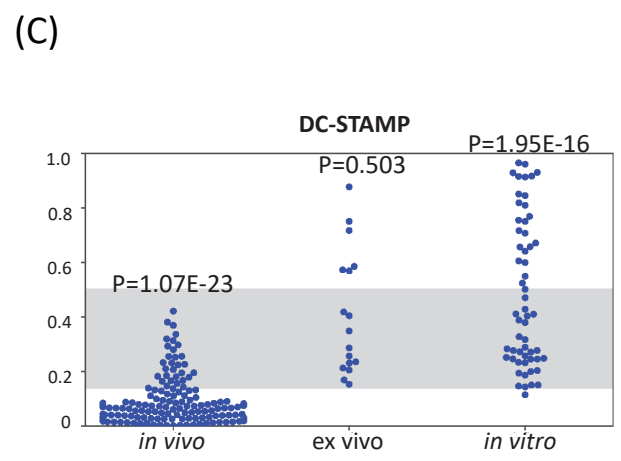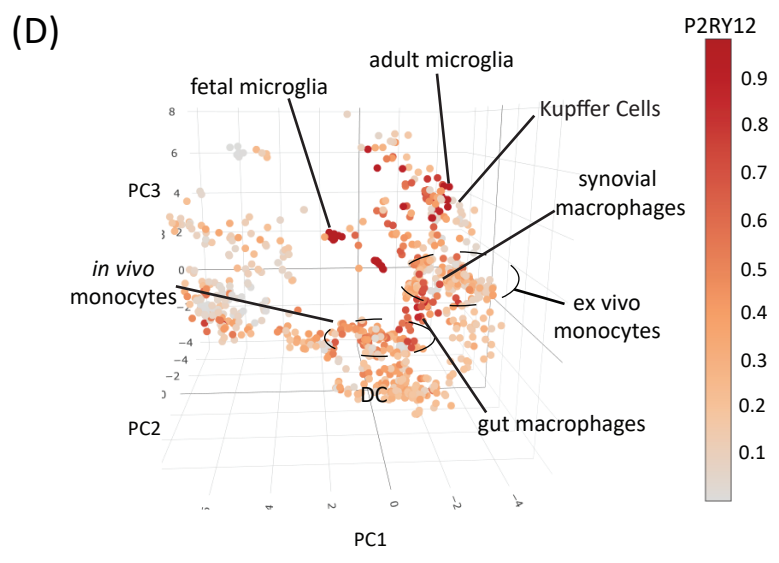

Figure 3: Cultured and *in vitro*-derived dendritic cells do not capture aspects of *in vivo* myeloid biology



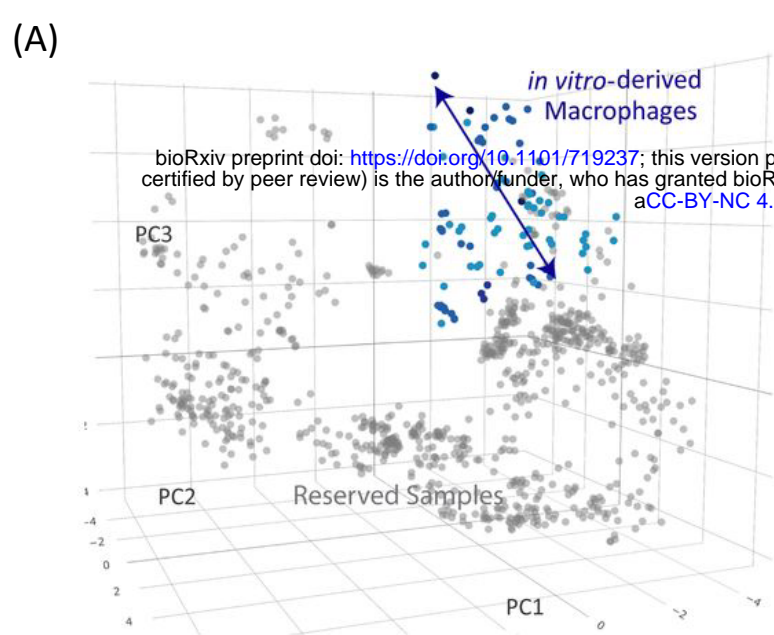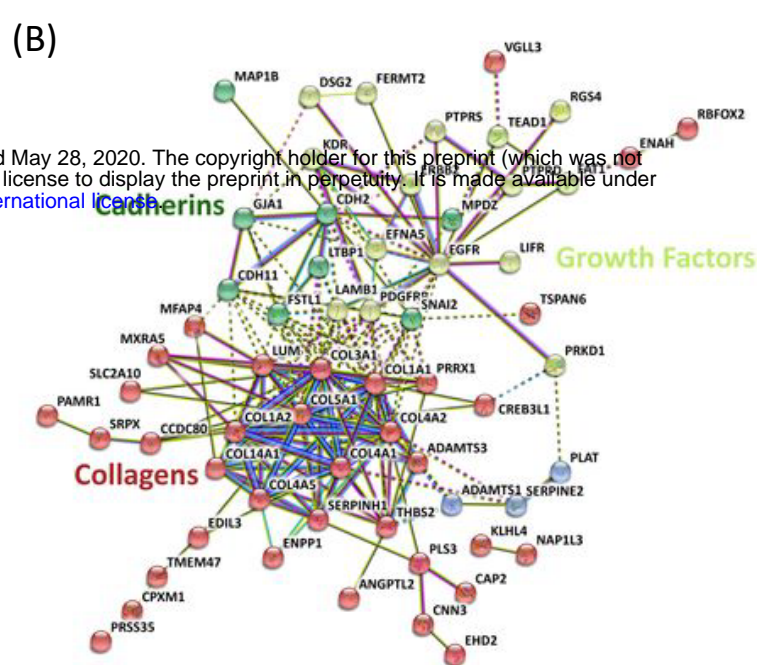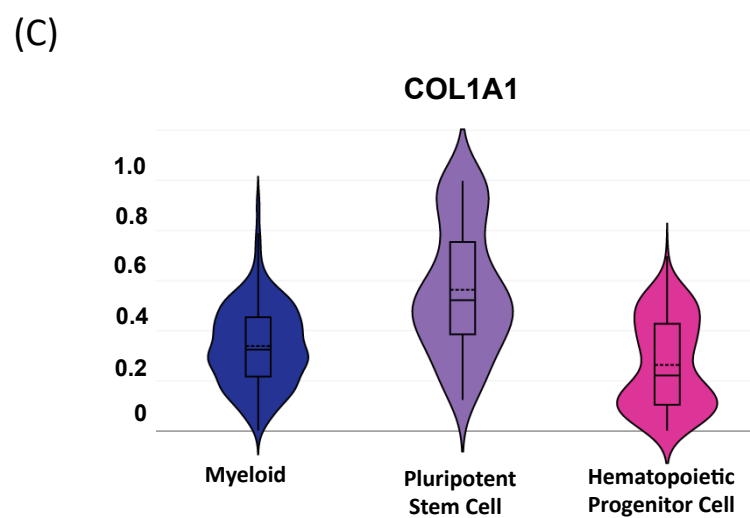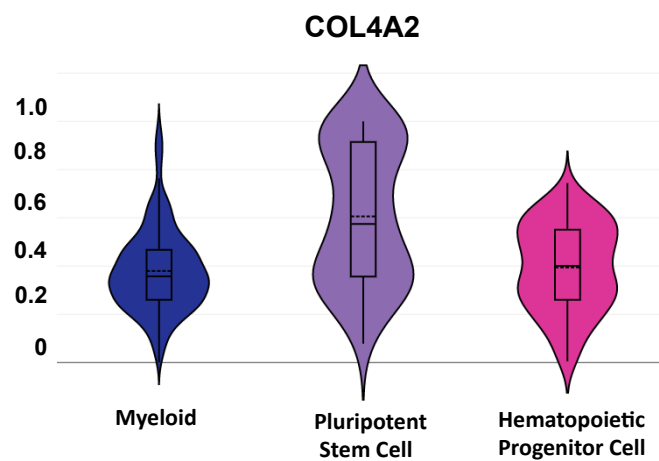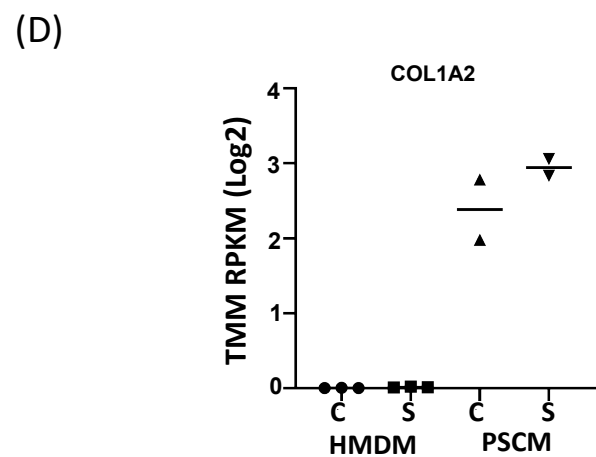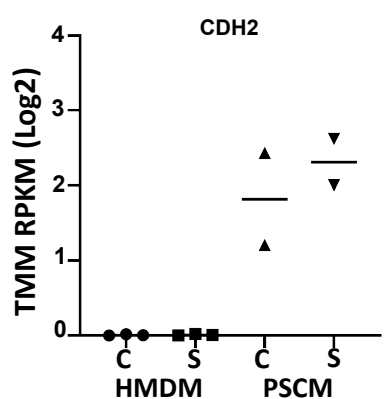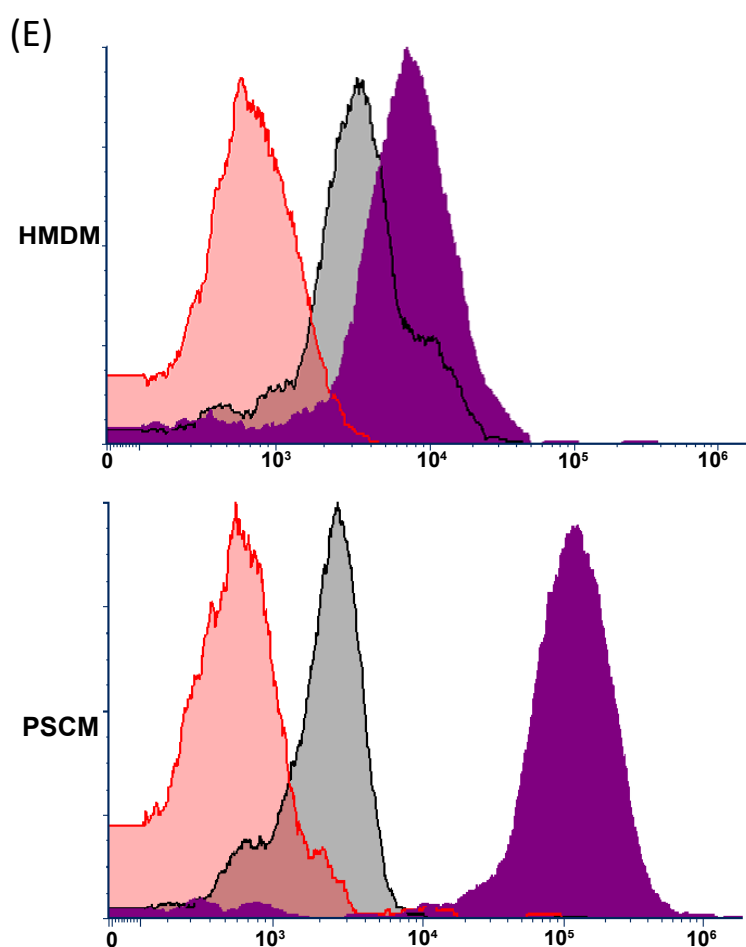

Figure 4: PSC-Macrophages display phenotype enriched for collagen production
