Rajab et al.

## An integrated analysis of myeloid cells identifies gaps in *in vitro* models of *in vivo* biology

Nadia Rajab<sup>1,2</sup>, Paul W Angel<sup>1</sup>, Yidi Deng<sup>1,3</sup>, Jennifer Gu<sup>1</sup>, Vanta Jameson<sup>4</sup>, Mariola Kurowska-Stolarska<sup>5</sup>, Simon Milling<sup>5</sup>, Chris M Pacheco<sup>1</sup>, Matt Rutar<sup>1</sup>, Andrew L Laslett<sup>6,7</sup>, Kim Anh Lê Cao<sup>3</sup>, Jarny Choi<sup>1</sup> and Christine A Wells\*<sup>1</sup>.

### AFFILIATIONS:

1. The Centre for Stem Cell Systems, Faculty of Medicine, Dentistry and Health Sciences, The University of Melbourne, 30 Royal Parade Parkville, Victoria 3010, Australia.
2. CSIRO Synthetic Biology Future Science Platform
3. Melbourne Integrative Genomics, School of Mathematics and Statistics, Faculty of Science, The University of Melbourne, 30 Royal Parade Parkville, Victoria 3010, Australia
4. Melbourne Cytometry Platform (MBC node), Department of Anatomy and Neuroscience, University of Melbourne
5. The Institute of Infection, Immunity and Inflammation, Research into Inflammatory Arthritis Centre 'Versus Arthritis' (RACE), University of Glasgow, Glasgow, United Kingdom.
6. CSIRO Manufacturing, Clayton, Victoria 3168, Australia
7. Australian Regenerative Medicine Institute, Monash University, Victoria 3800, Australia.

\*CORRESPONDING AUTHOR email [wells.c@unimelb.edu.au](mailto:wells.c@unimelb.edu.au)

[Key words: monocyte, macrophage, dendritic cell, microglia, kupffer cell, tissue resident macrophage, hematopoietic progenitor, monocyte-derived macrophage, pluripotent stem cell-derived macrophage.]

### Summary:

The Stemformatics myeloid atlas is an integrated transcriptome atlas of human macrophages and dendritic cells that systematically compares freshly isolated tissue-resident, cultured, and stem-cell derived myeloid cell types. We identified two broad classes of tissue-resident macrophages with lung, gut and tumour-associated macrophages most similar to monocytes. Microglia, Kupffer cells and synovial macrophages shared similar profiles with each other, and with cultured macrophages. Pluripotent stem cell-derived macrophages were not reminiscent of fetal-derived cells. Instead, they were characterized by atypical expression of collagen and a highly efferocytotic phenotype. Likewise, Flt3L-derived cord blood dendritic cells were distinct from conventional dendritic cell subsets isolated from primary tissues and lacked expression of key pattern recognition receptors. Myeloid subsets were reproducible across different experimental series, showing the resource is a robust reference for new data. External users can annotate and benchmark their own samples, including annotation of myeloid single cell data at [www.stemformatics.org/atlas/myeloid/](http://www.stemformatics.org/atlas/myeloid/).

Rajab et al.

## 1 **Introduction**

2 Macrophages are innate immune cells that are found resident in every tissue, with roles in tissue  
3 homeostasis, and response to infection or injury. The distinct functional roles of tissue  
4 macrophages are reflected in their transcriptional phenotypes: atlases of tissue-resident mouse  
5 macrophages, for example, have given great insight into their complexity and heterogeneity  
6 (Gautier et al., 2012; Gosselin et al., 2017). Individual transcriptome studies have played an  
7 essential role in unravelling the importance of the environment on macrophage phenotype and  
8 function (reviewed by (Huang and Wells, 2014)). These data evidence the shared molecular  
9 pathways of myeloid cells responding to pathogenic challenge, and the receptiveness of  
10 macrophages to environmental cues.

11  
12 Much of our understanding of macrophage biology, including many of the molecular mechanisms  
13 of innate immune signaling, have arisen from mouse gene knock-out studies. However, cross-  
14 species comparisons of immune cells highlight differences between mouse and man. These  
15 include the glycolytic switch associated with metabolic reprogramming in activated mouse  
16 macrophages (Vijayan et al., 2019); divergent patterns of pathogen receptor expression (Vijayan  
17 et al., 2012) and transcriptional responses to innate immune stimuli (Schroder et al., 2012). Cross-  
18 species comparisons are further hampered by the absence of population level immune-activation  
19 maps, with most mouse studies in macrophage biology conducted on a limited number of inbred  
20 lines.

21  
22 The need for improved molecular models of primary human cells is evident from the rising  
23 popularity of single cell transcriptomic atlases, exemplified by the human cell atlas consortium  
24 (Hay et al., 2018; Regev et al., 2017). However, unbiased profiling of cells also requires  
25 computational predictions of cell identity, raising further questions about how best to accurately  
26 identify immune cell populations resident in tissues, and discriminate these from circulating or  
27 infiltrating peripheral blood cells. The isolation, and identification of tissue-resident myeloid cells  
28 can be particularly fraught if populations are rare or hard to isolate using enzymatic or other  
29 dissociation methods. These procedures can alter myeloid transcriptomes (Gosselin et al., 2017),  
30 resulting in underrepresentation or phenotypic ambiguity of resident macrophages in single cell  
31 maps of a tissue. It might be argued that human macrophages suffer from an identity crisis, relying  
32 on equivalency to laboratory models of human macrophage biology such as *ex-vivo* culture of  
33 monocyte-derived macrophages, which may not be appropriate as a benchmark for specialized  
34 tissue functions.

35  
36 The potential to model tissue residency, disease phenotypes and activation status of human  
37 macrophages using pluripotent stem cells (PSC) is a growing area of interest (Reviewed (Lee et  
38 al., 2018; Rajab et al., 2018)). However, the anatomical context or developmental ontogeny of  
39 these cells is still not well understood, nor their capacity to model specialized behaviors of myeloid  
40 cells including roles within a tissue niche. While databases such as BloodSpot (Bagger et al.,  
41 2016) and Haematlas (Watkins et al., 2009) provide a useful snapshot of gene expression of  
42 blood types, these lack depth with regard to tissue representation, common laboratory models or  
43 activating stimuli. Consequently, comparisons of new models of human macrophage biology rely  
44 on ad hoc comparisons that do not adequately benchmark their similarity to the diversity of

Rajab et al.

45 possible macrophage phenotypes. Our motivation, therefore, was to construct a reference atlas  
46 of human myeloid biology that draws on important studies already in the public domain, and that  
47 can be added to by the research community as new cell models or new profiling platforms become  
48 available. Here, we describe an integrated myeloid transcriptome atlas to identify, benchmark and  
49 analyze human myeloid subpopulations from *ex vivo*, *in vivo* and *in vitro* sources. The atlas is  
50 made available as an interactive online resource <https://www.stemformatics.org/atlas/myeloid>.

51

### 52 **A reference atlas for human myeloid biology.**

53 We first compiled a reference transcriptional atlas (Figure 1A and Table S1) from public and  
54 proprietary transcriptomic data from 44 studies and ~900 samples representing peripheral blood  
55 monocytes, tissue-resident, *ex vivo* and *in vitro*-derived macrophages and dendritic cells.  
56 Samples were curated with respect to phenotype, source and isolation method. Datasets were  
57 processed through the Stemformatics pipeline which includes a stringent set of quality control  
58 requirements for hosting on the Stemformatics.org portal (Choi et al., 2019a). We constructed the  
59 atlas by implementing a two-step process (Angel et al., 2020). Firstly, transformation of  
60 expression values from the original studies to percentile values to facilitate the comparison of  
61 different experimental series was performed. Secondly, using a univariate estimation of their  
62 platform dependence, genes whose expression values were significantly impacted by the way  
63 that they were measured were removed from the atlas. This approach led to reproducible  
64 clustering of distinct myeloid classes on a PCA (Figure 1, Figure S1A). The reproducibility of  
65 myeloid subsets including dendritic cells, monocytes and neutrophils was validated by projecting  
66 an independent RNAseq dataset of well annotated blood cell types from Haemopedia (Choi et al.,  
67 2019b) (Figure 1A). Variables such as progenitor source (hematopoietic progenitor cell-, myeloid-  
68 , or pluripotent stem cell (PSC)-derived); gene expression (Figure 1B) or culture status (Figure  
69 1C) contributed to clustering of samples. Patterns of gene expression allow users to assess  
70 markers of myeloid subsets, such as the expression of *TREM1* on monocytes, monocyte-derived  
71 macrophages (MDM), alveolar macrophages and CD1c+ dendritic cells (DC2) (Figure 1B and  
72 Table 1).

73

### 74 **Two broad classes of tissue resident macrophage span either side of a monocyte border**

75 Isolation of primary tissue-resident macrophages is particularly difficult as this can result in  
76 alterations in phenotype (Gosselin et al., 2017). The difficulty of isolating tissue-resident  
77 populations from healthy human tissue is evident from the spread of tissue resident macrophages  
78 in comparison to tissue-resident dendritic cells (Figure 1), noting that several of the macrophage  
79 datasets were obtained through surgical biopsies from patients with inflammatory disease, and  
80 indeed mapped across the inflammatory axis. Tissue resident macrophages, including Kupffer  
81 cells, microglia, alveolar macrophages, gut and synovial macrophages occupy a broad niche on  
82 the atlas between dendritic cells, peripheral blood monocytes, and cultured monocytes (Figure 1  
83 and Figure S1). Although there was no discrete partitioning of macrophages from individual  
84 tissues, distinct classes of tissue resident macrophages were observed in the atlas – (the alveolar,  
85 colon and macrophages isolated from tumour ascites (TAM) (Figure S1C) grouped together  
86 between cultured monocytes and CD1c+ dendritic cells, and a second spread containing synovial  
87 macrophages, microglia and Kupffer cells aligned with the iPSC-derived cells.

88

Rajab et al.

## 89 **DC differentiated from cord blood lack an *in vivo* equivalent.**

90 Circulating and tissue resident dendritic cells (DCs) occupy a distinct transcriptional niche from  
91 monocytes or macrophages. *In vitro*-differentiated dendritic cells, expanded from cord blood  
92 progenitors with FLT3L, do not resemble *in vivo* conventional DCs (DC1 or DC2; Figure 1B, Figure  
93 2A), but are part of an activation axis shared by DC and macrophages. The hallmark of *in vitro*-  
94 DCs are low expression of receptors such as *CX3CR1*, *IL18R1* and *TLR7* (Figure 2B, 2C and  
95 Table S2). Other molecules, such as the cell-fusion protein *DC-STAMP* are gained in culture  
96 (Figure 2C and Table S2). These cells are also closely associated with MDMs, which may  
97 contribute to some of the confusion in the literature about their ontogeny. It is unlikely that this is  
98 due to the cord blood origins of the majority of these datasets, as CD45+ cells isolated from cord  
99 blood engrafted into humanized mice are also included in the atlas (Minoda et al., 2017) and these  
100 recapitulate *in vivo* DC1 and DC2 transcriptional phenotypes.

101  
102 The cDCs form distinct clusters along the activation axis of the atlas. This includes blood samples  
103 taken from donors after vaccination (Banchereau et al., 2014) or cells isolated from inflammatory  
104 fluids (Segura et al., 2013) and we speculate that these represent distinct and reproducible  
105 activation phenotypes. To further evaluate DC subtypes we projected two single cell RNAseq  
106 datasets describing blood monocytes and dendritic cells (Villani et al., 2017) and (Dutertre et al.,  
107 2019) using the myeloid atlas as the reference (Figure 2D, Figure S2). We confirmed the original  
108 observation of a new *AXL+* *SIGLEC6+* (AS-DC) subset that shared classical cell surface markers  
109 with plasmacytoid DCs (pDCs) and DC1s (Figure 2E). AS-DCs were suggested to be the subset  
110 contaminating traditional pDC isolation strategies, responsible for observations that pDC can  
111 stimulate T-cells (Villani et al., 2017). There has been some dispute between the Villani and  
112 Dutertre studies on the identity of DC2 subsets (Dutertre et al., 2019). An advantage of projecting  
113 both datasets to the same reference is that the subtypes can be evaluated against a broader set  
114 of reference cell types. Here, the Dutertre DC2 subsets aligned closely with atlas DC2 cells, while  
115 the spread of Villani clusters was much greater, and clearly aligning to respective DC and  
116 monocyte groups on the atlas. Annotation with a Cappybara similarity estimate (Figure 2E)  
117 predicted that in addition to the 2 distinct plasmacytoid DC (pDC) subsets in the Villani data, three  
118 distinct DC2 (CD1c+) subsets were present, including an intermediate DC2 subset that sat  
119 between the classical monocyte and DC2 areas (Figure 2E, 2F and Figure S2). Given the number  
120 of additional DC1 and DC2 subsets observed on the myeloid atlas, we predict that further  
121 functional characterization of activated DC phenotypes is warranted.

122

## 123 **Monocytes rapidly adapt to culture**

124 Monocytes are post-mitotic blood cells derived from bone marrow progenitors that are short lived  
125 in circulation and can repopulate macrophages in some tissue niches. The largest population of  
126 circulating monocytes is marked by high levels of expression of the LPS co-receptor CD14, which  
127 is typically used to isolate monocytes from blood. Intermediate and nonclassical subsets are  
128 marked by acquisition of the type III FcR $\gamma$ , CD16 (Schmidl et al., 2014) and are included in the  
129 atlas. Cultured monocytes have been previously described as 'activated', but while we observe a  
130 distinct culture phenotype (Figure 3), the transcriptome of cultured cells mimics many of the  
131 features of a monocyte after extravasation into tissue. Figure 3B shows the grouping of peripheral  
132 blood monocytes, in a distinct cluster to monocytes that have been exposed to tissue culture



Rajab et al.

133 plastic and culture media. This culture phenotype is typified here by a decrease in endothelial-  
134 adhesion proteins including the selectin *SELL* (Figure 3D). Regulators of RAS/RAF signaling  
135 including *SPRED2* (Wakioka et al., 2001) have an elevated expression in cultured monocytes  
136 (Figure 3E), consistent with spreading and migration across tissue culture plastics. The classical  
137 MDM requires *in vitro* differentiation of monocytes using several days exposure to growth factors  
138 such as macrophage-colony stimulating factor (M-CSF; CSF-1) or granulocyte-macrophage  
139 colony-stimulating factor (GM-CSF). These group distinctly from the cultured monocyte cluster,  
140 spreading further upwards along the culture axis (Figure 3F).

141  
142 The culture phenotype acquired by monocytes appears to be a prelude to activation, which can  
143 be observed along an adjacent axis in Figure 3F and is exemplified by the expression of *IL6*.  
144 Pathogen-activated phenotypes of cultured monocytes are typified by high expression of this and  
145 other cytokines. We observe that cultured monocytes express higher levels of chemokines, such  
146 as *CCL2*, than peripheral monocytes (Figure 3G). Furthermore, we find that culture induces the  
147 expression of *SLAMF1* (Table S3), which has shown to be necessary for TLR4 activation in  
148 human macrophages (Yurchenko et al., 2018). Moreover, this culture-phenotype is further  
149 exemplified by higher levels of *ITGB8* than circulating monocytes (Table S3), which is necessary  
150 for activating latent TGF- $\beta$  (Kelly et al., 2018)

151  
152 **Pluripotent stem cell-derived macrophages do not recapitulate hematopoietic ontogenies.**  
153 Many PSC-derived systems recapitulate fetal, rather than adult phenotypes, so it is no surprise  
154 that others have argued that PSC-derivation protocols mimic primitive rather than definitive  
155 myeloid biology. This is largely based on *MYB* expression, which is associated with definitive  
156 hematopoiesis and has high expression in hematopoietic progenitor cells isolated from bone  
157 marrow. It is clear that *MYB* is not required for PSC-derived myelopoiesis as macrophages can  
158 be grown from *MYB* knock-out embryonic stem cells (Buchrieser et al., 2017). Nevertheless, *MYB*  
159 is highly and ubiquitously expressed in PSC-myeloid progenitors, including common myeloid  
160 progenitors and hemogenic endothelium differentiated from pluripotent stem cell, and indeed,  
161 *MYB* is retained at high levels in some PSC-derived microglia (Figure 4A).

162  
163 PSC-macrophage studies that were overlaid onto the atlas grouped broadly with cultured  
164 monocytes and tissue-resident macrophages. Despite arguments on recapitulation of fetal origin,  
165 PSC-macrophages, including PSC-microglia and PSC-Kupffer cells, form an extended group  
166 associated with high expression of the human homologue of the *F4/80* antigen, *ADGRE1*, as well  
167 as high expression of lipid-scavenging receptors such as *SCARB1* (Table S4). *MAF* expression  
168 is indistinguishable in macrophages of different origin (Figure 4B). However, *LIN28B* is highly  
169 expressed in *in vitro*-derived macrophages compared to *in vivo* and *ex vivo* cells (Figure 4C),  
170 which may point to incomplete silencing of the Let7 microRNA pathway and maintenance of a  
171 fetal state (Grant Rowe et al., 2016; Zhou et al., 2017), but which is also characteristic of myeloid  
172 leukemias.

173  
174 When pluripotent stem cells are projected onto the atlas, we can see a differentiation trajectory  
175 that is orthogonal to the hematopoietic multipotent progenitor trajectory (Figure 4D). The  
176 differentiation trajectory from pluripotent stem cell to macrophage aligns more closely with an

Rajab et al.

177 endothelial progenitor than the hematopoietic intermediates observed along PC1 of the atlas.  
178 Projection of primitive hematopoietic progenitors from Carnegie staged embryos at CS11 to CS23  
179 show a high degree of similarity between definitive and primitive differentiation trajectories, with  
180 a predominant erythroid overlap in early yolk sac progenitors, followed by rapid emergence of  
181 myeloid progenitors, and primitive macrophages. These do not overlap with the PSC-axis, but do  
182 clearly sit with similar late fetal microglia (20 week old, (Thion et al., 2018)) and adult bone-marrow  
183 equivalents (Watkins et al., 2009) (Figure 4E and Figure S3).

184  
185 Some other phenotypes previously attributed to ontogeny in PSC-derived cells may rather reflect  
186 a more general culture context. For example, *ADGRE1* (*F4/80*) expression has been attributed to  
187 yolk-sac derived myeloid cells in mouse (Schulz et al., 2012). While high on PSC-derived  
188 cells, *ADGRE1* is also clearly upregulated in *ex vivo* cultured macrophages. This is exemplified  
189 by primary human microglia, which have low expression of *ADGRE1* in comparison to *ex vivo*  
190 culture or PSC-derived cells (Table S4 and Table S5).

191  
192 **Pluripotent stem cell-derived macrophages share features with tissue-resident**  
193 **macrophages despite poor maturation**

194 Macrophages derived from human PSCs offer new opportunities to model *in vivo* macrophage  
195 biology. When reviewing the studies contributing to this atlas, we noted that PSC-derived  
196 macrophages are typically benchmarked against monocyte-derived macrophages (MDMs), or  
197 cultured primary cells, using a suite of phenotyping techniques. Each experiment includes a small  
198 number of samples for transcriptional profiling, with a few notable exceptions (Alasoo et al., 2018).  
199 We argue that, given the spectrum of possible resident tissue macrophage phenotypes, it would  
200 be more useful to compare PSC-derived cells against an atlas of possible macrophage  
201 phenotypes. Whilst several groups reuse publicly available tissue macrophage data, the  
202 opportunity to carry out large-scale comparisons to different primary myeloid cells has been  
203 limited by the availability of relevant data on a compatible platform.

204  
205 Primary microglia included in the atlas include both *in vivo* isolated fetal and cultured *ex vivo* fetal  
206 and adult microglia. The profiles of *in vivo* isolated fetal microglia cluster apart from the spread of  
207 *ex vivo* cultured adult and fetal microglia (Figure S1B). Projection of single cell data from human  
208 fetal yolk sac and head (Bian et al., 2020) show high concordance with the atlas fetal microglia  
209 data, suggesting that age and culture environment override an ontogeny signature (Figure 4 and  
210 Figure S3). Cultured tissue macrophages including *ex vivo* primary microglia or Kupffer cells  
211 shared a broad transcriptional signature with MDMs, and pluripotent-stem cell derived myeloid  
212 cells. Microglia represent just over a third of PSC-directed myeloid differentiation studies in the  
213 atlas. These do not resolve into a unique cluster but share transcriptional phenotypes with PSC-  
214 derived and tissue-resident macrophages

215  
216 There are exceptions which include some 'cytokine-matured' PSC-derived microglia samples  
217 from (Abud et al., 2017). These are close to the *in vivo* fetal microglia samples of the PSC-  
218 microglia but are also closely associated with other primary tissue resident macrophages from  
219 lung, joint and gut. The atlas does provide an opportunity to review the expression of markers  
220 thought to distinguish microglia from other primary macrophages. *TMEM119*, for example, is

Rajab et al.

221 largely restricted to primary or PSC-derived microglia, although some PSC-microglia samples  
222 have low expression of this marker (Figure S1B). *P2RY12* is variably expressed across all  
223 microglial samples, but its expression is also evident in different tissue-resident samples including  
224 those derived from gut and synovial tissues (Figure S1C and Table S4 and Table S5).

225  
226 The majority of PSC-derived macrophages have low expression of HLA relevant genes including  
227 *CIITA*, a known master regulator of MHCII gene expression, which suggests poor maturation and  
228 limited capacity to present antigen to lymphocytes. Nevertheless, some *in vitro*-derived  
229 macrophages cultured with stimulating factors (Figure S1D) do show inducible *CIITA* expression,  
230 demonstrating that they have the capacity to express antigen-presenting machinery. It is also  
231 worth noting additional culture conditions that result in high *CIITA* expression without interferon-  
232 stimulation (Figure S1D). This may be the result of long-term culture conditions for microglia  
233 samples (Abud et al., 2017), or reflect prior conditioning of myeloid progenitors (Honda-Ozaki et  
234 al., 2018).

235

### 236 **Pluripotent stem cell-derived macrophages display transcriptional hallmarks of** 237 **efferocytosis**

238 Efferocytosis, or apoptotic cell clearance, has broad immunomodulatory effects (Reviewed by  
239 (Elliott et al., 2017)) and active engulfment and clearance of cells by PSC-macrophages is clearly  
240 observed in the absence of any inflammatory activation (Supplementary Video). Efferocytosis  
241 (Figure 5A) modulates macrophages from a pro-inflammatory phenotype to one with resolving  
242 qualities (Yamaguchi et al., 2014), consistent with the patterns of gene expression observed in  
243 cultured macrophages. A study (Cao et al., 2019) demonstrated higher lipid uptake in PSC-  
244 macrophages compared to peripheral blood MDMs, concordant with higher expression of  
245 efferocytosis-related genes including *S1PR1* and *MERTK*. We confirm that *MERTK* is generally  
246 highly expressed in PSC-derived macrophages, but that there is also a tissue-resident distribution  
247 of *MERTK* expression, with very low levels observed in primary alveolar macrophages, and  
248 highest levels observed in human fetal microglia (Figure 5B). Tissue-resident macrophages are  
249 known first-responders to tissue damage and are key in orchestrating inflammation and its  
250 subsequent resolution. This appears to be a phenotype that is selected for in cultured  
251 macrophages and may be an inevitable consequence of derivation that strives for high cell yield.

252  
253 Lipid homeostasis is an important role for resident tissue macrophages. A high proportion of  
254 genes differentially expressed between *in vitro*-derived macrophages/microglia/kupffer cells and  
255 tissue resident cells are involved in lipid transport, catabolism and in buffering the cells from  
256 concomitant stresses associated with lipid turn-over. For example, reduced expression of  
257 *ABCA6* is consistent with high efflux of cholesterol from these macrophages (Figure 5C). Higher  
258 levels of mitochondrial acyl-CoA dehydrogenase *ACADM* (Figure 5D) and phosphatidate  
259 phosphatase *LPIN3* (Figure 5E) suggests high lipid turnover.

260  
261 There has been growing interest in the importance of metabolic reprogramming in macrophage  
262 responses, so we asked whether media supplementation could explain the spread of PSC-derived  
263 macrophages on the atlas. All PSC-derivation protocols supplement media with fatty- or amino-  
264 acids, including L-Glutamine, non-essential amino acids (NEAA), Linoleic and Linolenic acids.

Rajab et al.

265 Some methods add fetal bovine or calf serum, but there was no obvious correlation between  
266 serum addition and without. Overall, factors are so ubiquitously used that a particular supplement  
267 alone could not explain the differences between PSC and cultured primary macrophages.

268

### 269 **Pluripotent stem cell-derived macrophages express high levels of collagen**

270 Collagen production and deposition alongside extracellular matrix remodeling are processes  
271 involved in wound healing and scarring. Macrophages are instrumental in instructing tissue repair,  
272 particularly through the production of growth factors such as TGF- $\beta$ , IGF1 and PDGF (Shook et  
273 al., 2018). Secreted growth factors drive fibroblasts and endothelial cells to produce extracellular  
274 matrix components, promoting keloid formation as well as angiogenesis. This model has  
275 macrophages influencing collagen deposition by neighboring stromal cells, however, in some  
276 instances are capable of contributing to collagen deposition as demonstrated in mouse and  
277 zebrafish injury models (Simões et al., 2020). Gene-set enrichment analysis of the genes that are  
278 most correlated with *in vitro*-derived macrophages moving away (Figure 6A) from the tissue  
279 resident populations revealed that the most significant pathways in these cells involved collagen  
280 synthesis and production (Table S6). A STRING protein-protein interaction network (Figure 6B)  
281 shows that this phenotype is significantly enriched for highly connected matrix remodeling,  
282 collagen deposition and cadherin-mediated cell-cell and cell-matrix interactions.

283

284 Perhaps pluripotent stem cell-derived cells are being driven to adopt a pro-fibrotic phenotype  
285 through the derivation or culture contents. Initial observations on analysis of myeloid-, pluripotent  
286 stem cell- and hematopoietic progenitor-derived cells, highlight higher expression of collagen  
287 genes in pluripotent stem cell-derived cells (Figure 6C). To investigate whether this phenotype is  
288 due to culture impact, we isolated peripheral blood monocytes and derived human PSC-  
289 progenitors and cultured these cells with the same culture media in the presence of M-CSF for 5  
290 days to drive macrophage differentiation. On day 5, cells were either stimulated with LPS for 2  
291 hours before extraction or extracted as control samples for sequencing analysis. Analysis of  
292 sequencing samples showed the same enriched collagen and cadherin networks with high  
293 expression of these genes observed in PSC-macrophages, with little or no expression in  
294 monocyte-derived macrophages regardless of whether cells were stimulated or not (Figure 6D).  
295 To determine this at a protein level, we carried out intracellular flow cytometry analysis of type I  
296 collagen in PSC- and monocyte-derived cells (Figure 6E). Compared with staining controls, we  
297 observed higher levels of type I collagen in PSC-macrophages. Collectively, our results suggest  
298 that although culture media can impact cell phenotype, it is not the main driver for this pro-fibrotic  
299 phenotype in PSC-macrophages in the final stages of differentiation.

300

### 301 **Discussion**

302 Human macrophage biology is integral to the development of homeostasis and disease  
303 mechanisms in every tissue in the body, but our understanding of human myeloid biology is limited  
304 by the quality by the models available to us. Here we describe an integrated myeloid transcriptome  
305 atlas as a novel resource to identify myeloid cells in single cell datasets and to benchmark *in vitro*  
306 models of *in vivo* biology. Implementation in Stemformatics enables users to upload their own  
307 data to benchmark cell types against the atlas for rapid and intuitive cell-classification. The



Rajab et al.

308 resource is scalable and will grow as the availability of new tissue resident samples and myeloid  
309 models become available.

310  
311 Transcriptional benchmarking of myeloid subsets, and particularly those benchmarking new  
312 derivation methods, typically draw on a small number of reference samples. Standard analysis  
313 workflows include normalisation methods that remove technical batch effects, and harmonise the  
314 behaviour of samples assigned to the same class. When combining data that confounds technical  
315 batch with the biology of interest, this process inevitably overstates similarities within groups and  
316 over emphasises differences between groups. The result is a somewhat self-fulfilling analysis, with  
317 the outcome predicted by the data processing approach. Here, we offer an alternative for  
318 benchmarking new models of myeloid biology against a reference atlas constructed from a large  
319 number of well phenotyped and curated published data. We demonstrate reproducible  
320 classification of major myeloid cell classes, including the influence of culture or derivation method  
321 on the phenotype of those cells. Projection of external data into the atlas further demonstrates  
322 that these phenotypic patterns are reproducible, even at the resolution of the single cell.

323  
324 Our analyses highlight that there is room for improvement in the development of *in vitro* model  
325 systems that attempt to mimic *in vivo* counterparts. We demonstrate that cord blood-derived  
326 dendritic cells differentiated ex vivo from monocytes or CD34 progenitors don't adequately  
327 capture key aspects of *in vivo* myeloid biology. Likewise, by benchmarking curated public data of  
328 PSC-macrophages and their precursor cells against the atlas, it is apparent that these represent  
329 neither definitive nor primitive myelopoiesis, or rather, that they imperfectly recapitulate aspects  
330 of both. PSC-conditions clearly do not mimic the developmental time-frame nor tissue niche of  
331 yolk-sac, fetal liver or bone marrow. PSC-macrophages do recapitulate many aspects of ex-vivo  
332 cultured tissue macrophages, but there is little evidence for cultured microglia being distinct from  
333 any other cultured macrophage. In our hands, PSC-macrophages display transcriptional  
334 hallmarks of efferocytosis and surprisingly collagen production, which may suggest that the  
335 derivation process of these cells are driving a pro-fibrotic phenotype. These observations offer  
336 new opportunities to co-opt additional transcriptional networks that may arise from the tissue  
337 niche, to improve stem cell derived myeloid models.

### 338 339 **Acknowledgements**

340 The authors thank Tyrone Chen and Othmar Korn for assistance with data processing and Isha  
341 Nagpal for website development to support the Stemformatics interactive viewer. The authors  
342 thank Ramaciotti Centre for Genomics (University of New South Wales; Sydney) and University  
343 of Glasgow Polyomics facility for mRNA sequencing, and the Melbourne Cytometry Platform for  
344 flow cytometry assistance. This work was funded by Stem Cells Australia, an Australian  
345 Research Council Special Research Initiative [SRI110001002] to CAW; NHMRC Synergy  
346 [APP1186371] to CAW; Wellcome Trust catalyst funding WELLCOME (097821/Z/11/B) to CAW,  
347 SM, MKS; SM work was supported by the Research into Inflammatory Arthritis Centre Versus  
348 Arthritis (RACE) [#20298]; MKS is funded by Versus Arthritis UK [#20298 & #22072]. NR is  
349 funded by the Centre for Stem Cell Systems and the CSIRO Synthetic Biology Future Science  
350 Platform. CAW is funded by a Future Fellowship from the Australian Research Council  
351 [FT150100330]. JC is funded by the JEM Research Foundation to the Stem Cell Atlas.



Rajab et al.

352

353 **Author Contributions**

354 Conception NR, JC, CAW; Experimental Investigation and Interpretation NR, VJ, JG, CAW;  
355 Experimental Resources ALL, CAW; Methodology PWA, JC, YD; Data provider NR, MKS, SM;  
356 Curation NR, MR, CMP, CAW; Statistical analysis YD, KALC, PWA; Writing – original draft NR,  
357 CAW; Writing - review and editing NR, PWA, SM, ALL, KALC, JC, CAW; Supervision CAW,  
358 ALL, KAC; Project Funding - CAW.

359

360 **Declaration of Interests**

361 None

362

363 **References**

- 364 Abud, E.M., Ramirez, R.N., Martinez, E.S., Healy, L.M., Nguyen, C.H.H., Newman, S.A.,  
365 Yeromin, A. V., Scarfone, V.M., Marsh, S.E., Fimbres, C., et al. (2017). iPSC-Derived Human  
366 Microglia-like Cells to Study Neurological Diseases. *Neuron* *94*, 278-293.e9.
- 367 Alasoo, K., Rodrigues, J., Mukhopadhyay, S., Knights, A.J., Mann, A.L., Kundu, K., Hale, C.,  
368 Dougan, G., and Gaffney, D.J. (2018). Shared genetic effects on chromatin and gene  
369 expression indicate a role for enhancer priming in immune response. *Nat. Genet.* *50*, 424–431.
- 370 Angel, P.W., Rajab, N., Deng, Y., Pacheco, C.M., Chen, T., Le Cao, K.-A., Choi, J., and Wells,  
371 C. (2020). A simple, scalable approach to building a cross-platform transcriptome atlas. *BioRxiv*  
372 2020.03.09.984468.
- 373 Bagger, F.O., Sasivarevic, D., Sohi, S.H., Laursen, L.G., Punthir, S., Sønderby, C.K., Winther,  
374 O., Rapin, N., and Porse, B.T. (2016). BloodSpot: A database of gene expression profiles and  
375 transcriptional programs for healthy and malignant haematopoiesis. *Nucleic Acids Res.* *44*,  
376 D917–D924.
- 377 Buchrieser, J., James, W., and Moore, M.D. (2017). Human Induced Pluripotent Stem Cell-  
378 Derived Macrophages Share Ontogeny with MYB-Independent Tissue-Resident Macrophages.  
379 *Stem Cell Reports* *8*, 334–345.
- 380 Cao, X., Yakala, G.K., van den Hil, F.E., Cochrane, A., Mummery, C.L., and Orlova, V. V.  
381 (2019). Differentiation and Functional Comparison of Monocytes and Macrophages from hiPSCs  
382 with Peripheral Blood Derivatives. *Stem Cell Reports* *12*, 1282–1297.
- 383 Choi, J., Pacheco, C.M., Mosbergen, R., Korn, O., Chen, T., Nagpal, I., Englart, S., Angel, P.W.,  
384 and Wells, C.A. (2019a). Stemformatics: visualize and download curated stem cell data. *Nucleic*  
385 *Acids Res.* *47*, D841–D846.
- 386 Choi, J., Baldwin, T.M., Wong, M., Bolden, J.E., Fairfax, K.A., Lucas, E.C., Cole, R., Biben, C.,  
387 Morgan, C., Ramsay, K.A., et al. (2019b). Haemopedia RNA-seq: a database of gene  
388 expression during haematopoiesis in mice and humans. *Nucleic Acids Res.* *47*, D780–D785.
- 389 Dutertre, C.A., Becht, E., Irac, S.E., Khalilnezhad, A., Narang, V., Khalilnezhad, S., Ng, P.Y.,  
390 van den Hoogen, L.L., Leong, J.Y., Lee, B., et al. (2019). Single-Cell Analysis of Human  
391 Mononuclear Phagocytes Reveals Subset-Defining Markers and Identifies Circulating  
392 Inflammatory Dendritic Cells. *Immunity* *51*, 573-589.e8.
- 393 Elliott, M.R., Koster, K.M., and Murphy, P.S. (2017). Efferocytosis Signaling in the Regulation of  
394 Macrophage Inflammatory Responses. *J. Immunol.* *198*, 1387–1394.
- 395 Fabregat, A., Jupe, S., Matthews, L., Sidiropoulos, K., Gillespie, M., Garapati, P., Haw, R.,

Rajab et al.

- 396 Jassal, B., Korninger, F., May, B., et al. (2018). The Reactome Pathway Knowledgebase.  
397 *Nucleic Acids Res.* *46*, D649–D655.
- 398 Gautier, E.L., Shay, T., Miller, J., Greter, M., Jakubzick, C., Ivanov, S., Helft, J., Chow, A.,  
399 Elpek, K.G., Gordonov, S., et al. (2012). Gene-expression profiles and transcriptional regulatory  
400 pathways that underlie the identity and diversity of mouse tissue macrophages. *Nat. Immunol.*  
401 *13*, 1118–1128.
- 402 Gosselin, D., Skola, D., Coufal, N.G., Holtman, I.R., Schlachetzki, J.C.M., Sajti, E., Jaeger, B.N.,  
403 O'Connor, C., Fitzpatrick, C., Pasillas, M.P., et al. (2017). An environment-dependent  
404 transcriptional network specifies human microglia identity. *Science* (80- ). *356*, 1248–1259.
- 405 Grant Rowe, R., Wang, L.D., Coma, S., Han, A., Mathieu, R., Pearson, D.S., Ross, S., Sousa,  
406 P., Nguyen, P.T., Rodriguez, A., et al. (2016). Developmental regulation of myeloerythroid  
407 progenitor function by the Lin28b-let-7-Hmga2 axis. *J. Exp. Med.* *213*, 1497–1512.
- 408 Hay, S.B., Ferchen, K., Chetal, K., Grimes, H.L., and Salomonis, N. (2018). The Human Cell  
409 Atlas bone marrow single-cell interactive web portal. *Exp. Hematol.* *68*, 51–61.
- 410 Honda-Ozaki, F., Terashima, M., Niwa, A., Saiki, N., Kawasaki, Y., Ito, H., Hotta, A., Nagahashi,  
411 A., Igura, K., Asaka, I., et al. (2018). Pluripotent Stem Cell Model of Nakajo-Nishimura  
412 Syndrome Untangles Proinflammatory Pathways Mediated by Oxidative Stress. *Stem Cell*  
413 *Reports* *10*, 1835–1850.
- 414 Huang, E., and Wells, C.A. (2014). Environmental Influences Interface of Genetic, Epigenetic,  
415 and Responsiveness Is Determined at the The Ground State of Innate Immune Downloaded  
416 from. *J Immunol J. Immunol. J. Immunol.* *193*, 13–19.
- 417 Jones, J.C., Sabatini, K., Liao, X., Tran, H.T., Lynch, C.L., Morey, R.E., Glenn-Pratola, V.,  
418 Boscolo, F.S., Yang, Q., Parast, M.M., et al. (2013). Melanocytes derived from transgene-free  
419 human induced pluripotent stem cells. *J. Invest. Dermatol.* *133*, 2104–2108.
- 420 Joshi, K., Elso, C., Motazedian, A., Labonne, T., Schiesser, J. V., Cameron, F., Mannering, S.I.,  
421 Elefanty, A.G., and Stanley, E.G. (2019). Induced pluripotent stem cell macrophages present  
422 antigen to proinsulin-specific T cell receptors from donor-matched islet-infiltrating T cells in type  
423 1 diabetes. *Diabetologia* *62*, 2245–2251.
- 424 Kelly, A., Gunaltay, S., McEntee, C.P., Shuttleworth, E.E., Smedley, C., Houston, S.A., Fenton,  
425 T.M., Levison, S., Mann, E.R., and Travis, M.A. (2018). Human monocytes and macrophages  
426 regulate immune tolerance via integrin  $\alpha\beta 8$ -mediated TGF $\beta$  activation. *J. Exp. Med.* *215*,  
427 2725–2736.
- 428 Kong, W., Fu, Y.C., and Morris, S.A. (2020). Capybara: A computational tool to measure cell  
429 identity and fate transitions. *BioRxiv* 2020.02.17.947390.
- 430 Lee, C.Z.W., Kozaki, T., and Ginhoux, F. (2018). Studying tissue macrophages in vitro: are  
431 iPSC-derived cells the answer? *Nat. Rev. Immunol.* *18*, 716–725.
- 432 Ng, E.S., Davis, R., Stanley, E.G., and Elefanty, A.G. (2008). A protocol describing the use of a  
433 recombinant protein-based, animal product-free medium (APEL) for human embryonic stem cell  
434 differentiation as spin embryoid bodies. *Nat. Protoc.* *3*, 768–776.
- 435 Rajab, N., Rutar, M., Laslett, A.L., and Wells, C.A. (2018). Designer macrophages: Pitfalls and  
436 opportunities for modelling macrophage phenotypes from pluripotent stem cells. *Differentiation*  
437 *104*, 42–49.
- 438 Regev, A., Teichmann, S.A., Lander, E.S., Amit, I., Benoist, C., Birney, E., Bodenmiller, B.,  
439 Campbell, P., Carninci, P., Clatworthy, M., et al. (2017). The Human Cell Atlas. *Elife* *6*.

Rajab et al.

- 440 Schmidl, C., Renner, K., Peter, K., Eder, R., Lassmann, T., Balwierz, P.J., Itoh, M., Nagao-Sato,  
441 S., Kawaji, H., Carninci, P., et al. (2014). Transcription and enhancer profiling in human  
442 monocyte subsets. *Blood* 123, e90–e99.
- 443 Schroder, K., Irvine, K.M., Taylor, M.S., Bokil, N.J., Le Cao, K.-A., Masterman, K.-A., Labzin,  
444 L.I., Semple, C.A., Kapetanovic, R., Fairbairn, L., et al. (2012). Conservation and divergence in  
445 Toll-like receptor 4-regulated gene expression in primary human versus mouse macrophages.  
446 *Proc. Natl. Acad. Sci. U. S. A.* 109, E944-53.
- 447 Shook, B.A., Wasko, R.R., Rivera-Gonzalez, G.C., Salazar-Gatzimas, E., López-Giráldez, F.,  
448 Dash, B.C., Muñoz-Rojas, A.R., Aultman, K.D., Zwick, R.K., Lei, V., et al. (2018). Myofibroblast  
449 proliferation and heterogeneity are supported by macrophages during skin repair. *Science* (80-  
450 ). 362, eaar2971.
- 451 Simões, F.C., Cahill, T.J., Kenyon, A., Gavriouchkina, D., Vieira, J.M., Sun, X., Pezzolla, D.,  
452 Ravaud, C., Masmanian, E., Weinberger, M., et al. (2020). Macrophages directly contribute  
453 collagen to scar formation during zebrafish heart regeneration and mouse heart repair. *Nat.*  
454 *Commun.* 11, 1–17.
- 455 Szklarczyk, D., Gable, A.L., Lyon, D., Junge, A., Wyder, S., Huerta-Cepas, J., Simonovic, M.,  
456 Doncheva, N.T., Morris, J.H., Bork, P., et al. (2019). STRING v11: protein–protein association  
457 networks with increased coverage, supporting functional discovery in genome-wide  
458 experimental datasets. *Nucleic Acids Res.* 47, D607–D613.
- 459 Turlach, B.A., and Weingessel, A. (2019). quadprog: Functions to Solve Quadratic  
460 Programming Problems. R package version 1.5-8.
- 461 Vijayan, D., Radford, K.J., Beckhouse, A.G., Ashman, R.B., and Wells, C.A. (2012). Mincle  
462 polarizes human monocyte and neutrophil responses to *Candida albicans*. *Immunol. Cell Biol.*  
463 90, 889–895.
- 464 Vijayan, V., Pradhan, P., Braud, L., Fuchs, H.R., Gueler, F., Motterlini, R., Foresti, R., and  
465 Immenschuh, S. (2019). Human and murine macrophages exhibit differential metabolic  
466 responses to lipopolysaccharide - A divergent role for glycolysis. *Redox Biol.* 22, 101147.
- 467 Villani, A.C., Satija, R., Reynolds, G., Sarkizova, S., Shekhar, K., Fletcher, J., Griesbeck, M.,  
468 Butler, A., Zheng, S., Lazo, S., et al. (2017). Single-cell RNA-seq reveals new types of human  
469 blood dendritic cells, monocytes, and progenitors. *Science* (80- ). 356.
- 470 Virtanen, P., Gommers, R., Oliphant, T.E., Haberland, M., Reddy, T., Cournapeau, D., Burovski,  
471 E., Peterson, P., Weckesser, W., Bright, J., et al. (2019). SciPy 1.0--Fundamental Algorithms for  
472 Scientific Computing in Python. *Nat. Methods* 17, 261–272.
- 473 Vlahos, K., Sourris, K., Mayberry, R., McDonald, P., Bruveris, F.F., Schiesser, J. V., Bozaoglu,  
474 K., Lockhart, P.J., Stanley, E.G., and Elefanty, A.G. (2019). Generation of iPSC lines from  
475 peripheral blood mononuclear cells from 5 healthy adults. *Stem Cell Res.* 34, 101380.
- 476 Wakioka, T., Sasaki, A., Kato, R., Shouda, T., Matsumoto, A., Miyoshi, K., Tsuneoka, M.,  
477 Komiya, S., Baron, R., and Yoshimura, A. (2001). Spred is a Sprouty-related suppressor of Ras  
478 signalling. *Nature* 412, 647–651.
- 479 Watkins, N.A., Gusnanto, A., de Bono, B., De, S., Miranda-Saavedra, D., Hardie, D.L.,  
480 Angenent, W.G.J., Attwood, A.P., Ellis, P.D., Erber, W., et al. (2009). A HaemAtlas:  
481 characterizing gene expression in differentiated human blood cells. *Blood* 113, e1-9.
- 482 Yamaguchi, H., Maruyama, T., Urade, Y., and Nagata, S. (2014). Immunosuppression via  
483 adenosine receptor activation by adenosine monophosphate released from apoptotic cells. *Elife*  
484 3.

Rajab *et al.*

485 Yurchenko, M., Skjesol, A., Ryan, L., Richard, G.M., Kandasamy, R.K., Wang, N., Terhorst, C.,  
486 Husebye, H., and Espevik, T. (2018). SLAMF1 is required for TLR4-mediated TRAM-TRIF-  
487 dependent signaling in human macrophages. *J. Cell Biol.* 217, 1411–1429.

488 Zhou, J., Chan, Z.L., Bi, C., Lu, X., Chong, P.S.Y., Chooi, J.Y., Cheong, L.L., Liu, S.C., Ching,  
489 Y.Q., Zhou, Y., et al. (2017). LIN28B activation by PRL-3 promotes leukemogenesis and a stem  
490 cell-like transcriptional program in AML. *Mol. Cancer Res.* 15, 294–303.

491

## 492 **Figure Titles and Legends**

493

### 494 **Figure 1: A reference atlas for human myeloid biology**

495 (A) Stemformatics myeloid atlas with samples coloured by cell type. Navy blue - monocytes,  
496 blue - macrophages, aqua -Dendritic cells, dark green - CD141+ DC, light green - CD1c+ DC,  
497 yellow - pDC, brown – granulocytes, pink stem and progenitor cells, hemogenic endothelium.  
498 Validation with Haemopedia RNAseq myeloid samples: diamond shape – monocytes, circle  
499 granulocytes, cross DC. (B) Atlas coloured by ranked expression of TMEM1. (Scale bar: high  
500 ranked expression (dark red) to low ranked expression (grey) indicating axis of activation) (C)  
501 Atlas coloured by culture status (sample source). See also Table 1, Figure S1, and Table S1.

502

### 503 **Figure 2: Cultured and *in vitro*-derived dendritic cells do not capture aspects *in vivo*** 504 **myeloid biology**

505 (A) DC subsets displayed in the atlas – aqua *in vitro* (cord blood derived) DC, dark green DC1  
506 (CD141+), light green DC2 (CD1c+), yellow - pDC, brown neutrophils (B) atlas coloured by ranked  
507 expression of TLR7. (Scale bar: high ranked expression (dark red) to low ranked expression  
508 (grey)). (C) Ranked expression (Y-axis) of receptor CX3CR1 and cell-fusion protein DC-STAMP  
509 *in vivo* dendritic cells (n=145), *ex vivo* dendritic cells (n=17) and *in vitro*-derived dendritic cells  
510 (n=57). Grey stripe indicates variance attributable to platform. P-value: Mann-Whitney-Wilcoxon  
511 rank sum test. (D) Single cell projections of Villani *et al.* (2017) and Dutertre *et al.* (2019) samples  
512 onto atlas (F) Heatmap derived from Capybara analysis of Villani *et al.* (2017) and Dutertre *et al.*  
513 (2019) samples compared to myeloid cell types. Colour gradients reflect similarity of single cell  
514 clusters to atlas cell types (dark least similar, to light most similar). See also Figure S2 and Table  
515 S2.

516

### 517 **Figure 3: Monocytes acquire a culture phenotype**

518 (A) Schematic of rolling monocytes, highlighting cultured cells mimic many of the features of a  
519 monocyte after extravasation (B) Cultured monocytes form a distinct cluster away from *in vivo*  
520 monocytes along PC3 (C) STRING-DB network of top-ranked genes differentially expressed  
521 between peripheral blood (*in vivo*, n=107) and cultured monocytes (*ex vivo*, n=171) indicating  
522 upregulation of cytoskeletal proteins and down regulation of endothelial-adhesion proteins (D)  
523 Ranked expression (Y-axis) of gene involved in endothelial adhesion, SELL, comparing cultured  
524 monocytes (n=171) with monocytes directly profiled from blood (*in vivo*, n=107). Grey stripe  
525 indicates variance attributable to platform. P-value: Mann-Whitney-Wilcoxon rank sum test  
526 (E)Ranked expression (Y-axis) of gene involved in the regulation of RAS/RAF signaling  
527 comparing cultured monocytes (n=171) with monocytes directly profiled from blood (*in vivo*,  
528 n=107). Grey stripe indicates variance attributable to platform. P-value: Mann-Whitney-Wilcoxon



Rajab et al.

529 rank sum test (F) atlas coloured by ranked expression of IL-6 (Scale bar: high ranked  
530 expression (dark red) to low ranked expression (grey) indicating axis of activation) (G) Ranked  
531 expression (Y-axis) of Chemokine CCL2 comparing cultured monocytes (n=171) with  
532 monocytes directly profiled from blood (*in vivo*, n=107). Grey stripe indicates variance  
533 attributable to platform. P-value: Mann-Whitney-Wilcoxon rank sum test. See also Table S3.

534

535 **Figure 4: Pluripotent stem cell-derived macrophages do not recapitulate hematopoietic**  
536 **ontogenies**

537 (A) atlas coloured by ranked expression of MYB (Scale bar: high ranked expression (dark red) to  
538 low ranked expression (grey). (B) Ranked expression (Y-axis) of MAF expression from *in vivo*  
539 (n=61), *ex vivo* (n=26) and *in vitro*- (n=96) derived macrophages (gut, synovial, kupffer, microglia,  
540 macrophage). Grey stripe indicates variance attributable to platform. (C) Ranked expression (Y-  
541 axis) of LIN28B expression from *in vivo* (n=61), *ex vivo* (n=26) and *in vitro*- (n=96) derived  
542 macrophages (gut, synovial, kupffer, microglia, macrophage). Grey stripe indicates variance  
543 attributable to platform. P-value MannWhitney-Wilcoxon rank sum test. (D) atlas with samples  
544 coloured by cell type with projection of iPSC samples highlighting their position in comparison to  
545 *in vitro*-derived macrophages, hematopoietic multipotent progenitors and hemangioblast. (E)  
546 Single cell projection of (Bian et al., 2020) human fetal yolk sac cell clusters onto the atlas  
547 following an 8 cell aggregation. See also Figure S3 and Table S4 and Table S5.

548

549 **Figure 5: Pluripotent stem cell-derived macrophages display transcriptional hallmarks of**  
550 **efferocytosis**

551 (A) Schematic of impact of efferocytosis on cell metabolic reprogramming and function (B) atlas  
552 coloured by ranked expression of MERTK (scale bar: high ranked expression (dark red) to low  
553 ranked expression (grey). (C,D,E) Ranked expression (Y-axis) of genes comparing *in vivo* (n=61),  
554 *ex vivo* (n=26) and *in vitro*-derived (n=96) macrophages (gut, synovial, kupffer, microglia,  
555 macrophage) for (C) cholesterol efflux (D) mitochondrial acyl-CoA dehydrogenase (E)  
556 phosphatidate phosphatase. See also Table S4 and Table S5.

557

558 **Figure 6: Pluripotent stem cell-derived macrophages express high levels of collagen**

559 (A) atlas coloured by cell source to highlight *in vitro*-derived macrophages used for regression  
560 testing (B) STRING\_DB Protein-Protein network of *in vitro*-derived macrophages highlights  
561 enrichment of collagen, growth factor and cadherin networks. Line color indicates the type of  
562 interaction evidence. Light blue solid lines indicate known interactions from curated databases,  
563 solid pink line indicates known interactions that have been experimentally determined, bright  
564 green lines indicate gene neighborhood predicted interactions, red lines indicate gene fusions  
565 predicted interactions, dark blue lines indicate gene co-occurrence predicted interactions,  
566 yellow/green lines indicate textmining, black lines indicate co-expression, and light purple lines  
567 indicate protein homology. (C) Violin plots of myeloid- (n=584), pluripotent stem cell- (n=116) and  
568 hematopoietic progenitor- (n=201) derived cells comparing expression of collagen genes  
569 (COL1A1 and COL4A2) (D) mRNA-seq gene expression from human peripheral blood monocyte-  
570 derived macrophages (HMDM) (n=3) and human pluripotent stem cell derived macrophages  
571 (PSCM) (n=2) samples (C= control, S = stimulated) (E) Intracellular flow cytometry analysis of  
572 human peripheral blood monocyte-derived macrophages (HMDM) and human pluripotent stem



Rajab et al.

573 cell derived macrophages (PSCM), representative of 2 experimental repeats (n=2 HMDM, n=2  
574 PSCM). Red = no primary antibody control, Black = isotype control, Purple = Type I Collagen  
575 stain. See also Table S6.

576

577 **Supplemental Figures**

578

579 **Figure S1: A reference atlas and resource for human myeloid biology. Related to Figure**  
580 **1.**

581 (A) Pre-gene filtering (left) and Post-gene filtering (right) atlas coloured by platform: red various  
582 microarray platforms, black RNAseq platforms. (B) atlas coloured by ranked expression of  
583 TMEM119 (Scale bar: high ranked expression (dark red) to low ranked expression (grey) (C) atlas  
584 coloured by ranked expression of P2RY12 (Scale bar: high ranked expression (dark red) to low  
585 ranked expression (grey) (D) Ranked expression (Y-axis) of Class II transactivator (CIITA) *in vivo*  
586 versus *in vitro*-derived macrophages (gut, synovial, kupffer, microglia, macrophage). Red –  
587 activated, yellow – (Abud et al., 2017) microglia samples, khaki- Honda-Ozaki et al. (2018)  
588 macrophage samples.

589

590 **Figure S2: Single cell aggregation and projection. Related to Figure 2.**

591 (A) Kolmogorov–Smirnov (KS) statistics (y-axis) to assess the difference in gene expression  
592 distribution between pseudo-bulk single cells DC6 and bulk sample plasmacytoid dendritic cells  
593 from the atlas, with respect to the number of single cells that are aggregated (x-axis). Each line  
594 indicates one of thirty random sub-samplings with replacement trial. KS statistics are calculated  
595 on each gene and averaged across all genes. A minimum KS statistic is obtained when  
596 aggregating 8 cells. (B) atlas cell types before single cell projection (C) Single cell projection of  
597 (Dutertre et al., 2019) and (Villani et al., 2017) samples onto the atlas where a 8 cells are  
598 aggregated based on (A).

599

600 **Figure S3: Fetal Ontogeny. Related to Figure 4.**

601 atlas coloured by cell type with (Bian et al., 2020) projection of single cell data from human fetal  
602 yolk sac and head.

603

604 **Tables with Titles and Legends**

605

606 **Table 1: Atlas inclusion of tissue-resident monocytes and macrophages**

| Tissue         | Tier 1 (sample #)                           | Tier 2  | Cell Type    |
|----------------|---------------------------------------------|---------|--------------|
| Blood          | <i>in vivo</i> (64)<br><i>ex vivo</i> (162) | myeloid | monocyte     |
| Cord Blood     | <i>ex vivo</i> (51)                         | myeloid | monocyte     |
| Gut            | <i>in vivo</i> (15)                         | myeloid | macrophage   |
| Synovium       | <i>in vivo</i> (18)                         | myeloid | macrophage   |
| Brain          | <i>in vivo</i> (10)<br><i>ex vivo</i> (21)  | myeloid | microglia    |
| Lung           | <i>in vivo</i> (14)                         | myeloid | macrophage   |
| Liver          | <i>ex vivo</i> (5)                          | myeloid | Kupffer cell |
| Ovarian Tumour | <i>in vivo</i> (4)                          | myeloid | macrophage   |

Rajab et al.

607

## 608 **Supplemental Tables**

609

### 610 **Table S1: Datasets and samples to compile atlas and single cell projection. Related to** 611 **Figure 1.**

612 Tissue resident macrophages and dendritic cells from peripheral blood, spleen, thymus, joint,  
613 lung, gut, brain and liver. Samples also included monocytes from peripheral and cord blood, as  
614 well as *in vitro* differentiated DCs from cord blood progenitors or monocyte-derived  
615 macrophages. Columns include dataset accession ID, platform, Stemformatics Dataset ID,  
616 number of samples, tier categorization, cell type and relevant tissue/organism part.

617

### 618 **Table S2: *in vivo* vs. *ex vivo* vs. *in vitro* dendritic cells. Related to Figure 2.**

619 Comparison of gene expression of *in vivo* (n=145), *ex vivo* (n=17) and *in vitro*- (n=57) derived  
620 dendritic cells. Columns refer to gene symbols, P-values re-calculated by Mann-  
621 WhitneyWilcoxon rank-sum test, mean and standard deviation.

622

### 623 **Table S3: *in vivo* vs. *ex vivo* monocytes. Related to Figure 3.**

624 Comparison of gene expression of *ex vivo* (n=171) and *in vivo* (n=107) monocytes. Columns  
625 refer to gene symbols, P-values re-calculated by Mann-Whitney-Wilcoxon rank-sum test, mean  
626 and standard deviation.

627

### 628 **Table S4: *in vivo* vs. *ex vivo* vs. *in vitro* macrophages. Related to Figure 4 and Figure 5.**

629 Comparison of gene expression of *in vivo* (n=61), *ex vivo* (n=26), *in vitro*- (n=96) derived  
630 macrophages (gut, synovial, kupffer, microglia, macrophage). Columns refer to gene symbols,  
631 P-values recalculated by Mann-Whitney-Wilcoxon rank-sum test, mean and standard deviation.

632

### 633 **Table S5: *in vivo* vs. *ex vivo* vs. *in vitro* microglia. Related to Figure 4 and Figure 5.**

634 Comparison of gene expression of *in vivo* (n=10), *ex vivo* (n=21) and *in vitro*- (n=43) derived  
635 microglia. Columns refer to gene symbols, P-values re-calculated by Mann-Whitney-Wilcoxon  
636 rank-sum test, mean and standard deviation.

637

### 638 **Table S6: Gene-Set Enrichment Analysis. Related to Figure 6.**

639 Table of the top 10 Reactome pathways enriched in genes highly correlated with *in vitro*-derived  
640 macrophage spread. Enrichment: number of genes in the list/number of genes in that pathway  
641 (False Discovery Rate-value). Genes: multiple entries assigned to the same gene indicated by  
642 underlining of gene symbol with UniProt accessions in brackets.

643

## 644 **Supplemental Video**

645 Active engulfment and clearance of cells by pluripotent stem cell-derived macrophages.

646

## 647 **Methods**

648 Atlas formation was developed as described in (Angel et al., 2020) and is comprised of 44  
649 datasets, 901 samples and 3757 genes. Mapping, and analysis of microarray and RNA  
650 sequencing datasets were conducted in the Stemformatics platform. Scripts are available for

*Rajab et al.*

651 download from the Stemformatics BitBucket (Choi et al., 2019a)). All datasets and relevant  
652 samples (Supplementary Table 6) passed stringent quality control checks required for hosting  
653 on the stemformatics platform. Quality control checks include evaluation of library quality, and  
654 inclusion of replicates associated with experimental design. These datasets were either already  
655 hosted on stemformatics, or were downloaded from public depositories and processed through  
656 the stemformatics pipeline for inclusion.

657

#### 658 Platform Effect Analysis and Gene Selection for PCA

659 This method assesses each gene independently for a dependence upon experimental platform.  
660 The initial step is to transform expression values from RNA Sequencing and Microarray into  
661 percentile values. The second step uses a univariate estimate of gene platform dependence  
662 and then selects genes with a small ratio of platform dependent variance to total variance.  
663 These genes are used to run the PCA (3757 genes passed this cut). The threshold for gene  
664 selection is empirically determined by using the Kruskal Wallis H Test to assess the difference  
665 in platform expression distribution for each principal component. A platform variance fraction of  
666 0.2 is found to remove the platform effect for the first three principal component. For further  
667 details, please refer to (Angel et al., 2020).

668

#### 669 Quantification and Statistical Analysis

670 P-values were re-calculated using the Mann-Whitney-Wilcoxon rank-sum test (two-sided). This  
671 was implemented via the python (version 3.7.5) SciPy package (version 1.3.1)(Virtanen et al.,  
672 2019)Multiple testing over the set of genes was accounted for with Bonferroni correction  
673 implemented in the statsmodels package (Seabold and Perktold, 2010)

674

#### 675 Pseudo-bulk samples from Villani's Single Cell Data

676 Single cells were aggregated to form pseudo-bulk samples to mitigate library size differences  
677 between single cell and bulk data, and to project samples onto the atlas. Each group of (known)  
678 cell type in the single cell data was randomly sampled for  $k$  single cells with replacement.  
679 Aggregation consisted in summing up their expression profiles.  $k$  was determined by the  
680 number of sampling (i.e. how many pseud-bulk samples for each cell type) as half of the cell  
681 type's population size. The optimum aggregation size  $k$  was investigated by evaluating the  
682 similarity in distribution between the atlas' plasmacytoid dendritic cells and the aggregated  
683 pseudo-bulk DC6 samples using Kolmogorov–Smirnov (KS) statistic  $D$  averaged across all  
684 genes. KS statistic measured the difference between the empirical cumulative distribution  
685 functions of two groups of samples; the smaller the value, the closer the aggregated DC6  
686 resembled the reference transcriptional profiles from the pDC in the bulk atlas. A minimum  $D$   
687 value was obtained for  $k = 8$  across 30 iterations (Supplementary Figure 1). Similar results were  
688 obtained for other cell types. Thus, every pseudo-bulk samples were aggregated from 8 single  
689 cells.

690

#### 691 Capybara Cell Score

692 Capybara (Kong et al., 2020)cell scores was used to measure cell identities continuum of the  
693 pseudo-bulk samples using the atlas as the reference. Capybara cell scores were calculated by  
694 performing restricted linear regression of reference samples on each of the pseudo-bulk

Rajab et al.

695 samples' expression profiles. Denote  $y_i$  the expression profile of the  $i^{th}$  pseudo-bulk sample of  
696 length  $G$ , where  $G$  represents the total number of genes in the data, and  $X$  a  $(G \times T)$  the  
697 reference matrix, where  $T$  represents the number of known cell types of interest. We considered  
698 5 cell types: Dendritic cell, Monocyte, CD141+ dendritic cell, CD1c+ dendritic cell and  
699 Plasmacytoid dendritic cells.  $X$  is obtained by averaging the expression profiles of the  
700 Stemformatics myeloid samples according to their cell types. Capybara solves the optimization  
701 problem

$$\operatorname{argmin}_{\beta} (y_i - X\beta_i)^T (y_i - X\beta_i)$$

702 under the constraint that  
703

$$\beta_{it} > 0 \quad \forall t \in \{1, 2, \dots, T\}, \quad \sum_t \beta_{it} < 1$$

704 where  $\beta_{it}$  is a regression coefficient, or cell score, for each pseudo-bulk sample  $i$  and each atlas  
705 cell type  $t$ . The cell score is obtained using quadratic programming implemented with R (version  
706 3.6.2) package *quadprog* (version 1.5-8)(Turlach and Weingessel, 2019).  
707

#### 708 Enrichment analysis and Protein-Protein Network

709 An enrichment analysis was conducted on the top 92 genes ranked by Pearson correlation  
710 ( $\geq 0.7$ ) along the upward axis including in vitro-derived cells. Enriched pathways were identified  
711 using these genes at Reactome (Fabregat et al., 2018) and significance ranked by p-value/false  
712 discovery rate. A protein-protein network was generated using the top 92 genes on STRING-DB  
713 (Szklarczyk et al., 2019). Disconnected nodes not shown.  
714

#### 715 Pluripotent Stem Cell Differentiation

716 Stem cell work was carried out in accordance with The University of Melbourne ethics  
717 committee HREC (approval 1851831). Stem cell lines used were PB001.1 (Vlahos et al., 2019),  
718 a kind gift from the Stem Cell Core Facility at the Murdoch Children's Research Institute, and  
719 HDF51((Jones et al., 2013); RRID:CVCL\_UF42) was kindly provided to ALL by Prof. Jeanne  
720 Loring (The Scripps Research Institute, CA, USA). Human pluripotent stem cells were  
721 differentiated into macrophages based on protocol described by ((Joshi et al., 2019; Ng et al.,  
722 2008)), with modifications. Modifications were as follows: embryoid bodies were kept in  
723 rotational cultures without transference to matrigel plates for adherence, and the collection of  
724 progenitors from week 2 were immediately re-suspended in RPMI-1640 containing L-  
725 Glutamine (Life Technologies) and 10% Fetal Bovine Serum for macrophage differentiation (see  
726 macrophage differentiation).  
727

#### 728 Monocyte isolation from peripheral blood

729 Buffy Coat was obtained from the Australian Red Cross Blood Service in accordance with The  
730 University of Melbourne ethics committee HREC (approval 1646608). The blood was diluted with  
731 PBS at a 1:3 dilution and underlayered with Ficoll-Hypaque. The underlayered blood samples were  
732 centrifuged at 350g for 30 minutes at 24°C with no brake. Peripheral blood mononuclear cells  
733 were isolated from the interphase and washed twice by using MACs buffer (DPBS, 0.5% heat  
734 inactivated Fetal Bovine Serum, 2mM EDTA) and centrifuging at 400g for 5 minutes at 4°C. Cells  
735 were centrifuged at 400g for 5 minutes at 4°C and resuspended in 40µl MACs buffer per 107 cells.  
736 Monocytes were positively selected by a magnetic field using Human  
737 CD14 MicroBeads (MACS Miltenyi Biotec) and LS Columns (Miltenybiotec). These cells were  
738 plated for macrophage differentiation (see Macrophage differentiation  
739

Rajab et al.

740

741 Macrophage differentiation

742 Monocytes/progenitor cells were cultured in tissue-culture treated 6 well plates. Cells were  
743 cultured in RPMI-1640 medium containing L-Glutamine (Life Technologies) with 10% Fetal  
744 Bovine Serum and 100ng/ml recombinant Human M-CSF (R&D Systems; 216-MC) for 5 days.  
745 Media changes were carried out on day 4.

746

747 Flow Cytometry

748 HMDM and PSCM were collected and centrifuged at 400g for 5 minutes. Supernatant was  
749 aspirated and 5µl mouse serum was added to 'dry' pellets for 5 minutes on ice. Cells were  
750 resuspended in FACS Buffer (Hanks Balanced Salt Solution, 0.5% Human Serum Albumin) and  
751 stained with CD14 or matched isotype control antibodies on ice for 20 minutes then washed twice  
752 (3ml FACS Buffer, spun at 400g, 5 minutes). Resuspended cells were fixed with 4%  
753 paraformaldehyde (PFA) for 15 minutes at room temperature. PFA was washed out and cells  
754 rinsed twice in FACS buffer before resuspending in PBS and stored overnight at 4°C. Fixed cells  
755 were permeabilized with 0.1% Triton X-100 (in 1XPBS) for 10 minutes at room temperature and  
756 washed twice. Blocking buffer (0.3M glycine buffer, 10% Goat Serum, 1XPBS) was added to 'dry'  
757 pellets on ice for 1 hour. Cells were stained with antibodies to Type I Collagen or matched isotype  
758 control on ice for 20 minutes. Cells were washed twice then incubated with secondary antibody  
759 for 20 minutes on ice in the dark. Cells were then washed twice and resuspended for analysis on  
760 a CytoFLEX S flow cytometer (Beckman Coulter, Brea, CA) using CytExpert acquisition software.  
761 Post-acquisition analysis was performed with FCS Express 7 flow cytometry software.  
762

| Flow Cytometry antibodies        |                                                                                        |
|----------------------------------|----------------------------------------------------------------------------------------|
| CD14                             | Brilliant Violet 421™ anti-Human CD14 (BioLegend: Cat. No. 325628; RRID:AB_2563296 )   |
| CD14 Isotype                     | Brilliant Violet 421™ Mouse IgG1 (BioLegend: Cat. No. 400157; RRID:AB_10897939)        |
| Type I Collagen Primary antibody | Rabbit Anti-Collagen I antibody (Abcam: Cat. No. ab264074)                             |
| Secondary Antibody               | Goat Anti-Rabbit IgG H&L (Alexa Fluor®488) (Abcam: Cat. No. ab150077; RRID:AB_2630356) |
| Type I Collagen Isotype          | Rabbit IgG monoclonal Isotype Control (Abcam: Cat. No. Ab172730; RRID:AB_2687931)      |

763

764 Stimulation Assay

765 On day 5 of differentiation, one well containing peripheral blood monocyte- or human pluripotent  
766 stem cell-derived macrophages were stimulated with 10ng/ml Lipopolysaccharide (LPS) (Sigma-  
767 Aldrich; *Salmonella enterica* serotype minnesota) for 2 hours. After stimulation period, media was  
768 aspirated, and the wells were washed twice with PBS (Ca<sup>2+</sup>+Mg<sup>2+</sup> free). before cell lysis using 2-  
769 mercaptoethanol (Sigma-Aldrich) and RNeasy Plus Lysis Buffer (Qiagen). Samples were placed  
770 into Eppendorf's and stored at -80°C before RNA extraction.

771

772 RNA extraction

773 Total RNA was isolated using the RNeasy® Plus Mini Kit (Qiagen) according to manufacturer's  
774 instructions. In summary: for the removal of genomic DNA, samples were placed into gDNA  
775 columns and centrifuged for 30 seconds at 8000g. Ethanol (70%) was mixed with the flow through  
776 and samples were transferred to RNeasy spin columns. The columns were centrifuged for 15



*Rajab et al.*

777 seconds at 8000g. Buffer RW1 was then added to the columns and columns were centrifuged for  
778 15 seconds at 8000g. Buffer RPE was added to the columns and columns were centrifuged for  
779 15 seconds. Buffer RPE was again added to the columns with centrifugation at 8000g for 2  
780 minutes. Columns were then placed into new collection tubes and centrifuged at full speed for 1  
781 minute to dry the membrane. RNase-free water was then added directly onto the column  
782 membrane and columns placed into Eppendorf's and centrifuged at 8000g for 1 minute to collect  
783 RNA. RNA quality and quantity were determined using a Tapestation (Agilent Technologies  
784 2200). Samples were stored at -80°C. Zymo Research RNA Clean & Concentrator-25 Kit was  
785 used to pool replicates (from the same donor) together and elute in elute into smaller volume with  
786 maximum concentration.

787  
788 RNA sequencing

789 RNA samples were processed by the Ramaciotti Centre for Genomics (University of New South  
790 Wales; Sydney). Illumina Novaseq\_6000 was used for mRNA-sequencing.

791

792 Data and Code Availability

793 mRNA-sequencing data is available through accession GSE150893. All public accessions are  
794 listed in Supplementary Table 6. Stemformatics code is publicly available  
795 at [bitbucket.org/stemformatics](http://bitbucket.org/stemformatics). Atlas code is available  
796 at [bitbucket.org/stemformatics/s4m\\_pyramid/src/master/scripts/atlas.py](http://bitbucket.org/stemformatics/s4m_pyramid/src/master/scripts/atlas.py).

797

798 Graphing software and Illustration

799 Graphs for mRNA-seq gene expression were generated using Graphpad Prism. Violin plots  
800 were generated through the [www.stemformatics.org](http://www.stemformatics.org) platform. Schematic Figure illustrations  
801 created with BioRender.com

**(A) Coloured by cell type**

bioRxiv preprint doi: <https://doi.org/10.1101/719237>; this version posted July 8, 2020. The copyright holder for this preprint (which was not certified by peer review) is the author/funder, who has granted bioRxiv a license to display the preprint in perpetuity. It is made available under aCC-BY-NC 4.0 International license.

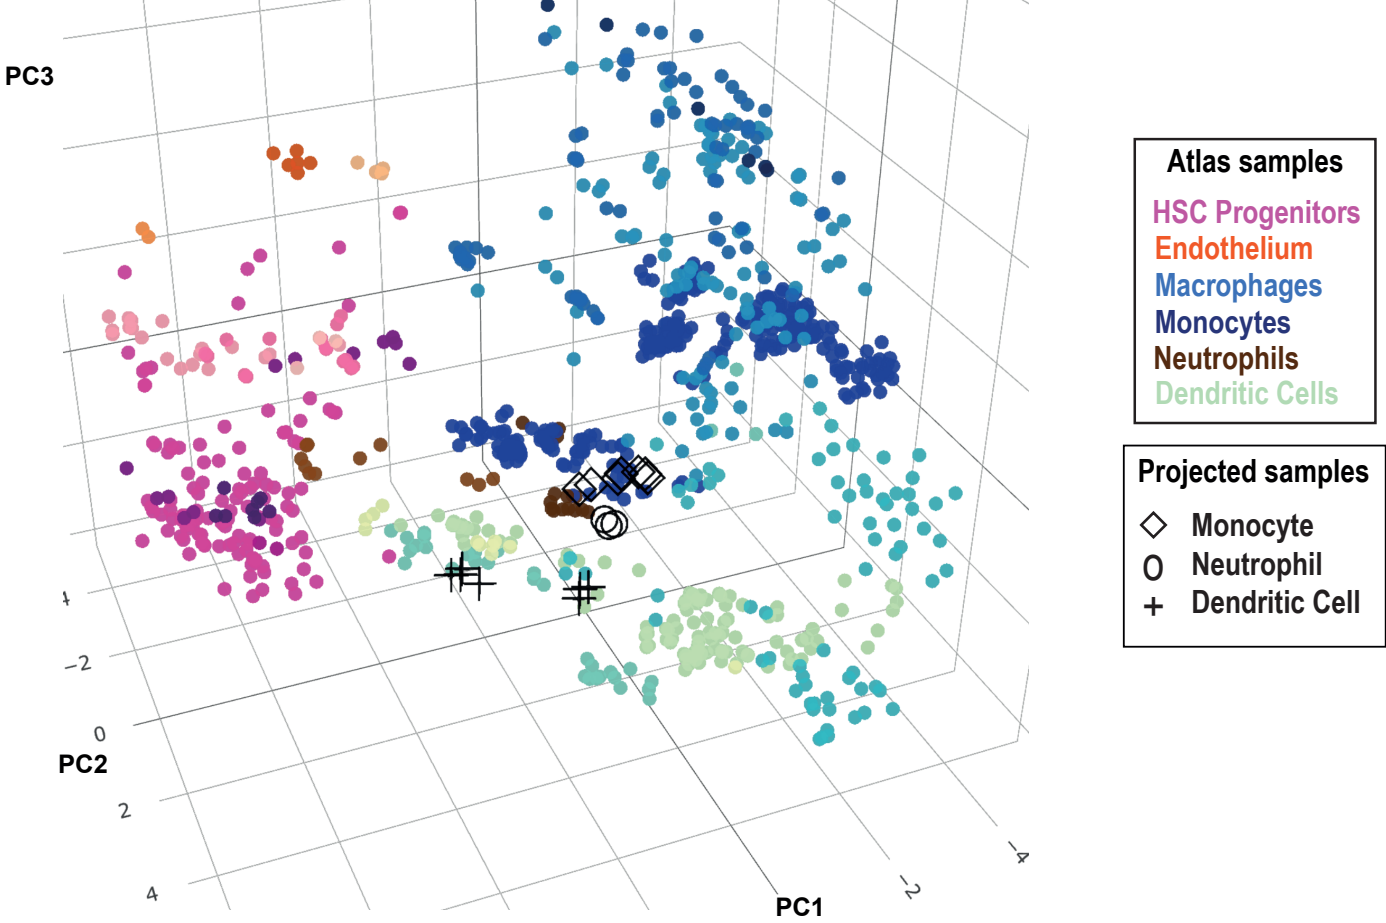

**(B) Coloured by gene expression**

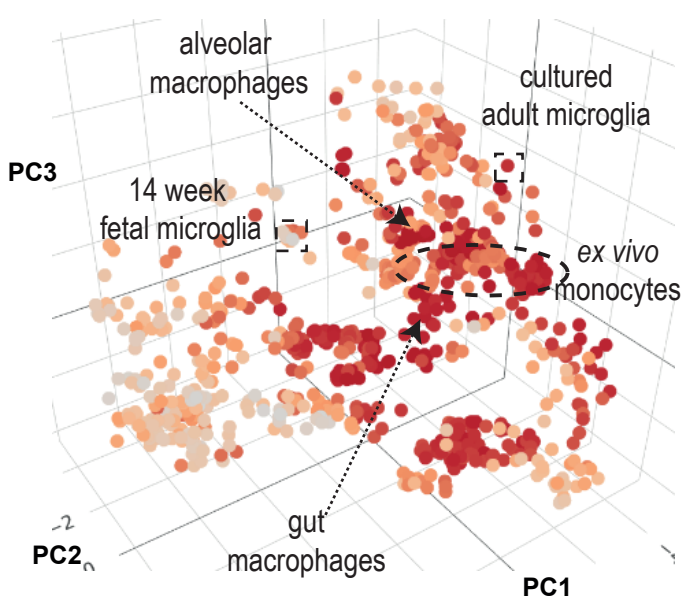

**(C) Coloured by culture status**

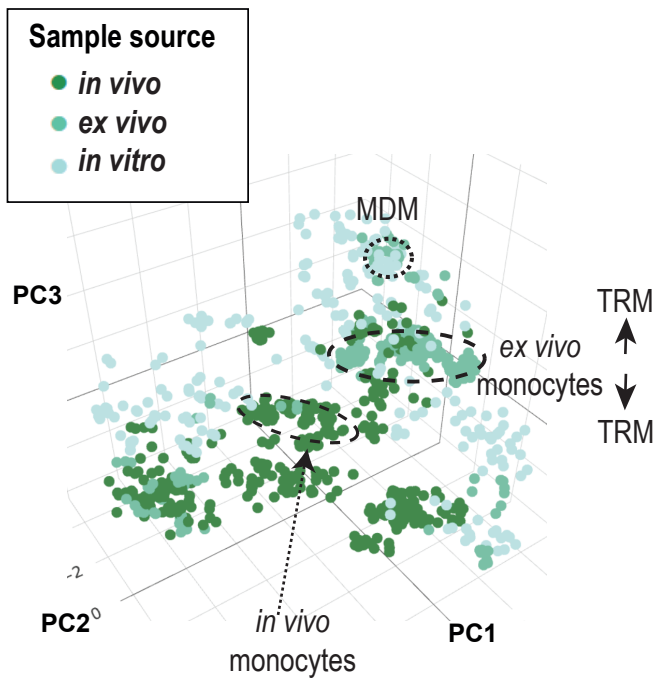

**Figure 1: A reference atlas for human myeloid biology**

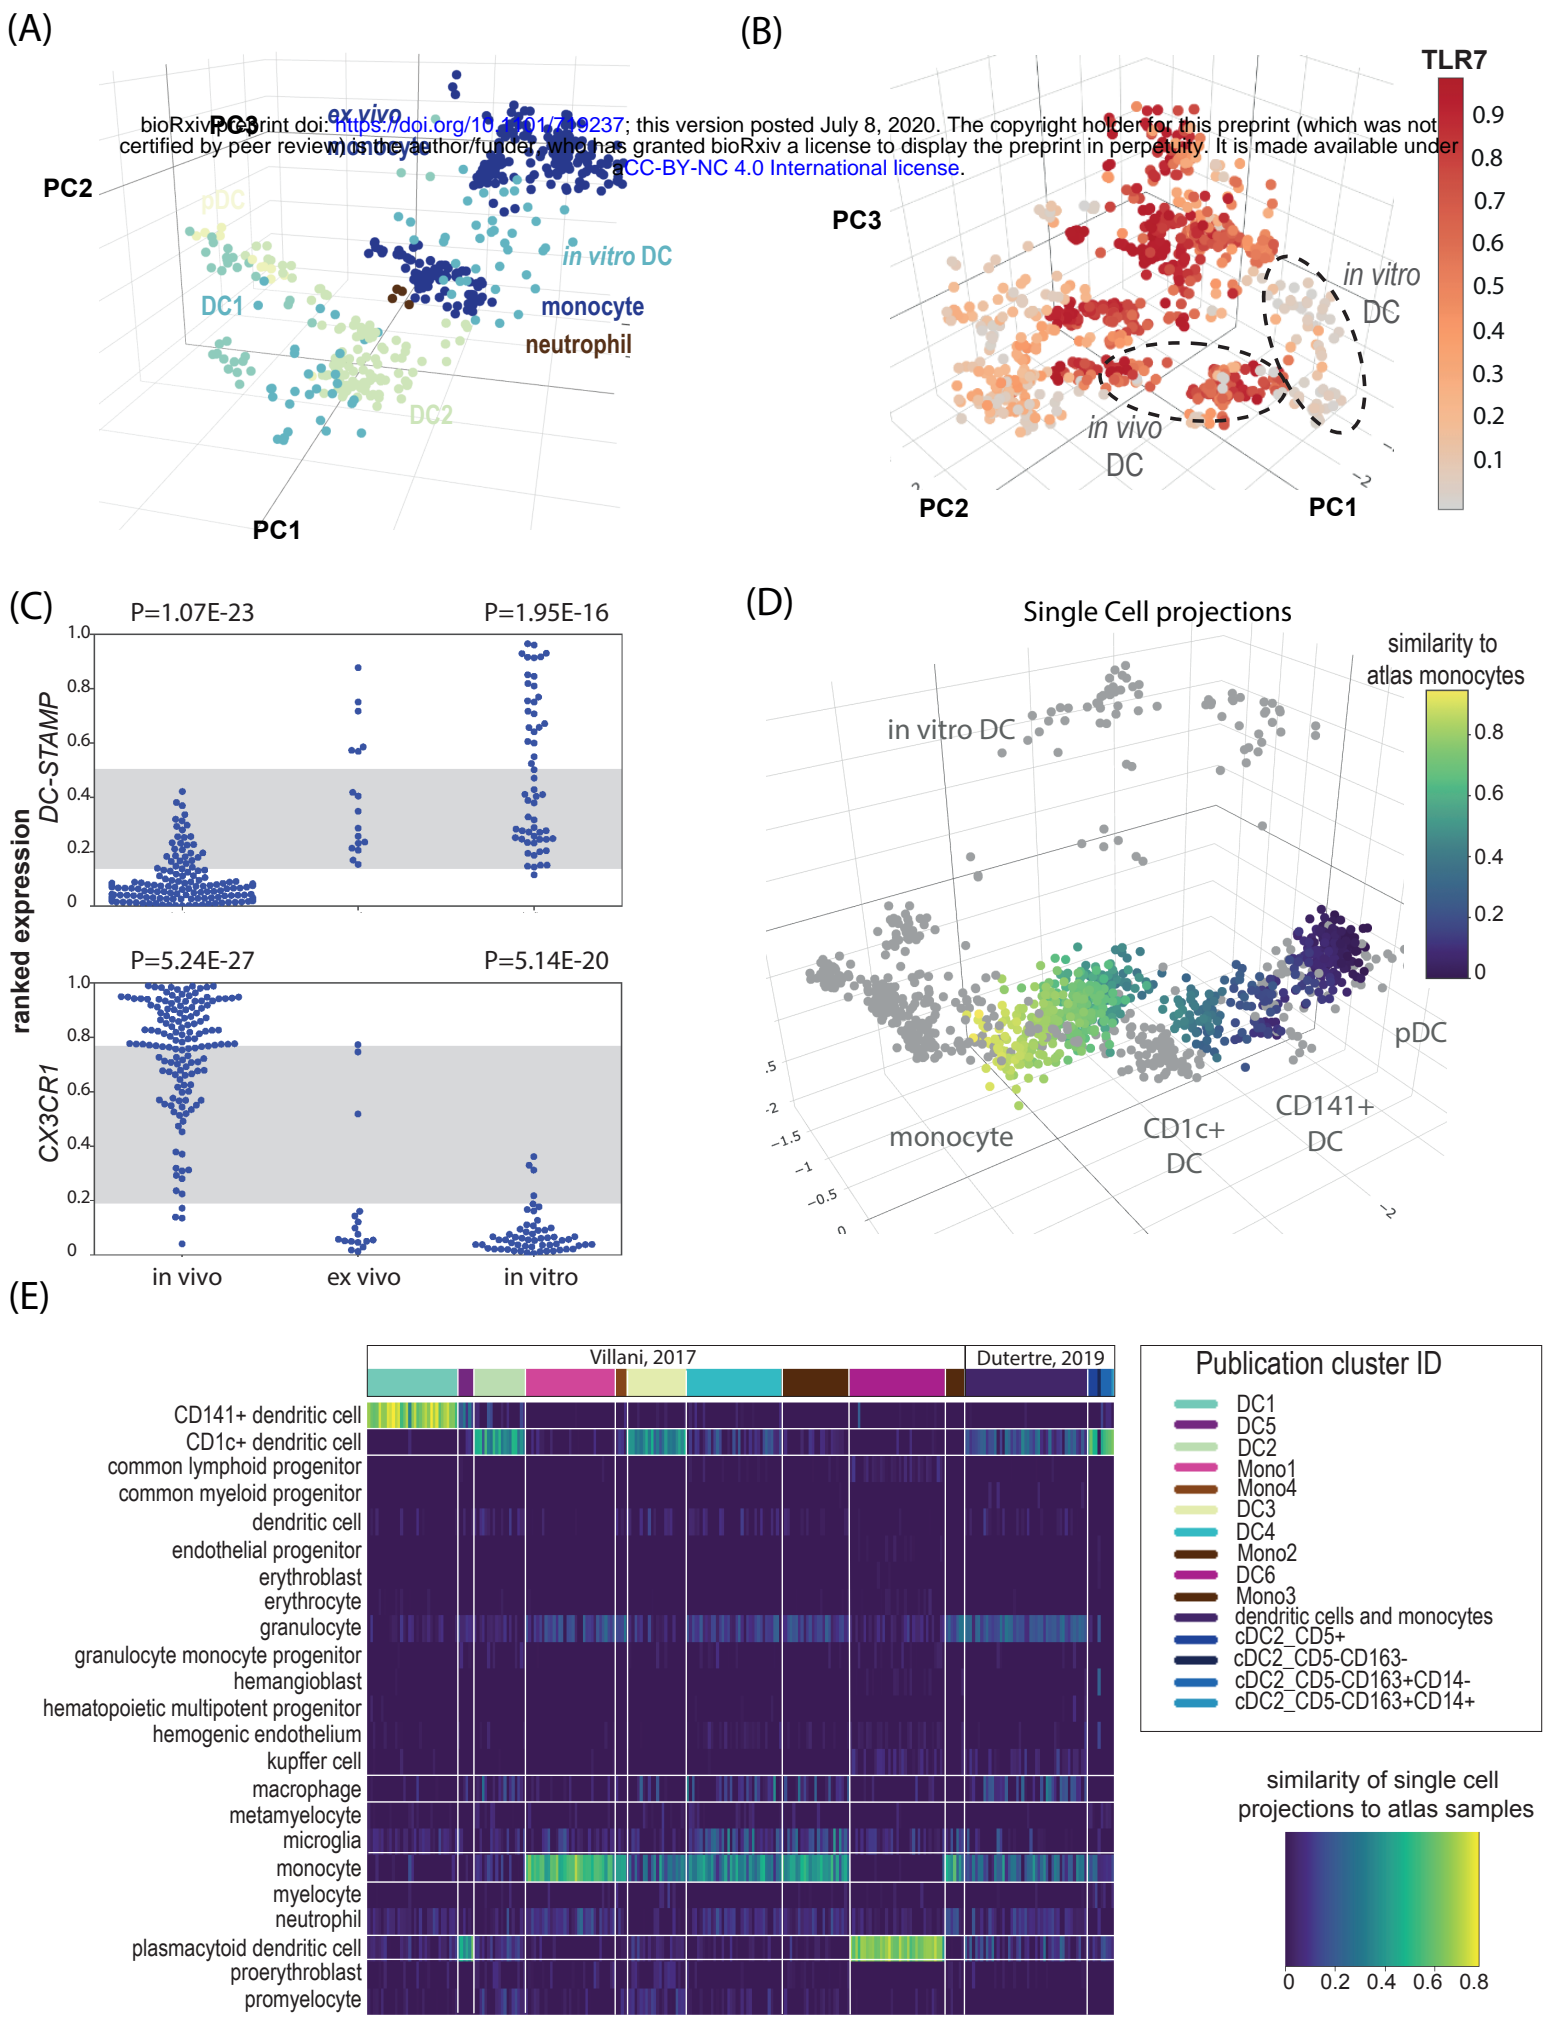

**Figure 2: Cultured and *in vitro*-derived dendritic cells do not capture aspects of *in vivo* myeloid biology**

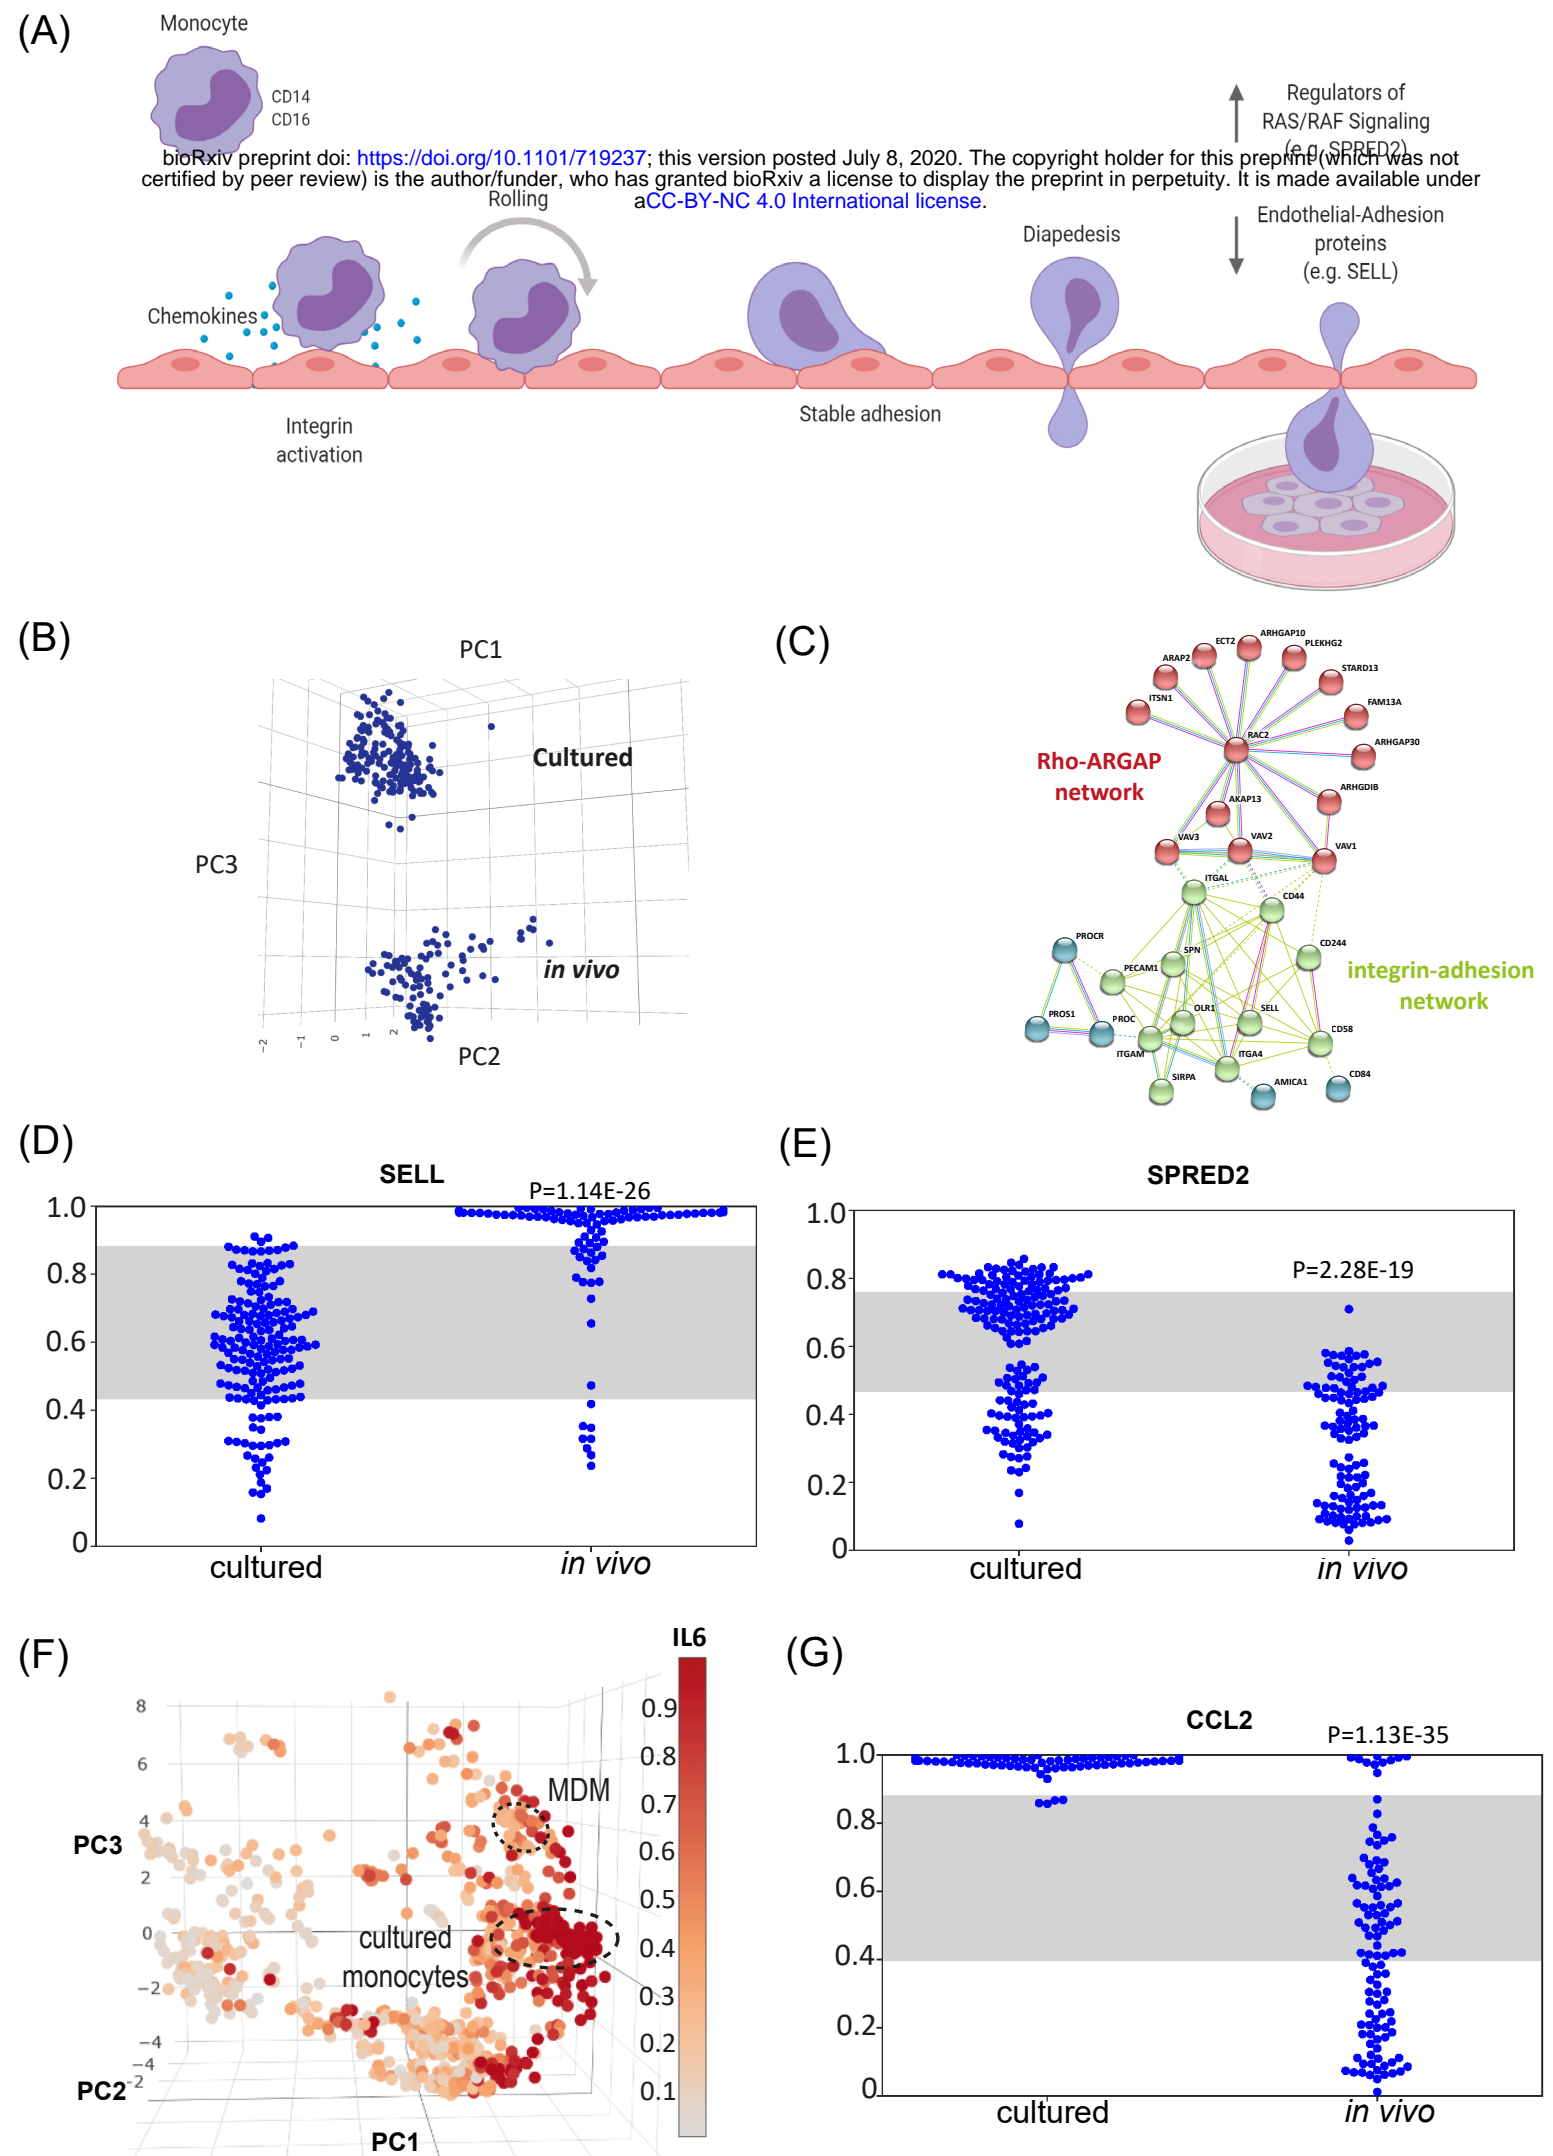

**Figure 3: Monocytes rapidly adapt to culture**

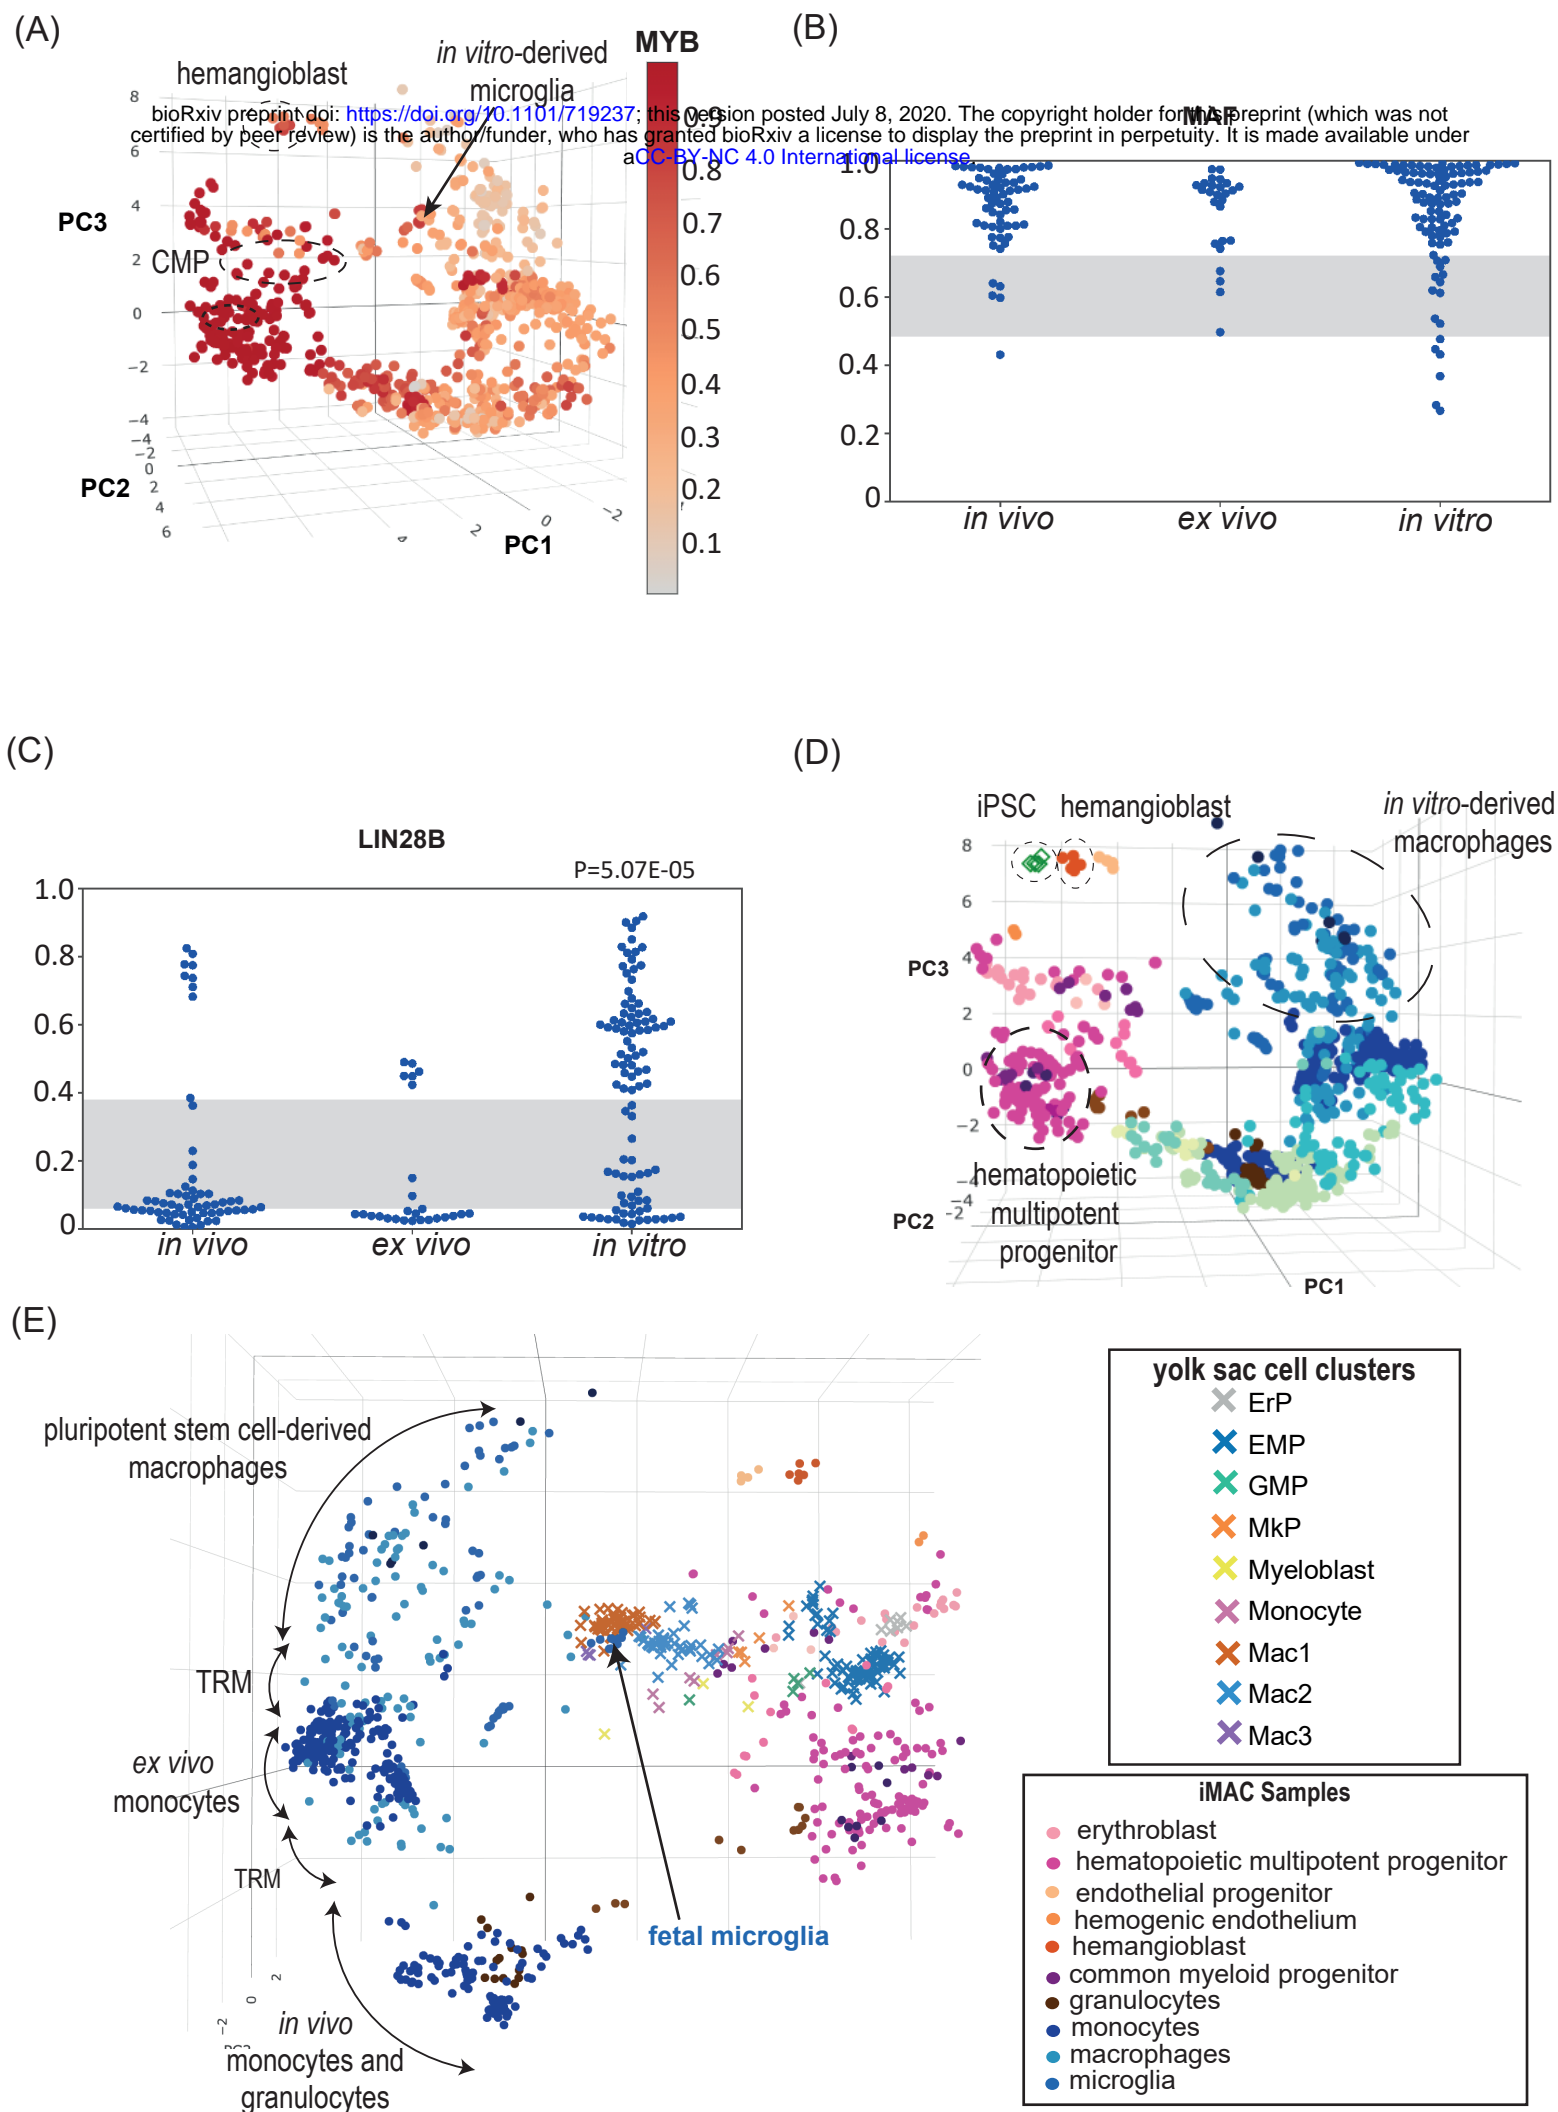

**Figure 4: Pluripotent stem cell-derived macrophages do not recapitulate hematopoietic ontogenies**



(A)

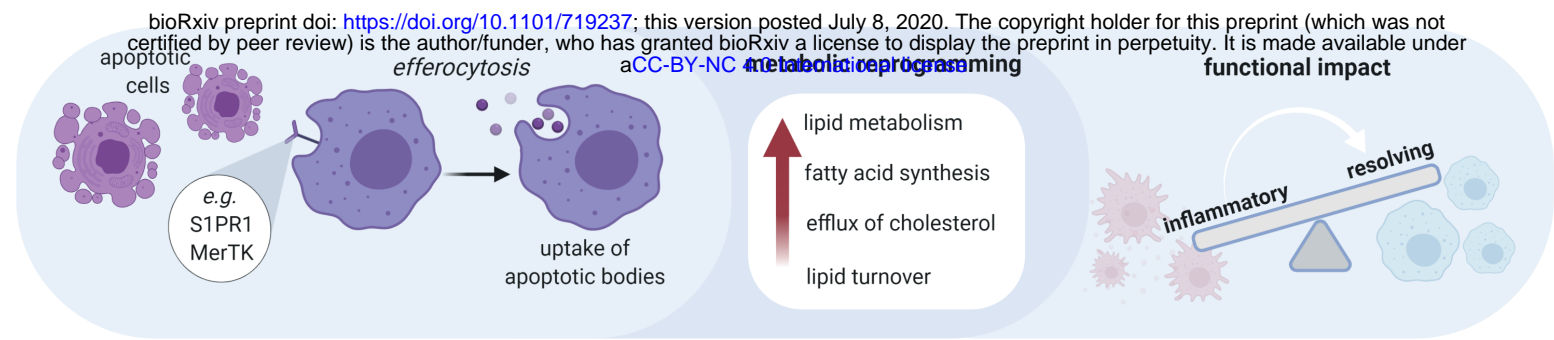

(B)

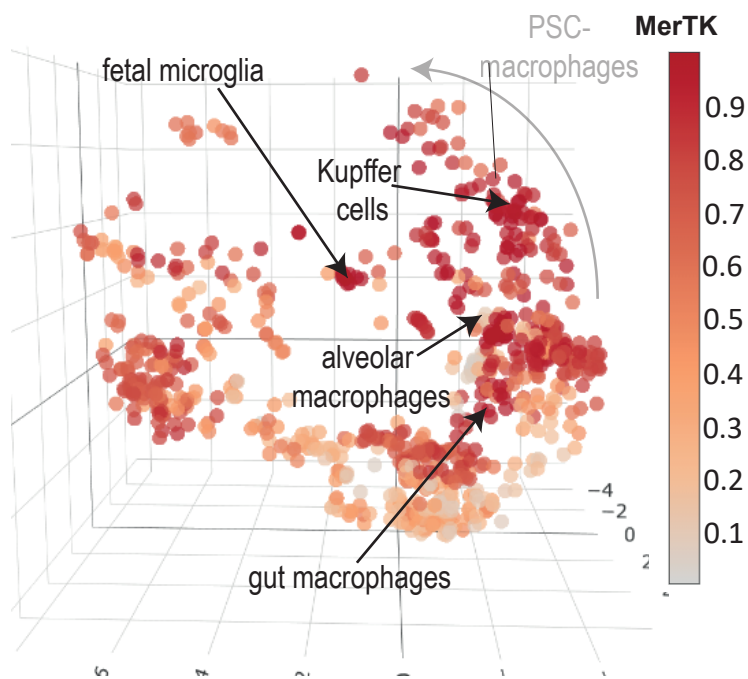

(C)

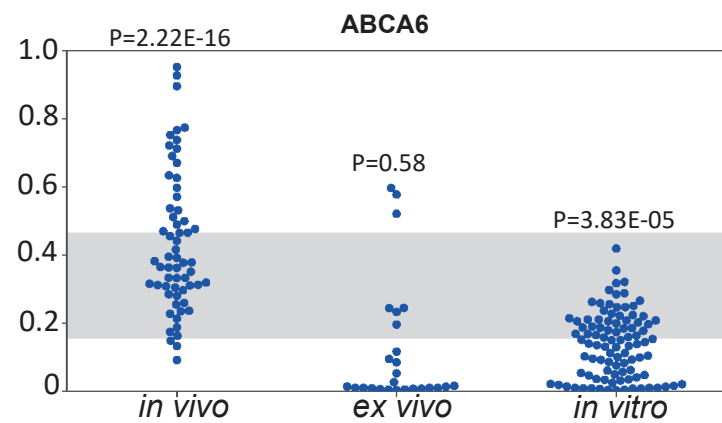

(D)

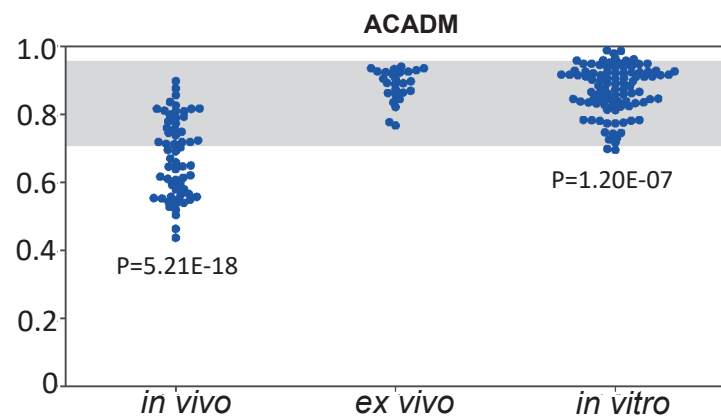

(E)

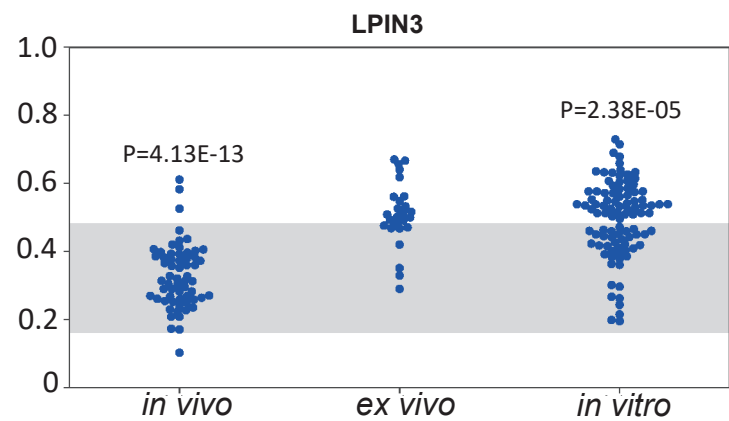

Figure 5: Pluripotent stem cell-derived macrophages display transcriptional hallmarks of efferocytosis

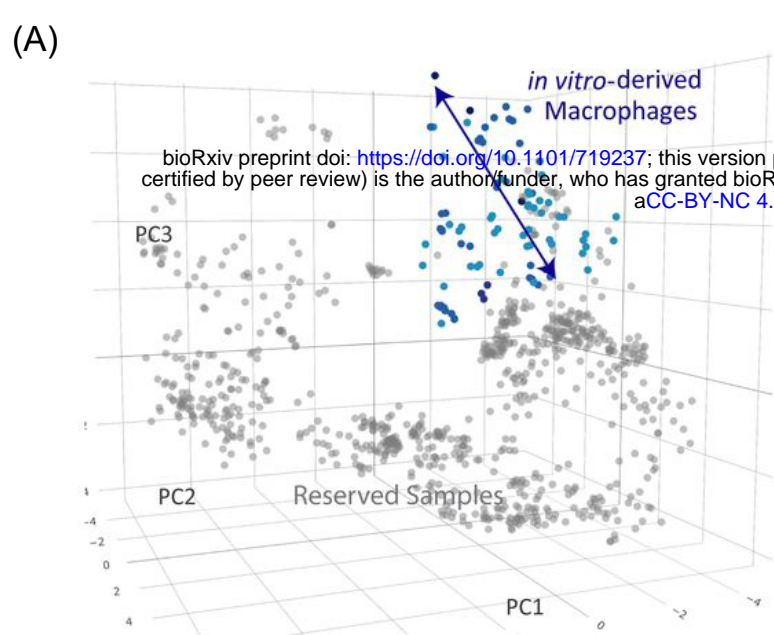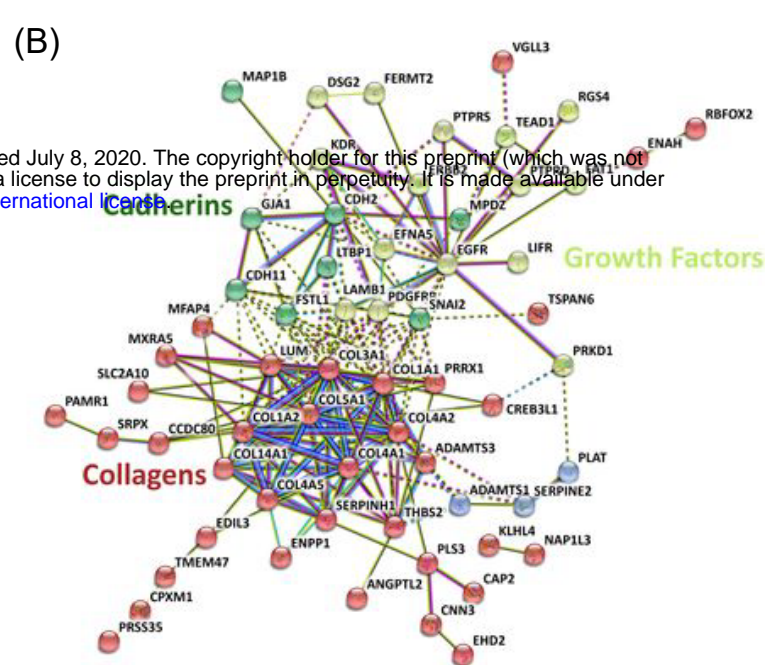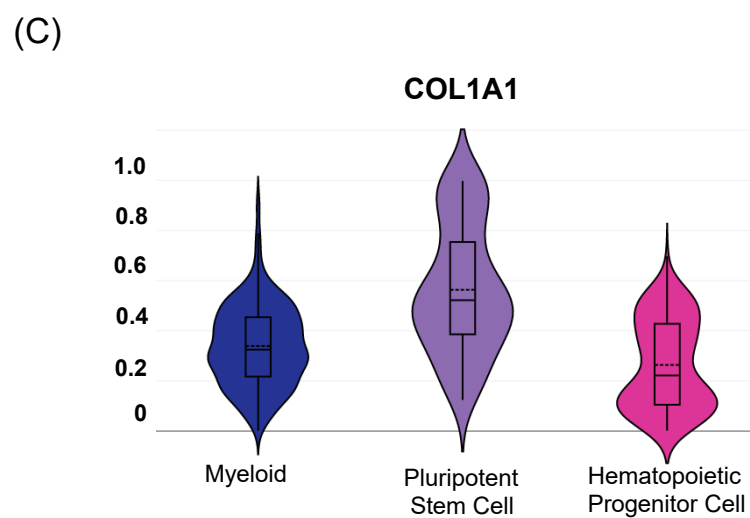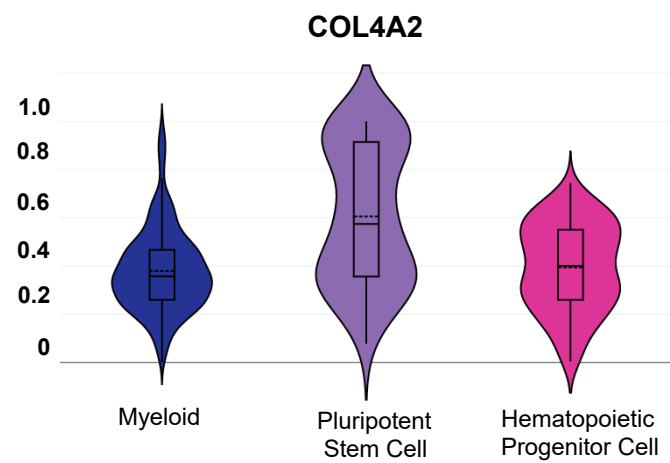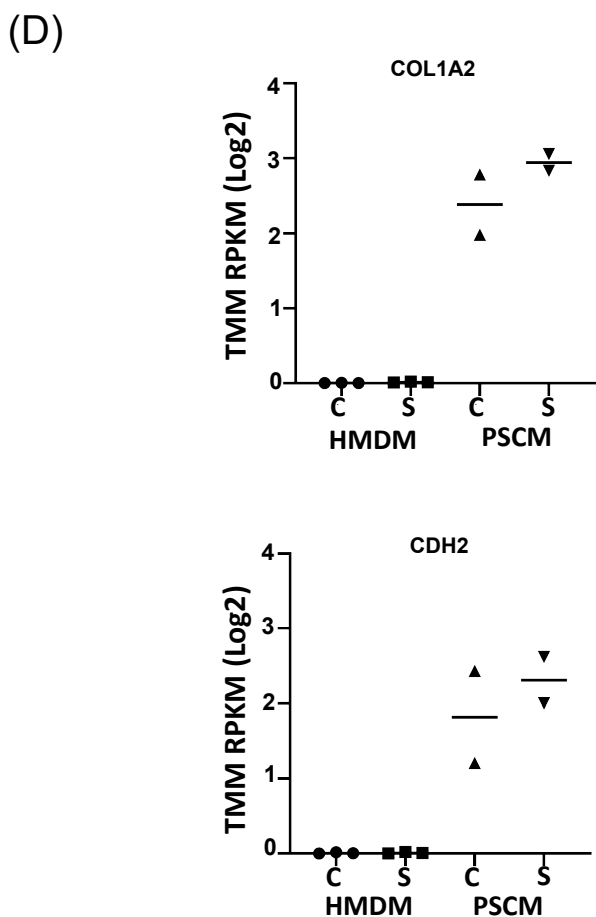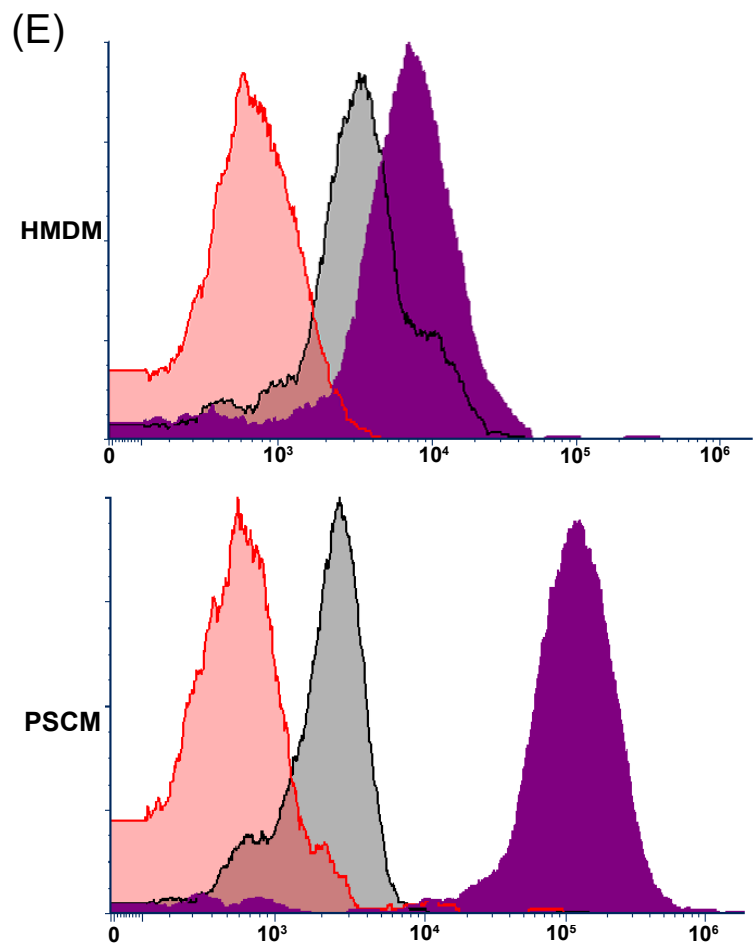

Figure 6: Pluripotent stem cell-derived macrophages express high levels of collagen

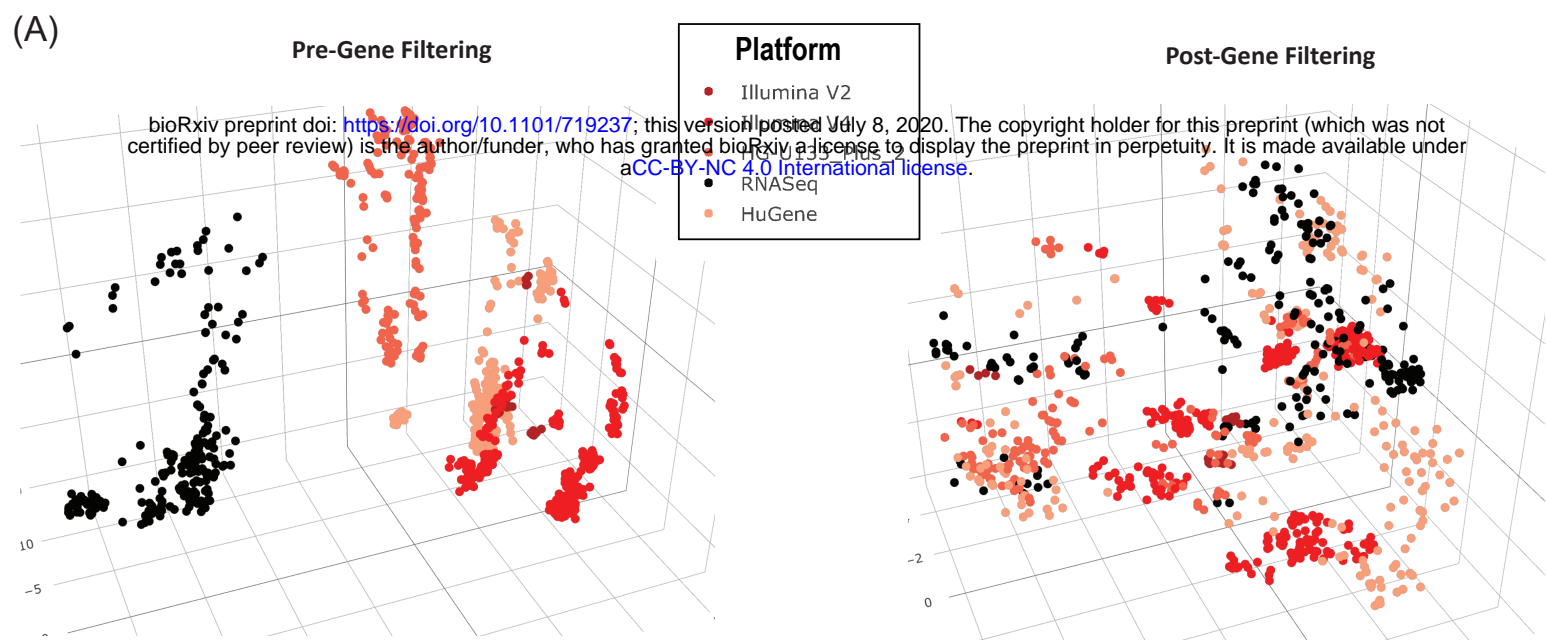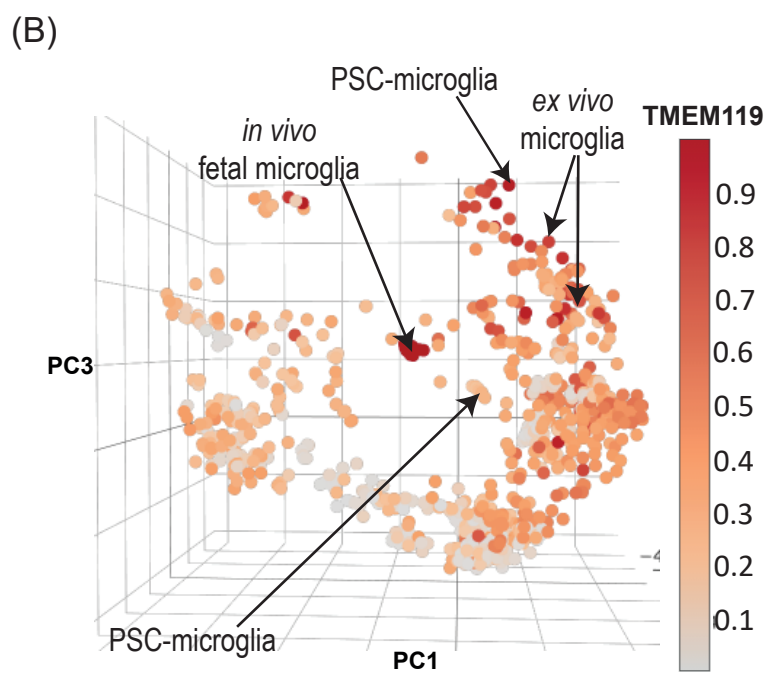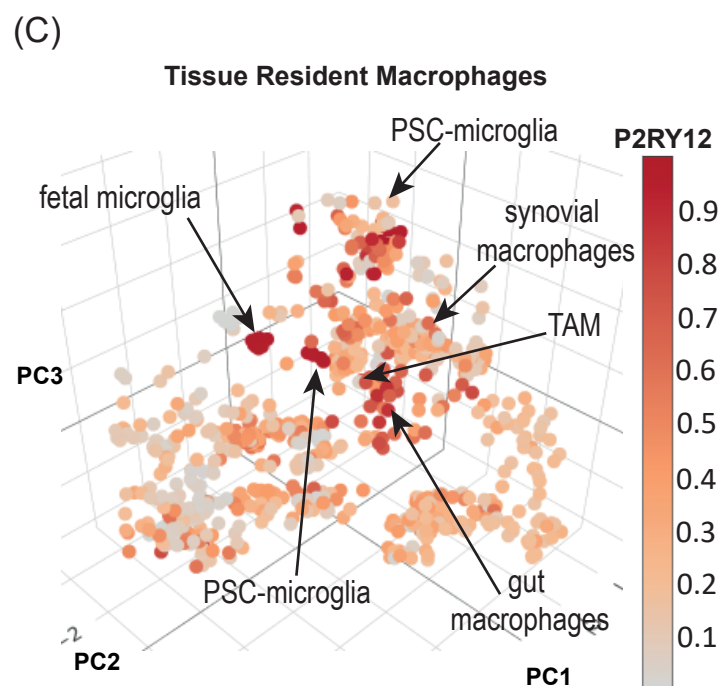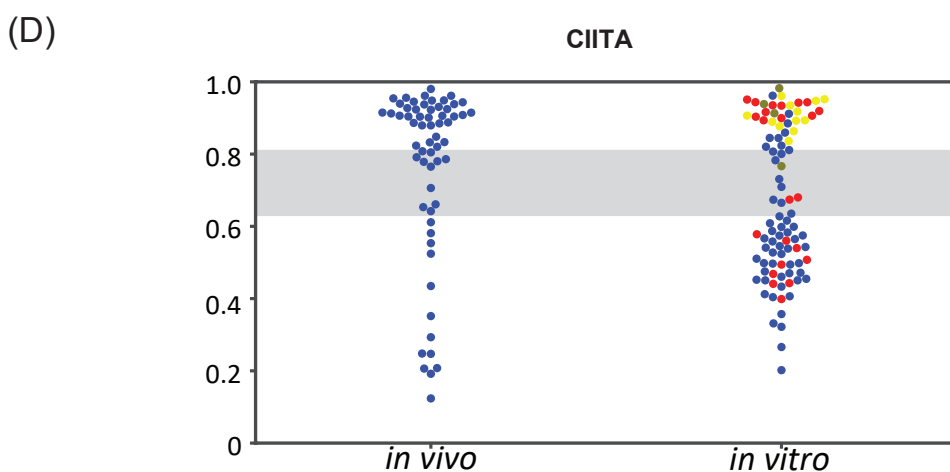

**Figure S1: A reference atlas and resource for human myeloid biology. Related to Figure 1.**

(A) Pre-gene filtering (left) and Post-gene filtering (right) iMAC atlas coloured by platform: red various microarray platforms, black RNAseq platforms. (B) iMAC atlas coloured by ranked expression of TMEM119 (Scale bar: high ranked expression (dark red) to low ranked expression (grey)) (C) iMAC atlas coloured by ranked expression of P2RY12 (Scale bar: high ranked expression (dark red) to low ranked expression (grey)) (D) Ranked expression (Y-axis) of Class II transactivator (CIITA) *in vivo* versus *in vitro*-derived macrophages (gut, synovial, kupffer, microglia, macrophage). Red – activated, yellow – (Abud et al., 2017) microglia samples, khaki- Honda-Ozaki et al. (2018) macrophage samples.

(A)

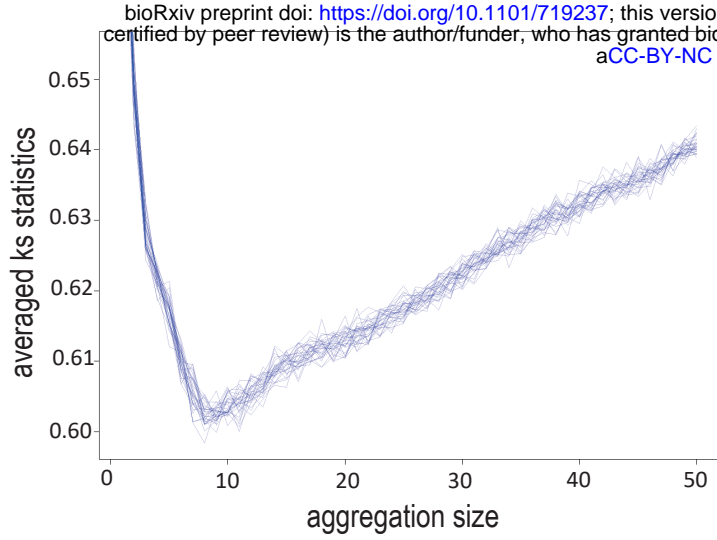

(B)

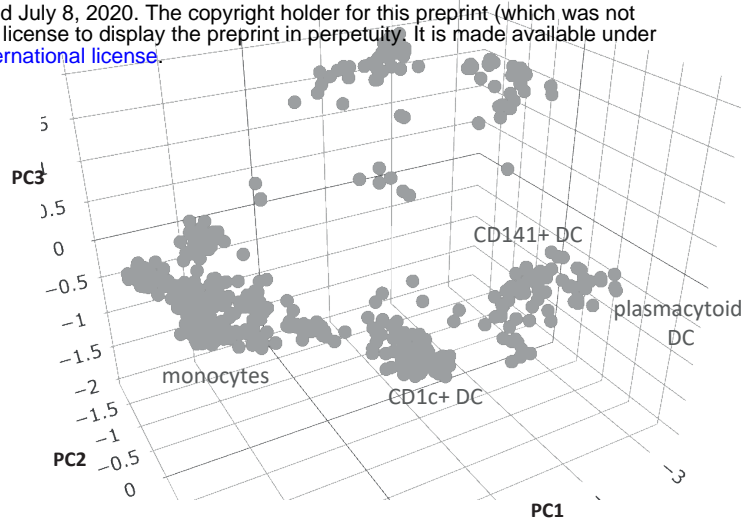

(C)

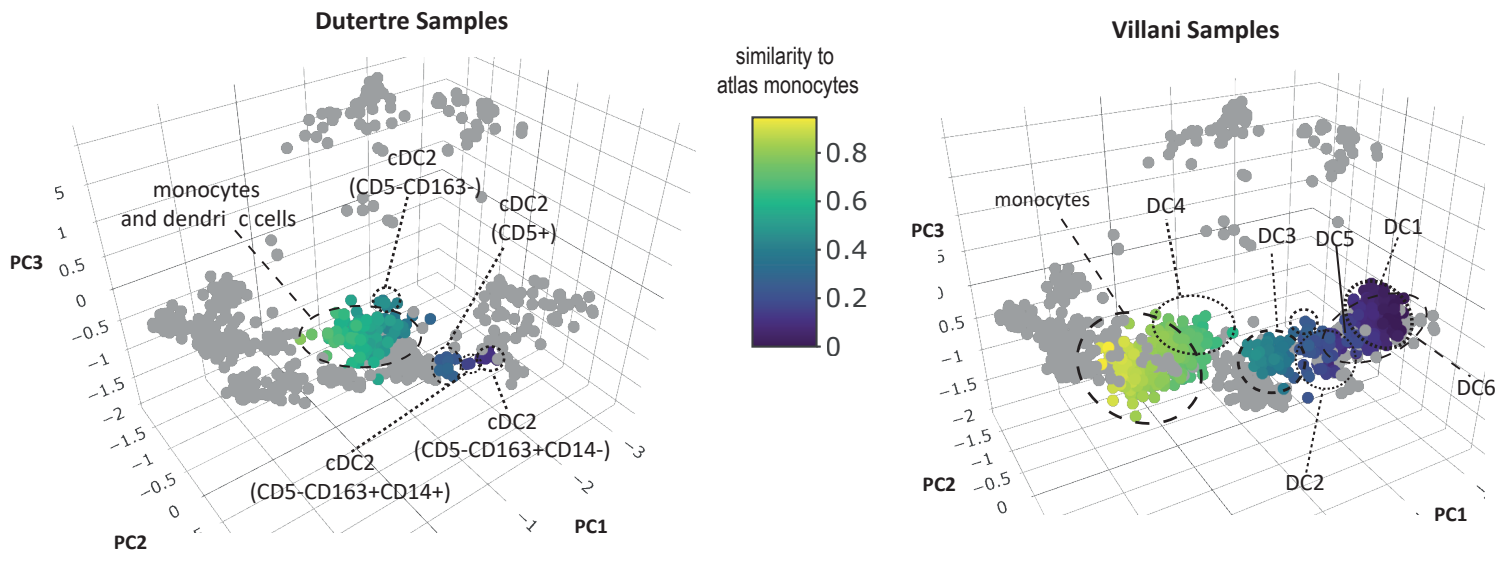

**Figure S2: Single cell aggregation and projection. Related to Figure 2.**

(A) Kolmogorov–Smirnov (KS) statistics (y-axis) to assess the difference in gene expression distribution between pseudo-bulk single cells DC6 and bulk sample plasmacytoid dendritic cells from the atlas, with respect to the number of single cells that are aggregated (x-axis). Each line indicates one of thirty random sub-samplings with replacement trial. KS statistics are calculated on each gene and averaged across all genes. A minimum KS statistic is obtained when aggregating 8 cells. (B) iMAC atlas cell types before single cell projection (C) Single cell projection of (Dutertre et al., 2019) and (Villani et al., 2017) samples onto the iMAC atlas where a 8 cells are aggregated based on (A).

(A)

bioRxiv preprint doi: <https://doi.org/10.1101/719237>; this version posted July 8, 2020. The copyright holder for this preprint (which was not certified by peer review) is the author/funder, who has granted bioRxiv a license to display the preprint in perpetuity. It is made available under aCC-BY-NC 4.0 International license.

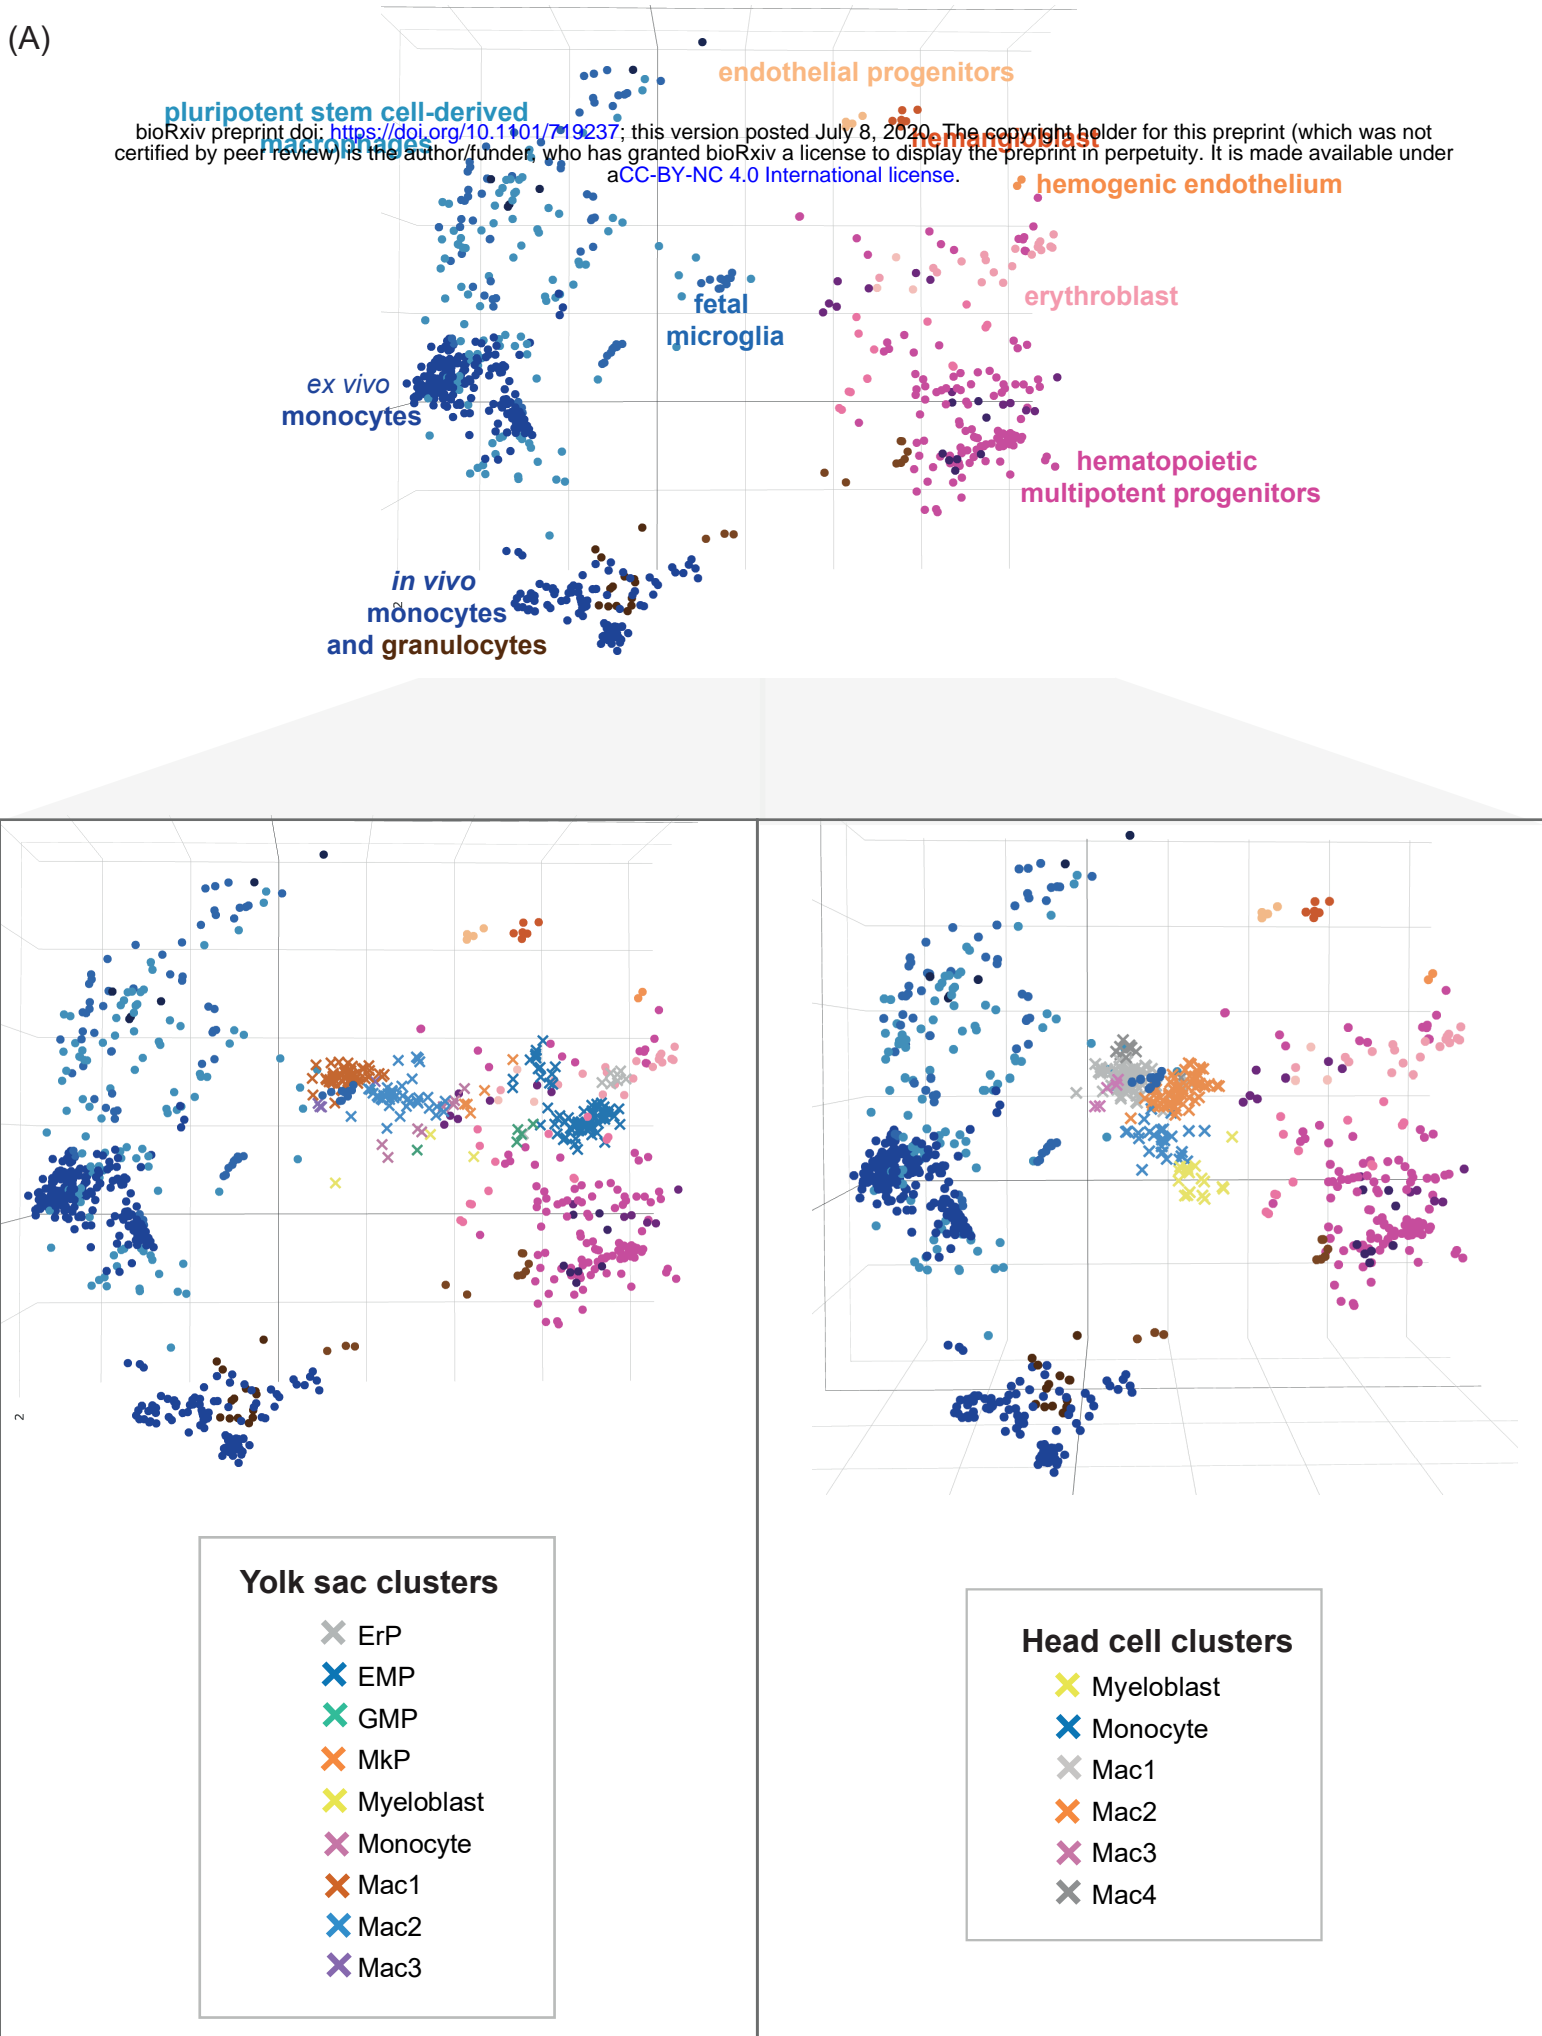

**Figure S3: Fetal Ontogeny. Related to Figure 4.**

iMAC atlas coloured by cell type with (Bian et al., 2020) projection of single cell data from human fetal yolk sac and head.



## **Supplemental Tables**

### **Table S1: Datasets and samples to compile iMAC atlas and single cell projection. Related to Figure 1.**

Tissue resident macrophages and dendritic cells from peripheral blood, spleen, thymus, joint, lung, gut, brain and liver. Samples also included monocytes from peripheral and cord blood, as well as *in vitro* differentiated DCs from cord blood progenitors or monocyte-derived macrophages. Columns include dataset accession ID, platform, Stemformatics Dataset ID, number of samples, tier categorization, cell type and relevant tissue/organism part.

### **Table S2: dendritic cells. Related to Figure 2.**

Comparison of gene expression of *in vivo* (n=145), *ex vivo* (n=17) and *in vitro*- (n=57) derived dendritic cells. Columns refer to gene symbols, P-values re-calculated by Mann-WhitneyWilcoxon rank-sum test, mean and standard deviation.

### **Table S3: *in vivo* vs. *ex vivo* monocytes. Related to Figure 3.**

Comparison of gene expression of *ex vivo* (n=171) and *in vivo* (n=107) monocytes. Columns refer to gene symbols, P-values re-calculated by Mann-Whitney-Wilcoxon rank-sum test, mean and standard deviation.

### **Table S4: *in vivo* vs. *ex vivo* vs. *in vitro* macrophages. Related to Figure 4 and Figure 5.**

Comparison of gene expression of *in vivo* (n=61), *ex vivo* (n=26), *in vitro*- (n=96) derived macrophages (gut, synovial, kupffer, microglia, macrophage). Columns refer to gene symbols, P-values recalculated by Mann-Whitney-Wilcoxon rank-sum test, mean and standard deviation.

### **Table S5: *in vivo* vs. *ex vivo* vs. *in vitro* microglia. Related to Figure 4 and Figure 5.**

Comparison of gene expression of *in vivo* (n=10), *ex vivo* (n=21) and *in vitro*- (n=43) derived microglia. Columns refer to gene symbols, P-values re-calculated by Mann-Whitney-Wilcoxon rank-sum test, mean and standard deviation.

### **Table S6: Gene-Set Enrichment Analysis. Related to Figure 6.**

Table of the top 10 Reactome pathways enriched in genes highly correlated with *in vitro*-derived macrophage spread. Enrichment: number of genes in the list/number of genes in that pathway (False Discovery Rate-value). Genes: multiple entries assigned to the same gene indicated by underlining of gene symbol with UniProt accessions in brackets.

## **Supplemental Video**

Active engulfment and clearance of cells by pluripotent stem cell-derived macrophages.

**Table S6: Gene-Set Enrichment Analysis**

| Table 1                                                      |                   |                                                                                                                                                           |
|--------------------------------------------------------------|-------------------|-----------------------------------------------------------------------------------------------------------------------------------------------------------|
| Pathway                                                      | Enrichment        | Genes                                                                                                                                                     |
| Collagen biosynthesis and modifying enzymes                  | 11/76 (3.76e-09)  | ADAMTS3, COL1A2, COL4A2, SERPINH1, COL14A1, COL3A1, COL4A5, COL1A1, <u>COL4A1</u> (P02462, Q03692), COL5A1                                                |
| Extracellular matrix organization                            | 18/329 (4.48e-09) | ADAMTS1, COL1A1, <u>COL4A1</u> (P02462, Q03692), COL5A1, LTBP1, PTPRS, ADAMTS3, COL1A2, COL4A2, KDR, LUM, SERPINH1, COL14A1, COL3A1, COL4A5, LAMB1, MFAP4 |
| Collagen chain trimerization                                 | 9/44 (4.81e09)    | COL14A1, COL3A1, COL4A5, COL1A1, <u>COL4A1</u> (P02462, Q03692), COL5A1, COL1A2, COL4A2                                                                   |
| Collagen formation                                           | 11/104 (2.39e-08) | ADAMTS3, COL1A2, COL4A2, SERPINH1, COL14A1, COL3A1, COL4A5, COL1A1, <u>COL4A1</u> (P02462, Q03692), COL5A1                                                |
| ECM proteoglycans                                            | 10/79 (2.39e-08)  | COL1A1, COL4A1, COL5A1, PTPRS, COL1A2, COL4A2, LAMB1, COL3A1, COL4A5, LUM                                                                                 |
| Non-integrin membrane-ECM interactions                       | 9/61 (3.83e-08)   | COL1A1, <u>COL4A1</u> (P02462, Q03692), COL5A1, COL1A2, COL4A2, LAMB1, COL3A1, COL4A5                                                                     |
| Integrin cell surface interactions                           | 10/86 (3.83e-08)  | COL1A1, <u>COL4A1</u> (P02462, Q03692), COL5A1, COL1A2, COL4A2, KDR, COL3A1, COL4A5, LUM                                                                  |
| Assembly of collagen fibrils and other multimeric structures | 9/67 (6.95e-08)   | COL14A1, COL3A1, COL4A5, COL1A1, <u>COL4A1</u> (P02462, Q03692), COL5A1, COL1A2, COL4A2                                                                   |
| Collagen degradation                                         | 9/69 (7.93e-08)   | COL14A1, COL3A1, COL4A5, COL1A1, <u>COL4A1</u> (P02462, Q03692), COL5A1, COL1A2, COL4A2                                                                   |
| Degradation of the extracellular matrix                      | 11/148 (3.73e-07) | ADAMTS1, COL1A2, COL4A2, LAMB1, COL14A1, COL3A1, COL4A5, COL1A1, <u>COL4A1</u> (P02462, Q03692), COL5A1                                                   |

Table of the top 10 Reactome pathways enriched in genes highly correlated with *in vitro*-derived macrophage spread. Enrichment: number of genes in the list/number of genes in that pathway (False Discovery Rate-value). Genes: multiple entries assigned to the same gene indicated by underlining of gene symbol with UniProt accessions in brackets.
